# Supplementary material
Source: PubMed Central journal article supplement (PMC9235293)
Supplement: mmc1.pdf [file mmc1.pdf]

## Supporting Information

for

### **A Multi-Pronged Evaluation of Aldehyde-Based Tripeptidyl Main Protease Inhibitors as SARS-CoV-2 Antivirals**

Yuying Ma<sup>a,†</sup>, Kai S. Yang<sup>a,†</sup>, Zhi Zachary Geng<sup>a,†</sup>, Yugendar R. Alugubelli<sup>a,†</sup>, Namir Shaabani,<sup>b,†</sup> Erol C. Vatansever<sup>a,†</sup>, Xinyu R. Ma<sup>a,†</sup>, Chia-Chuan Cho<sup>a,†</sup>, Kaustav Khatua<sup>a,†</sup>, Jing Xiao<sup>a</sup>, Lauren R. Blankenship<sup>a</sup>, Ge Yu<sup>a</sup>, Banumathi Sankaran<sup>c</sup>, Pingwei Li<sup>d</sup>, Robert Allen<sup>b</sup>, Henry Ji<sup>b,\*</sup>, Shiqing Xu<sup>a,\*</sup>, and Wenshe Ray Liu<sup>a,d,e,f,\*</sup>

<sup>a</sup>Texas A&M Drug Discovery Laboratory, Department of Chemistry, Texas A&M University, College Station, TX 77843, USA

<sup>b</sup>Sorrento Therapeutics, Inc. San Diego, CA 92121, USA

<sup>c</sup>Molecular Biophysics and Integrated Bioimaging, Berkeley Center for Structural Biology, Lawrence Berkeley National Laboratory, Berkeley, CA 94720, USA

<sup>d</sup>Department of Biochemistry and Biophysics, Texas A&M University, College Station, TX 77843, USA

<sup>e</sup>Institute of Biosciences and Technology and Department of Translational Medical Sciences, College of Medicine, Texas A&M University, Houston, TX 77030, USA

<sup>f</sup>Department of Molecular and Cellular Medicine, College of Medicine, Texas A&M University, College Station, TX 77843, USA

<sup>†</sup>Contributed equally to the paper.

\*Correspondence should be addressed to Henry Ji: [hji@sorrentotherapeutics.com](mailto:hji@sorrentotherapeutics.com), Shiqing Xu: [shiqing.xu@tamu.edu](mailto:shiqing.xu@tamu.edu) and Wenshe Ray Liu: [wslu2007@tamu.edu](mailto:wslu2007@tamu.edu)

**Materials.** We purchased yeast extract from Thermo Fisher Scientific, tryptone from Gibco, Sub3 from Bachem, HEK 293T/17 cells from ATCC, DMEM with GlutaMax from Gibco, FBS from Gibco, polyethyleneimine from Polysciences, the trypsin-EDTA solution from Gibco. Chemicals used in this work were acquired from Sigma Aldrich, Chem Impex, Ambeed, A2B, etc.

**M<sup>Pro</sup> Expression and Purification.** The expression plasmid pET28a-His-SUMO-M<sup>Pro</sup> was constructed in a previous study. We used this construct to transform *E. coli* BL21(DE3) cells. A single colony grown on a LB plate containing 50 µg/mL kanamycin was picked and grown in 5 mL LB media supplemented with 50 µg/mL kanamycin overnight. We inoculated this overnight culture to 6 L 2YT media with 50 µg/mL kanamycin. Cells were grown to OD<sub>600</sub> as 0.8. At this point, we added 1 mM IPTG to induce the expression of His-SUMO-M<sup>Pro</sup>. Induced cells were let grown for 3 h and then harvested by centrifugation at 12,000 rpm, 4 °C for 30 min. We resuspended cell pellets in 150 mL lysis buffer (20 mM Tris-HCl, 100 mM NaCl, 10 mM imidazole, pH 8.0) and lysed the cells by sonication on ice. We clarified the lysate by centrifugation at 16,000 rpm, 4 °C for 30 min. We decanted the supernatant and mixed with Ni-NTA resins (GenScript). We loaded the resins to a column, washed the resins with 10 volumes of lysis buffer, and eluted the bound protein using elution buffer (20 mM Tris-HCl, 100 mM NaCl, 250 mM imidazole, pH 8.0). We exchanged buffer of the elute to another buffer (20 mM Tris-HCl, 100 mM NaCl, 10 mM imidazole, 1 mM DTT, pH 8.0) using a HiPrep 26/10 desalting column (Cytiva) and digested the elute using 10 units SUMO protease overnight at 4 °C. The digested elute was subjected to Ni-NTA resins in a column to remove His-tagged SUMO protease, His-tagged SUMO tag, and undigested His-SUMO-M<sup>Pro</sup>. We loaded the flow-through onto a Q-Sepharose column and purified M<sup>Pro</sup> using FPLC by running a linear gradient from 0 to 500 mM NaCl in a buffer (20 mM Tris-HCl, 1 mM DTT, pH 8.0). Fractions eluted from the Q-Sepharose column was concentrated and loaded onto a HiPrep 16/60 Sephacryl S-100 HR column and purified using a buffer containing 20 mM Tris-HCl, 100 mM NaCl, 1 mM DTT, and 1 mM EDTA at pH 7.8. The final purified was concentrated and stored in a -80 °C freezer.

**In Vitro M<sup>Pro</sup> Inhibition Potency Characterizations of MPIs.** For most MPIs, we conducted the assay using 20 nM M<sup>Pro</sup> and 10 µM Sub3. For MPI13-14, 10 nM M<sup>Pro</sup> was used. We dissolved all inhibitors in DMSO as 10 mM stock solutions. Sub3 was dissolved in DMSO as a 1 mM stock solution and diluted 100 times in the final assay buffer containing 10 mM Na<sub>x</sub>H<sub>y</sub>PO<sub>4</sub>, 10 mM NaCl, 0.5 mM EDTA, and 1.25% DMSO at pH 7.6. We incubated M<sup>Pro</sup> and an inhibitor in the final assay buffer for 30 min before adding the substrate to initiate the reaction catalyzed by M<sup>Pro</sup>. The production format was monitored in a fluorescence plate reader with excitation at 336 nm and emission at 455 nm. More assay details can be found in a previous study.<sup>1</sup>

**X-Ray Crystallography Analysis of M<sup>Pro</sup>-Inhibitor Complexes.** The production of crystals of M<sup>Pro</sup>-inhibitor complexes was following the previous protocols.<sup>1</sup> The data of M<sup>Pro</sup> with MPI11, MPI12 and MPI24 were collected on a Rigaku R-AXIS IV++ image plate detector. The data of M<sup>Pro</sup> with MPI16, MPI18, MPI19, MPI22, MPI23, MPI25 and MPI27 were collected on a Bruker Photon II detector. The data of M<sup>Pro</sup> with MPI14, MPI20, MPI21, MPI26 and MPI28 were collected at the Advanced Light Source (ALS) beamline 5.0.2 using a Pilatus3 6M detector. The diffraction data were indexed, integrated and scaled with iMosflm or PROTEUM3.<sup>2</sup> All the structures were determined by molecular replacement using the structure model of the free enzyme of the SARS-CoV-2 M<sup>Pro</sup> [Protein Data Bank (PDB) ID code 7JPY] as the search model

using Phaser in the Phenix package.<sup>1,3</sup> *JLigand* and *Sketcher* from the CCP4 suite were employed for the generation of PDB and geometric restraints for the inhibitors. The inhibitors were built into the Fo-Fc density by using *Coot*.<sup>4</sup> Refinement of all the structures was performed with Real-space Refinement in Phenix.<sup>3</sup> Details of data quality and structure refinement are summarized in Table S1. All structural figures were generated with PyMOL (<https://www.pymol.org>).

**Cellular M<sup>Pro</sup> Inhibition Potency Characterizations of MPIs.** We grew HEK 293T/17 cells in high-glucose DMEM with GlutaMAX supplement and 10% FBS in 10 cm culture plates under 37 °C and 5% CO<sub>2</sub> to 80-90% confluency and then transfected cells with the pLVX-M<sup>Pro</sup>-eGFP-2 plasmid. 30 mg/mL polyethyleneimine and the total of 8 µg of the plasmid in 500 µL opti-MEM media were used for transfection. We incubated transfected cells overnight. On the second day, we collected cells using 0.05% trypsin-EDTA to detach them from plates, resuspended collected cells in the original growth media, adjusted the cell density to  $5 \cdot 10^5$  cells/mL, added 500 µL adjusted cells to each well of a 48-well plate, and then added 100 µL of a drug solution in DMEM. We incubated treated cells under 37 °C and 5% CO<sub>2</sub> for 72 h. After 72 h incubation, cells were collected using trypsinization and centrifugation. We resuspended collected cells in 200 µL PBS and analyzed cells with fluorescence using a Cytoflex Research Flow Cytometer based on the size scatters (SSC-A and SSC-H) and forward scatter (FSC-A). We gated cells based on SSC-A and FSC-A then with SSC-A and SSC-H. Fluorescence was detected with excitation at 488 nm and emission at 525 nm. All collected data were converted to csv files and analyzed using a self-prepared MATLAB script for massive data processing. We sorted the FITC-A column from lowest to highest. A  $10^6$  cutoff was set to separate the column to two groups with higher than  $10^6$  as positive and lower than  $10^6$  as negative. We integrated the positive group and divided the total integrated fluorescence intensity by the total cell positive cell counts as Flu. Int. shown in all graphs. The standard deviation of positive fluorescence was calculated as well. All processed data were plotted and fitted to a four-parameter Hill equation in GraphPad 9.0 to obtain determined EC<sub>50</sub> values.

**The Synthesis of MPIs.** All reagents and solvents for the synthesis were purchased from commercial sources and used without purification. All glassware was flame-dried prior to use. Thin-layer chromatography (TLC) was carried out on aluminum plates coated with 60 F254 silica gel. TLC plates were visualized under UV light (254 or 365 nm) or stained with 5% phosphomolybdic acid. Normal phase column chromatography was carried out using a Yamazen Small Flash AKROS system. Analytical reverse phase HPLC was carried out on a Shimazu LC20 HPLC system with an analytical C18 column. Semipreparative HPLC was carried out the same system with a semipreparative C18 column. The mobile phases were H<sub>2</sub>O with 0.1% formic acid (A) and acetone with 0.1% formic acid (B). NMR spectra were recorded on a Bruker AVANCE Neo 400 MHz or Varian INOVA 300 MHz spectrometer in specified deuterated solvents. High-resolution electrospray mass spectrometry was carried out on a Thermo Scientific Q Exactive Focus system. The purity of all compounds was confirmed by NMR and analytic HPLC-UV as  $\epsilon$  95%.

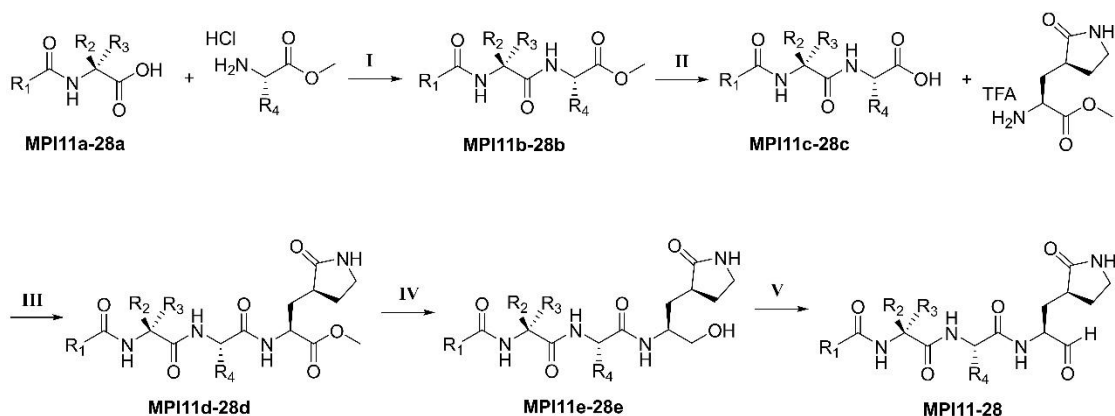

**Scheme S1.** General synthetic route to MPI11-28. Reagents and conditions: (I) HATU, DIPEA, DMF; (II) LiOH·H<sub>2</sub>O, THF/H<sub>2</sub>O; (III) HATU, DIPEA, DMP; (IV) LiBH<sub>4</sub>, THF; (V) DMP, DCM

**(S)-methyl 2-((S)-2-(((benzyloxy)carbonyl)amino)-3-methylbutanamido)-4,4-dimethylpentanoate (MPI11b).** Methyl (S)-2-amino-4,4-dimethylpentanoate hydrochloride (0.4 g, 2.27 mmol, 1.1 equiv) and *N*-Cbz-L-valine (0.52 g, 2.07 mmol, 1.0 equiv) were dissolved in dry DMF (20 mL) and the reaction was cooled to 0 °C. HATU (1.01 g, 2.69 mmol, 1.3 equiv) and DIPEA (1.46 mL, 8.28 mmol, 4.0 equiv) were added, and the reaction mixture was allowed warm up to room temperature and stirred for 12 h. The mixture was then poured into water (50 mL) and extracted with ethyl acetate (4×20 mL). The organic layer was washed with aqueous hydrochloric acid 10% v/v (2×20 mL), saturated aqueous NaHCO<sub>3</sub> (2×20 mL), brine (2×20 mL) and dried over Na<sub>2</sub>SO<sub>4</sub>. The organic phase was evaporated to dryness and the crude material purified by silica gel column chromatography (15-50% EtOAc in *n*-hexane as the eluent) to afford pure **MPI11b** as a white solid (0.6 g, 73%). <sup>1</sup>H NMR (400 MHz, Chloroform-*d*) δ 7.36 (m, 5H), 6.39 (m, 1H), 5.43 (t, *J* = 10.6 Hz, 1H), 5.12 (s, 2H), 4.65 (td, *J* = 8.5, 3.6 Hz, 1H), 4.04 (q, *J* = 7.2 Hz, 1H), 3.73 (s, 3H), 2.24 – 2.01 (m, 1H), 1.80 (dd, *J* = 14.2, 3.5 Hz, 1H), 1.50 (dd, *J* = 14.3, 8.7 Hz, 1H), 1.07 – 0.90 (m, 15H). <sup>13</sup>C NMR (100 MHz, Chloroform-*d*): δ 173.5, 170.9, 156.4, 136.26, 128.5, 128.2, 128.0, 77.4, 77.0, 76.7, 67.0, 60.3, 52.3, 49.8, 46.0, 31.1, 30.7, 29.5, 19.1, 17.9.

**(S)-2-((S)-2-(((benzyloxy)carbonyl)amino)-3-methylbutanamido)-4,4-dimethylpentanoic acid (MPI11c).** The **MPI11b** (600 mg, 1.53 mmol, 1.0 equiv) was dissolved in THF/H<sub>2</sub>O (1:1, 10 mL). LiOH·H<sub>2</sub>O (153 mg, 3.82 mmol, 2.5 equiv) was added at 0 °C. The mixture was stirred at room temperature overnight. Then THF was removed on vacuum and the aqueous layer was acidified with 1 M HCl and extracted with dichloromethane (3 x 10 mL). The organic layer was dried over anhydrous Na<sub>2</sub>SO<sub>4</sub> and concentrated to yield **MPI11c** as a white solid (415 mg, yield 70%). <sup>1</sup>H NMR (400 MHz, Chloroform-*d*) δ 9.42 (s, 1H), 7.26 (tdd, *J* = 9.1, 5.5, 2.5 Hz, 5H), 6.69 (d, *J* = 8.2 Hz, 1H), 5.82 (d, *J* = 9.3 Hz, 1H), 5.10 – 4.96 (m, 2H), 4.54 (td, *J* = 8.6, 3.2 Hz, 1H), 4.13 – 3.88 (m, 1H), 1.83 – 1.73 (m, 1H), 1.43 (dd, *J* = 14.7, 8.9 Hz, 1H), 1.18 (dt, *J* = 12.4, 7.1 Hz, 1H), 0.91 (s, 3H), 0.85 (m, 12H).

**(5S,8S,11S)-methyl 5-isopropyl-8-neopentyl-3,6,9-trioxo-11-(((S)-2-oxopyrrolidin-3-yl)methyl)-1-phenyl-2-oxa-4,7,10-triazadodecan-12-oate (MPI11d).** The methyl (S)-2-amino-3-((S)-2-oxopyrrolidin-3-yl)propanoate hydrochloride (110 mg, 0.494 mmol, 1.1 equiv) and the **MPI11c** (170 mg, 0.45 mmol, 1.0 equiv) were dissolved in anhydrous DMF (10 mL) and the reaction was cooled to

0 °C. HATU (222 mg, 0.585 mmol, 1.3 equiv) and DIPEA (0.32 mL, 1.81 mmol, 4.0 equiv) were added, and the reaction mixture was allowed to warm up to room temperature and stirred for 12 h. The mixture was then poured into water (20 mL) and extracted with ethyl acetate (4×20 mL). The organic layer was washed with aqueous hydrochloric acid 10% v/v (2×20 mL), saturated aqueous NaHCO<sub>3</sub> (2×20 mL), brine (2×20 mL) and dried over Na<sub>2</sub>SO<sub>4</sub>. The organic phase was evaporated to dryness and the crude material purified by silica gel column chromatography to afford pure **MPI11d** as a white solid (200 mg, yield 81%). <sup>1</sup>H NMR (400 MHz, Chloroform-*d*): δ 7.72 (d, *J* = 7.7 Hz, 1H), 7.32 – 7.21 (m, 5H), 6.88 – 6.60 (m, 2H), 5.47 (d, *J* = 9.2 Hz, 1H), 5.00 (s, 2H), 4.58 – 4.56 (m, 1H), 4.46 – 4.43 (m, 1H), 3.91 – 3.88 (m, 1H), 3.61 (s, 3H), 3.27 – 3.24 (m, 2H), 2.34 – 2.24 (m, 2H), 2.15 – 2.12 (m, 1H), 2.01 – 1.97 (m, 1H), 1.78 – 1.75 (m, 3H), 1.19 – 1.11 (m, 1H), 0.91 – 0.81 (m, 16H).

**Benzyl ((S)-1-(((S)-1-(((S)-1-hydroxy-3-((S)-2-oxopyrrolidin-3-yl)propan-2-yl)amino)-4,4-dimethyl-1-oxopentan-2-yl)amino)-3-methyl-1-oxobutan-2-yl)carbamate (MPI11e)**. To a stirred solution of **MPI11d** (150 mg, 0.27 mmol, 1.0 equiv) in anhydrous THF (8 mL) was added LiBH<sub>4</sub> (2.0 M in THF, 0.412 mL, 0.54 mmol, 2.0 equiv) in several portions at 0 °C. The reaction mixture was then allowed to warm up to room temperature and stirred for an additional 2 h. The reaction was quenched by the dropwise addition of 1.0 M HCl (aq) (1.2 mL) with cooling in an ice bath. Removed THF in vacuo, and the mixture was diluted with H<sub>2</sub>O and extracted with EtOAc, washed with sat. NaCl, dried over Na<sub>2</sub>SO<sub>4</sub> and concentrated. The residue was purified by column chromatography (6% MeOH in CH<sub>2</sub>Cl<sub>2</sub> as the eluent) to afford the pure product **MPI11e** as a white solid (102 mg, yield 71%). <sup>1</sup>H NMR (400 MHz, Chloroform-*d*): δ 7.84 (d, *J* = 9.3 Hz, 1H), 7.71 (d, *J* = 7.5 Hz, 1H), 7.28 – 7.24 (m, 5H), 6.86 (d, *J* = 4.4 Hz, 1H), 5.66 (d, *J* = 8.7 Hz, 1H), 5.07 – 4.94 (m, 2H), 4.60 – 4.58 (m, 1H), 4.08 (t, *J* = 8.2 Hz, 1H), 3.89 (dq, *J* = 11.9, 5.6 Hz, 1H), 3.77 (s, 1H), 3.59 (d, *J* = 10.9 Hz, 1H), 3.32 – 3.06 (m, 2H), 2.46 – 2.14 (m, 3H), 1.99 – 1.96 (m, 2H), 1.72 – 1.69 (m, 2H), 1.64 – 1.40 (m, 2H), 0.94 – 0.77 (m, 15H). <sup>13</sup>C NMR (100 MHz, CDCl<sub>3</sub>): δ 180.8, 173.6, 171.0, 156.6, 136.2, 128.5, 128.2, 128.0, 67.1, 65.3, 60.3, 51.1, 50.4, 46.6, 40.6, 38.2, 32.2, 31.4, 30.6, 29.6, 28.2, 19.1, 18.3.

**Benzyl ((S)-1-(((S)-4,4-dimethyl-1-oxo-1-(((S)-1-oxo-3-((S)-2-oxopyrrolidin-3-yl)propan-2-yl)amino)pentan-2-yl)amino)-3-methyl-1-oxobutan-2-yl)carbamate (MPI11)**. To a solution of **MPI11e** (90 mg, 0.17 mmol, 1.0 equiv) in anhydrous CH<sub>2</sub>Cl<sub>2</sub> (6 mL) was added NaHCO<sub>3</sub> (60 mg, 0.68 mmol, 4 equiv) and the Dess-Martin reagent (225 mg, 0.51 mmol, 3 equiv). The resulting mixture was stirred at RT for 12 h. Then the reaction was quenched with a saturated NaHCO<sub>3</sub> solution containing 10 % Na<sub>2</sub>S<sub>2</sub>O<sub>3</sub>. The layers were separated. The organic layer was then washed with saturated brine solution, dried over anhydrous Na<sub>2</sub>SO<sub>4</sub> and concentrated *on vacuum*. The residue was purified by column chromatography (6% MeOH in CH<sub>2</sub>Cl<sub>2</sub> as the eluent) to afford the pure product **MPI11** as a white solid (58 mg, yield 65%). <sup>1</sup>H NMR (400 MHz, Chloroform-*d*): δ 9.42 (s, 1H), 7.32 – 7.23 (m, 5H), 6.64 – 6.41 (m, 1H), 5.91 (d, *J* = 26.3 Hz, 1H), 5.43 (d, *J* = 8.9 Hz, 1H), 5.31 (d, *J* = 8.6 Hz, 1H), 5.03 (d, *J* = 7.8 Hz, 2H), 4.51 (dt, *J* = 8.6, 4.4 Hz, 1H), 4.26 (d, *J* = 7.0 Hz, 1H), 4.18 – 4.01 (m, 1H), 3.92 (dd, *J* = 8.4, 6.3 Hz, 1H), 3.29–3.26 (m, 2H), 2.44 – 2.25 (m, 2H), 2.16 – 2.05 (m, 1H), 1.91 – 1.87 (m, 2H), 1.80 – 1.73 (m, 1H), 1.58 – 1.54 (m, 2H), 1.02 – 0.73 (m, 15H). <sup>13</sup>C NMR (100 MHz, Chloroform-*d*): δ 199.5, 180.0, 173.8, 171.1, 156.6, 136.2, 128.5, 128.2, 128.0, 67.1, 60.6, 57.2, 50.9, 46.4, 40.6, 37.9, 31.0, 30.6, 29.9, 29.6, 28.2, 19.2, 18.1.

**(S)-methyl 2-((S)-2-(((benzyloxy)carbonyl)amino)-3-methylbutanamido)-4-methylpent-4-enoate (MPI12b).** MPI12b was prepared with methyl (S)-2-amino-4-methylpent-4-enoate hydrochloride and *N*-Cbz-L-valine as a white solid following a similar procedure to MPI11b (yield 40%). <sup>1</sup>H NMR (400 MHz, Chloroform-*d*): δ 7.41–7.28 (m, 5H), 6.19 (t, *J* = 5.8 Hz, 1H), 5.33 (d, *J* = 9.2 Hz, 1H), 5.11 (s, 2H), 4.83 (s, 1H), 4.73 (s, 1H), 4.67 (td, *J* = 8.0, 5.6 Hz, 1H), 4.08 – 3.95 (m, 1H), 3.72 (s, 3H), 2.55 (dd, *J* = 14.1, 5.4 Hz, 1H), 2.40 (dd, *J* = 14.0, 8.4 Hz, 1H), 2.14 (dt, *J* = 13.4, 7.0 Hz, 1H), 1.71 (s, 3H), 1.69–1.66 (m, 1H), 0.95 (dd, *J* = 18.8, 6.7 Hz, 6H). <sup>13</sup>C NMR (100 MHz, Chloroform-*d*): δ 172.3, 170.9, 156.3, 140.2, 136.2, 128.6, 128.2, 128.1, 114.9, 67.1, 60.2, 52.3, 50.5, 40.4, 31.2, 21.8, 21.1, 19.1, 17.7.

**(S)-2-((S)-2-(((benzyloxy)carbonyl)amino)-3-methylbutanamido)-4-methylpent-4-enoic acid (MPI12c).** MPI12c was prepared as a white solid following a similar procedure to MPI11c (yield 83%). <sup>1</sup>H NMR (400 MHz, Chloroform-*d*): δ 7.41 – 7.28 (m, 5H), 6.41 (d, *J* = 7.3 Hz, 1H), 5.44 (d, *J* = 9.1 Hz, 1H), 5.11 (s, 2H), 4.83 (s, 1H), 4.75 (s, 1H), 4.73 – 4.63 (m, 1H), 2.62 (dd, *J* = 14.2, 5.2 Hz, 1H), 2.43 (dd, *J* = 14.2, 8.7 Hz, 1H), 1.94 – 1.84 (m, 1H), 1.72 (s, 3H), 0.94 (dd, *J* = 16.9, 6.8 Hz, 6H). <sup>13</sup>C NMR (100 MHz, Chloroform-*d*): δ 174.8, 171.7, 156.6, 140.2, 136.1, 128.6, 128.3, 128.0, 127.0, 114.9, 68.0, 67.2, 60.3, 50.5, 40.0, 31.0, 25.6, 21.8, 19.1, 17.9.

**(5S,8S,11S)-methyl 5-isopropyl-8-(2-methylallyl)-3,6,9-trioxo-11-(((S)-2-oxopyrrolidin-3-yl)methyl)-1-phenyl-2-oxa-4,7,10-triazadodecan-12-oate (MPI12d).** MPI12d was prepared as a white solid following a similar procedure to MPI11d (yield 63%). <sup>1</sup>H NMR (400 MHz, Chloroform-*d*) δ 7.82 (d, *J* = 7.7 Hz, 1H), 7.41 – 7.28 (m, 5H), 7.06 (d, *J* = 8.5 Hz, 1H), 6.67 (s, 1H), 5.45 (d, *J* = 8.8 Hz, 1H), 5.09 (s, 2H), 4.75 (s, 1H), 4.71 (s, 1H), 4.54 (ddd, *J* = 11.6, 7.8, 3.4 Hz, 1H), 4.05 – 3.95 (m, 1H), 3.70 (s, 3H), 3.31 (p, *J* = 8.1, 6.7 Hz, 2H), 2.58 (dd, *J* = 14.1, 4.8 Hz, 1H), 2.45 – 2.28 (m, 3H), 2.25 – 2.05 (m, 2H), 1.90 – 1.73 (m, 2H), 1.72 (s, 3H), 0.91 (dd, *J* = 18.8, 6.8 Hz, 6H). <sup>13</sup>C NMR (100 MHz, Chloroform-*d*): δ 179.8, 172.0, 171.8, 171.2, 156.5, 140.9, 136.2, 128.6, 128.2, 128.0, 114.3, 67.1, 60.6, 52.4, 51.3, 41.1, 40.5, 38.3, 33.3, 30.9, 28.1, 21.9, 19.2, 18.6, 17.3.

**Benzyl ((S)-1-(((S)-1-(((S)-1-hydroxy-3-((S)-2-oxopyrrolidin-3-yl)propan-2-yl)amino)-4-methyl-1-oxopent-4-en-2-yl)amino)-3-methyl-1-oxobutan-2-yl)carbamate (MPI12e).** MPI12e was prepared as a white solid following a similar procedure to MPI11e (yield 70%). <sup>1</sup>H NMR (400 MHz, Methanol-*d*<sub>4</sub>) δ 7.36 – 7.15 (m, 5H), 5.01 (q, *J* = 12.5 Hz, 2H), 4.69 (d, *J* = 8.8 Hz, 2H), 4.41 (dd, *J* = 9.5, 5.6 Hz, 1H), 3.84 (dd, *J* = 16.3, 7.9 Hz, 2H), 3.44 (dd, *J* = 11.2, 5.4 Hz, 1H), 3.36 (dd, *J* = 11.0, 6.4 Hz, 1H), 3.20 – 3.12 (m, 2H), 2.50 – 2.16 (m, 4H), 2.00 – 1.80 (m, 2H), 1.65 (s, 4H), 1.45 (ddd, *J* = 14.2, 11.1, 3.1 Hz, 1H), 0.84 (dd, *J* = 11.7, 6.8 Hz, 6H). <sup>13</sup>C NMR (100 MHz, Methanol-*d*<sub>4</sub>) δ 181.2, 172.8, 172.6, 157.5, 141.0, 136.8, 128.1, 127.6, 127.5, 112.9, 66.5, 64.1, 61.0, 52.0, 49.3, 40.1, 39.4, 38.1, 32.2, 30.4, 27.6, 20.8, 18.3, 17.1.

**Benzyl ((S)-3-methyl-1-(((S)-4-methyl-1-oxo-1-(((S)-1-oxo-3-((S)-2-oxopyrrolidin-3-yl)propan-2-yl)amino)pent-4-en-2-yl)amino)-1-oxobutan-2-yl)carbamate (MPI12).** MPI12 was prepared as a white solid following a similar procedure to MPI11 (yield 60%). <sup>1</sup>H NMR (400 MHz, Chloroform-*d*) δ 9.48 (s, 1H), 8.33 – 8.20 (m, 1H), 7.42 – 7.29 (m, 5H), 6.63 (d, *J* = 7.8 Hz, 1H), 6.05 (s, 1H), 5.34 (d, *J* = 8.2 Hz, 1H), 5.10 (s, 2H), 4.82 (t, *J* = 1.7 Hz, 1H), 4.75 (s, 1H), 4.68 (td, *J* = 8.5, 5.7 Hz, 1H), 4.33 (d, *J* = 8.5 Hz, 1H), 4.02 (dd, *J* = 8.2, 5.8 Hz, 1H), 3.33 (dt, *J* = 8.9, 4.3 Hz, 2H), 2.62 (dd, *J* = 14.1, 5.5 Hz, 1H), 2.53 – 2.32 (m, 3H), 2.21 – 2.09 (m, 1H), 2.05 – 1.88 (m, 2H), 1.87 – 1.82 (m, 1H), 1.75 (s, 3H), 0.93 (dd, *J* = 23.8, 6.8 Hz, 6H).

$^{13}\text{C}$  NMR (100 MHz, Chloroform-*d*):  $\delta$  199.7, 180.0, 172.4, 171.4, 156.6, 140.8, 136.2, 128.5, 128.2, 128.0, 114.4, 67.1, 60.6, 57.5, 51.4, 41.0, 40.6, 38.0, 30.9, 29.9, 28.3, 21.9, 19.2, 17.7.

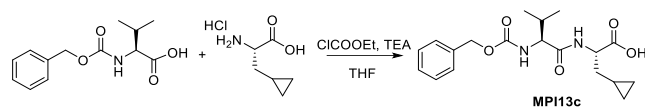

**(S)-2-((S)-2-(((benzyloxy)carbonyl)amino)-3-methylbutanamido)-3-cyclopropylpropanoic acid (MPI13c).** *N*-Cbz-L-valine (500 mg, 2.0 mmol, 1.0 equiv), ethyl chloroformate (268  $\mu\text{L}$ , 2.8 mmol, 1.4 equiv) and TEA (836  $\mu\text{L}$ , 6.0 mmol, 3.0 equiv) were dissolved in anhydrous THF (30 mL). After stirring at 0  $^{\circ}\text{C}$  for 0.5 h, L-cyclopropylalanine (386 mg, 4.0 mmol, 1.5 equiv) in water was added. The reaction mixture was stirred for 0.5 h at 0  $^{\circ}\text{C}$ . The THF was removed in vacuo and the aqueous layer was acidified with 1.0 M HCl. The aqueous layer was extracted with ethyl acetate. The combined organic layers were dried over anhydrous  $\text{Na}_2\text{SO}_4$ , filtered and concentrated. The residue was recrystallized from  $\text{CHCl}_3$  and hexane to yield the pure product **MPI13c** as a white solid (380 mg, yield 52%).

**Methyl (5S,8S,11S)-8-(cyclopropylmethyl)-5-isopropyl-3,6,9-trioxo-11-(((S)-2-oxopyrrolidin-3-yl)methyl)-1-phenyl-2-oxa-4,7,10-triazadodecan-12-oate (MPI13d).** **MPI13d** was prepared as a white solid following a similar procedure to **MPI11d** (yield 51%).

**Benzyl ((S)-1-(((S)-3-cyclopropyl-1-(((S)-1-hydroxy-3-((S)-2-oxopyrrolidin-3-yl)propan-2-yl)amino)-1-oxopropan-2-yl)amino)-3-methyl-1-oxobutan-2-yl)carbamate (MPI13e).** **MPI13e** was prepared as a white solid following a similar procedure to **MPI11e** (yield 75%).  $^1\text{H}$  NMR (400 MHz, Methanol-*d*<sub>4</sub>)  $\delta$  7.3 – 7.1 (m, 5H), 5.0 (d,  $J = 4.1$  Hz, 2H), 4.3 (t,  $J = 7.3$  Hz, 1H), 3.9 (d,  $J = 7.3$  Hz, 2H), 3.5 – 3.3 (m, 2H), 3.1 (dt,  $J = 16.3, 5.5$  Hz, 2H), 2.4 (dd,  $J = 14.7, 6.6$  Hz, 1H), 2.2 (dt,  $J = 15.7, 7.8$  Hz, 1H), 2.0 – 1.8 (m, 2H), 1.6 (dq,  $J = 20.5, 7.7, 7.0$  Hz, 2H), 1.5 – 1.3 (m, 2H), 0.8 (dd,  $J = 9.4, 6.7$  Hz, 6H), 0.7 (p,  $J = 6.9$  Hz, 1H), 0.3 (t,  $J = 10.5$  Hz, 2H), 0.0 (dq,  $J = 7.5, 4.0$  Hz, 2H).  $^{13}\text{C}$  NMR (100 MHz, Methanol-*d*<sub>4</sub>)  $\delta$  181.3, 172.9, 172.7, 157.4, 136.8, 128.1, 127.6, 127.5, 66.4, 64.1, 60.7, 54.3, 49.1, 40.1, 38.1, 36.6, 32.2, 30.6, 27.6, 18.4, 17.3, 7.3, 3.8, 3.6.

**Benzyl ((S)-1-(((S)-3-cyclopropyl-1-oxo-1-(((S)-1-oxo-3-((S)-2-oxopyrrolidin-3-yl)propan-2-yl)amino)propan-2-yl)amino)-3-methyl-1-oxobutan-2-yl)carbamate (MPI13).** **MPI13** was prepared as a white solid following a similar procedure to **MPI11** (yield 50%).  $^1\text{H}$  NMR (400 MHz, Chloroform-*d*)  $\delta$  9.4 (s, 1H), 8.3 (d,  $J = 6.5$  Hz, 1H), 7.2 (s, 5H), 7.2 (s, 1H), 6.6 (d,  $J = 23.9$  Hz, 1H), 5.7 – 5.5 (m, 1H), 5.1 – 4.9 (m, 2H), 4.6 (dq,  $J = 18.1, 9.9, 8.6$  Hz, 1H), 4.4 – 4.2 (m, 1H), 4.0 (h,  $J = 6.9, 5.7$  Hz, 1H), 3.3 (s, 1H), 3.2 (d,  $J = 10.8$  Hz, 1H), 2.4 (t,  $J = 8.4$  Hz, 1H), 2.3 (s, 1H), 2.1 (s, 1H), 2.0 (dp,  $J = 25.6, 9.2, 7.8$  Hz, 2H), 1.9 – 1.6 (m, 2H), 1.5 – 1.4 (m, 1H), 0.8 (dd,  $J = 12.2, 6.6$  Hz, 6H), 0.7 – 0.5 (m, 1H), 0.3 (t,  $J = 9.5$  Hz, 2H).  $^{13}\text{C}$  NMR (100 MHz, Chloroform-*d*)  $\delta$  199.5, 180.0, 172.7, 171.3, 156.6, 136.2, 128.5, 128.2, 128.0, 67.1, 60.5, 53.7, 50.7, 40.6, 38.0, 37.6, 31.1, 29.8, 28.4, 19.2, 17.9, 7.3, 4.5, 4.4.

**Methyl (S)-2-((S)-2-(((benzyloxy)carbonyl)amino)-3-methylbutanamido)-3-(furan-2-yl)propanoate (MPI14b).** **MPI14b** was prepared with methyl (S)-2-amino-3-(furan-2-yl)propanoate hydrochloride and *N*-Cbz-L-valine as a white solid following a similar procedure to **MPI11b** (yield 80%).  $^1\text{H}$  NMR (400 MHz, Methanol-*d*<sub>4</sub>)  $\delta$  7.32 – 7.09 (m, 6H), 6.15 (dd,  $J = 3.2, 1.9$  Hz, 1H), 6.02 (d,  $J = 3.2$  Hz, 1H), 4.99 (s, 2H), 4.59 (dd,  $J = 8.1, 5.5$  Hz, 1H), 3.84 (d,  $J = 7.1$  Hz, 1H), 3.59 (s, 3H), 3.14 – 2.90 (m,

2H), 2.02 – 1.77 (m, 1H), 0.82 (dd,  $J = 11.5, 6.8$  Hz, 6H).  $^{13}\text{C}$  NMR (100 MHz, Methanol- $d_4$ )  $\delta$  172.73, 171.40, 150.58, 141.76, 128.09, 127.46, 109.92, 107.20, 48.25, 48.04, 47.82, 47.61, 47.40, 47.19, 46.97, 30.61, 29.49, 18.25.

**(S)-2-((S)-2-(((benzyloxy)carbonyl)amino)-3-methylbutanamido)-3-(furan-2-yl)propanoic acid (MPI14c).** MPI14c was prepared as a white solid following a similar procedure to MPI11c (yield 88%).  $^1\text{H}$  NMR (400 MHz, Methanol- $d_4$ )  $\delta$  7.30 – 7.14 (m, 6H), 6.19 – 6.08 (m, 1H), 6.02 (d,  $J = 3.2$  Hz, 1H), 4.98 (s, 2H), 4.58 (dd,  $J = 8.2, 5.0$  Hz, 1H), 3.92 – 3.76 (m, 1H), 3.11 (dd,  $J = 15.3, 5.1$  Hz, 1H), 2.97 (dd,  $J = 15.3, 8.2$  Hz, 1H), 1.99 – 1.82 (m, 1H), 0.82 (dd,  $J = 14.3, 6.8$  Hz, 6H).  $^{13}\text{C}$  NMR (100 MHz, Methanol- $d_4$ )  $\delta$  172.61, 172.49, 150.87, 141.63, 128.10, 127.63, 127.45, 109.89, 107.09, 66.31, 60.59, 48.27, 48.06, 47.84, 47.63, 47.42, 47.21, 46.99, 30.63, 18.32.

**Methyl (5S,8S,11S)-8-(furan-2-ylmethyl)-5-isopropyl-3,6,9-trioxo-11-(((S)-2-oxopyrrolidin-3-yl)methyl)-1-phenyl-2-oxa-4,7,10-triazadodecan-12-oate (MPI14d).** MPI14d was prepared as a white solid following a similar procedure to MPI11d (yield 80%).  $^1\text{H}$  NMR (400 MHz, Chloroform- $d$ )  $\delta$  7.67 (d,  $J = 7.2$  Hz, 1H), 7.38 – 7.22 (m, 5H), 6.90 (d,  $J = 7.9$  Hz, 1H), 6.23 – 6.11 (m, 1H), 6.03 (d,  $J = 3.2$  Hz, 1H), 5.86 (s, 1H), 5.26 (d,  $J = 8.0$  Hz, 1H), 5.04 (d,  $J = 5.1$  Hz, 2H), 4.74 (d,  $J = 7.3$  Hz, 1H), 4.45 (s, 1H), 3.95 (t,  $J = 7.1$  Hz, 1H), 3.64 (s, 3H), 3.24 (d,  $J = 8.8$  Hz, 1H), 3.17 – 3.01 (m, 2H), 2.31 (s, 1H), 2.19 (s, 1H), 2.07 (dd,  $J = 13.3, 6.9$  Hz, 2H), 1.86 – 1.68 (m, 2H), 1.60 (s, 3H), 1.41 (d,  $J = 22.6$  Hz, 4H), 0.96 – 0.74 (m, 6H).

**Benzyl ((S)-1-(((S)-3-(furan-2-yl)-1-(((S)-1-hydroxy-3-((S)-2-oxopyrrolidin-3-yl)propan-2-yl)amino)-1-oxopropan-2-yl)amino)-3-methyl-1-oxobutan-2-yl)carbamate (MPI14e).** MPI14e was prepared as a white solid following a similar procedure to MPI11e (yield 37%).  $^1\text{H}$  NMR (400 MHz, Methanol- $d_4$ )  $\delta$  7.25 (s, 6H), 6.24 – 6.14 (m, 1H), 6.05 (d,  $J = 3.1$  Hz, 1H), 5.09 – 4.86 (m, 2H), 4.52 (d,  $J = 7.9$  Hz, 2H), 3.80 (t,  $J = 9.6$  Hz, 2H), 3.48 – 3.25 (m, 2H), 3.11 – 2.88 (m, 2H), 2.39 – 2.02 (m, 2H), 2.03 – 1.73 (m, 2H), 1.73 – 1.55 (m, 1H), 1.51 – 1.32 (m, 1H), 1.26 (dd,  $J = 6.8, 2.3$  Hz, 1H), 0.80 (dd,  $J = 9.1, 6.5$  Hz, 6H).  $^{13}\text{C}$  NMR (100 MHz, Methanol- $d_4$ )  $\delta$  181.23, 172.74, 171.62, 157.61, 151.02, 141.73, 136.74, 128.10, 127.66, 127.57, 109.96, 107.24, 66.57, 64.01, 61.10, 52.89, 48.26, 48.05, 47.83, 47.62, 47.41, 47.20, 46.98, 40.11, 38.05, 32.13, 29.99 (d,  $J = 65.0$  Hz), 27.59, 18.23, 17.08.

**Benzyl ((S)-1-(((S)-3-(furan-2-yl)-1-oxo-1-(((S)-1-oxo-3-((S)-2-oxopyrrolidin-3-yl)propan-2-yl)amino)propan-2-yl)amino)-3-methyl-1-oxobutan-2-yl)carbamate (MPI14).** MPI14 was prepared as a white solid following a similar procedure to MPI11 (yield 80%).  $^1\text{H}$  NMR (400 MHz, Chloroform- $d$ )  $\delta$  9.34 (s, 1H), 8.22 (d,  $J = 6.8$  Hz, 1H), 7.27 (q,  $J = 7.8, 5.8$  Hz, 5H), 7.02 (d,  $J = 8.1$  Hz, 1H), 6.16 (d,  $J = 2.5$  Hz, 2H), 6.03 (d,  $J = 3.1$  Hz, 1H), 5.40 (t,  $J = 11.0$  Hz, 1H), 5.03 (d,  $J = 6.8$  Hz, 2H), 4.79 (q,  $J = 6.7$  Hz, 1H), 4.22 (d,  $J = 10.4$  Hz, 1H), 4.00 – 3.88 (m, 1H), 2.25 (s, 2H), 2.17 – 2.02 (m, 1H), 1.76 (d,  $J = 35.2$  Hz, 5H), 0.84 (dd,  $J = 25.3, 6.8$  Hz, 6H).  $^{13}\text{C}$  NMR (100 MHz, Chloroform- $d$ )  $\delta$  199.96, 179.97, 171.32, 171.18, 150.71, 142.04, 136.11, 128.60, 128.29, 128.11, 110.41, 108.07, 67.26, 52.41, 50.86, 40.56, 30.70, 28.57, 19.26, 17.59.

**Methyl (S)-2-((S)-2-(((benzyloxy)carbonyl)amino)-3-methylbutanamido)-3-(thiophen-2-yl)propanoate (MPI15b).** MPI15b was prepared with methyl (S)-2-amino-3-(thiophen-2-yl)propanoate and *N*-Cbz-L-valine as a white solid following a similar procedure to MPI11b (yield 72%).  $^1\text{H}$  NMR (400 MHz, Methanol- $d_4$ )  $\delta$  7.37 – 7.13 (m, 5H), 7.11 – 7.03 (m, 1H), 6.78 (dd,  $J = 4.6, 2.9$  Hz, 2H), 4.99 (d,  $J = 2.9$  Hz, 2H), 4.58 (dd,  $J = 7.9, 5.3$  Hz, 1H), 3.90 – 3.74 (m, 1H), 3.60 (s, 3H), 3.27 (dd,  $J = 14.9, 5.3$  Hz, 1H), 3.21 – 3.12 (m, 3H), 1.91 (s, 1H), 0.82 (dd,  $J = 8.4, 6.7$  Hz, 6H).  $^{13}\text{C}$



NMR (100 MHz, Methanol-*d*<sub>4</sub>)  $\delta$  172.79, 171.25, 138.12, 136.86, 128.10, 127.63, 127.47, 66.30, 60.62, 53.75, 51.40, 48.26, 48.04, 47.83, 47.62, 47.41, 47.19, 46.98, 31.05, 30.62, 18.28, 17.13.

**(S)-2-(((S)-2-(((benzyloxy)carbonyl)amino)-3-methylbutanamido)-3-(thiophen-2-yl)propanoic acid (MPI15c).** MPI15c was prepared as a white solid following a similar procedure to MPI11c (yield 60%). <sup>1</sup>H NMR (400 MHz, Methanol-*d*<sub>4</sub>)  $\delta$  7.44 – 7.29 (m, 5H), 7.19 (dd, *J* = 4.9, 1.5 Hz, 1H), 6.97 – 6.83 (m, 2H), 5.12 (d, *J* = 2.6 Hz, 2H), 4.69 (dd, *J* = 7.9, 4.9 Hz, 1H), 3.99 (d, *J* = 7.1 Hz, 1H), 3.43 (dd, *J* = 15.0, 4.8 Hz, 1H), 3.31 – 3.22 (m, 1H), 2.14 – 1.93 (m, 1H), 1.08 – 0.86 (m, 6H).

**Methyl (5S,8S,11S)-5-isopropyl-3,6,9-trioxo-11-(((S)-2-oxopyrrolidin-3-yl)methyl)-1-phenyl-8-(thiophen-2-ylmethyl)-2-oxa-4,7,10-triazadodecan-12-oate (MPI15d).** MPI15d was prepared as a white solid following a similar procedure to MPI11d (yield 90%). <sup>1</sup>H NMR (400 MHz, Methanol-*d*<sub>4</sub>)  $\delta$  7.35 – 7.18 (m, 5H), 7.08 (dd, *J* = 5.0, 1.3 Hz, 1H), 6.84 – 6.70 (m, 1H), 5.03 – 4.95 (m, 2H), 4.58 – 4.48 (m, 1H), 4.44 – 4.32 (m, 1H), 3.88 – 3.73 (m, 1H), 3.60 (d, *J* = 6.3 Hz, 3H), 3.14 (d, *J* = 3.4 Hz, 2H), 2.39 – 2.25 (m, 1H), 2.24 – 2.09 (m, 1H), 2.10 – 2.01 (m, 1H), 1.99 – 1.83 (m, 1H), 1.67 (s, 2H), 1.19 (d, *J* = 3.6 Hz, 2H), 0.89 (dd, *J* = 9.1, 6.8 Hz, 2H), 0.78 (dd, *J* = 8.4, 6.7 Hz, 4H). <sup>13</sup>C NMR (100 MHz, Methanol-*d*<sub>4</sub>)  $\delta$  180.21, 172.65, 172.01, 171.69, 157.27, 138.44, 136.84, 128.14, 127.66, 127.51, 126.54, 126.36, 124.01, 66.40, 51.58, 50.54, 48.32, 48.11, 47.90, 47.69, 47.47, 47.26, 47.05, 32.51, 31.41, 27.30, 18.40, 17.21.

**Benzyl ((S)-1-(((S)-1-(((S)-1-hydroxy-3-((S)-2-oxopyrrolidin-3-yl)propan-2-yl)amino)-1-oxo-3-(thiophen-2-yl)propan-2-yl)amino)-3-methyl-1-oxobutan-2-yl)carbamate (MPI15e).** MPI15e was prepared as a white solid following a similar procedure to MPI11e (yield 53%). <sup>1</sup>H NMR (400 MHz, Methanol-*d*<sub>4</sub>)  $\delta$  7.32 – 7.15 (m, 5H), 7.10 (d, *J* = 4.8 Hz, 1H), 6.80 (d, *J* = 4.9 Hz, 2H), 5.08 – 4.88 (m, 2H), 4.48 (s, 1H), 3.80 (d, *J* = 6.7 Hz, 2H), 3.30 (d, *J* = 23.7 Hz, 2H), 3.17 – 3.00 (m, 3H), 2.24 (dd, *J* = 24.9, 14.9 Hz, 2H), 2.02 – 1.69 (m, 2H), 1.70 – 1.54 (m, 1H), 1.50 – 1.24 (m, 1H), 1.19 (s, 1H), 0.78 (t, *J* = 7.2 Hz, 6H).

**Benzyl ((S)-3-methyl-1-oxo-1-(((S)-1-oxo-1-(((S)-1-oxo-3-((S)-2-oxopyrrolidin-3-yl)propan-2-yl)amino)-3-(thiophen-2-yl)propan-2-yl)amino)butan-2-yl)carbamate (MPI15).** MPI15 was prepared as a white solid following a similar procedure to MPI11 (yield 60%). <sup>1</sup>H NMR (400 MHz, Chloroform-*d*)  $\delta$  9.30 (s, 1H), 8.24 (s, 1H), 7.38 – 7.22 (m, 4H), 7.04 (d, *J* = 5.0 Hz, 1H), 6.91 (d, *J* = 8.4 Hz, 1H), 6.87 – 6.65 (m, 2H), 5.97 (s, 1H), 5.33 (d, *J* = 8.2 Hz, 1H), 5.03 (s, 2H), 4.80 (d, *J* = 7.7 Hz, 1H), 4.20 (s, 1H), 3.97 (t, *J* = 7.2 Hz, 1H), 3.49 – 3.03 (m, 4H), 2.24 (s, 2H), 2.14 – 1.93 (m, 2H), 1.76 (d, *J* = 33.7 Hz, 3H), 0.83 (dd, *J* = 25.9, 6.7 Hz, 6H).

**Methyl (S)-2-((2S,3R)-2-(((benzyloxy)carbonyl)amino)-3-(tert-butoxy)butanamido)-4,4-dimethylpentanoate (MPI16b).** MPI16b was prepared with *Z*-Thr(*t*Bu)-OH and methyl (S)-2-amino-4,4-dimethylpentanoate hydrochloride as a white solid following a similar procedure to MPI11b (yield 83%). <sup>1</sup>H NMR (400 MHz, Chloroform-*d*)  $\delta$  7.5 (d, *J* = 8.1 Hz, 1H), 7.3 (d, *J* = 4.2 Hz, 5H), 5.9 (d, *J* = 4.3 Hz, 1H), 5.1 – 4.9 (m, 2H), 4.5 (td, *J* = 9.0, 3.2 Hz, 1H), 4.1 (d, *J* = 5.0 Hz, 2H), 3.6 (s, 3H), 1.7 (dd, *J* = 14.5, 3.2 Hz, 1H), 1.4 (dd, *J* = 14.5, 9.4 Hz, 1H), 1.1 (d, *J* = 74.2 Hz, 12H), 0.9 (s, 9H). <sup>13</sup>C NMR (100 MHz, Chloroform-*d*)  $\delta$  173.2, 169.2, 156.1, 136.3, 128.5, 128.1, 127.9, 75.6, 66.9, 66.8, 58.4, 52.2, 50.3, 45.7, 30.7, 29.7, 28.2, 16.2.

**(S)-2-((2S,3R)-2-(((benzyloxy)carbonyl)amino)-3-(tert-butoxy)butanamido)-4,4-dimethylpentanoic acid (MPI16c).** MPI16c was prepared as a white solid following a similar procedure to MPI11c (yield 82%).

**Methyl (5S,8S,11S)-5-((R)-1-(tert-butoxy)ethyl)-8-(cyclopropylmethyl)-3,6,9-trioxo-11-(((S)-2-oxopyrrolidin-3-yl)methyl)-1-phenyl-2-oxa-4,7,10-triazadodecan-12-oate (MPI16d).** MPI16d was prepared as a white solid following a similar procedure to MPI11d (yield 66%). <sup>1</sup>H NMR (400 MHz, Chloroform-*d*) δ 7.9 (d, *J* = 7.5 Hz, 1H), 7.5 (d, *J* = 8.4 Hz, 1H), 7.2 (q, *J* = 8.0, 6.1 Hz, 5H), 7.2 (s, 1H), 6.0 (d, *J* = 5.5 Hz, 1H), 5.0 (q, *J* = 12.3 Hz, 2H), 4.5 (td, *J* = 8.4, 4.1 Hz, 1H), 4.4 (ddd, *J* = 11.9, 7.4, 3.5 Hz, 1H), 4.1 (p, *J* = 4.2 Hz, 2H), 3.6 (s, 3H), 3.2 (dd, *J* = 20.8, 9.1 Hz, 2H), 2.3 (qd, *J* = 9.9, 3.9 Hz, 1H), 2.2 – 2.1 (m, 2H), 1.8 – 1.6 (m, 3H), 1.4 (dd, *J* = 14.5, 8.6 Hz, 1H), 1.3 – 0.9 (m, 12H), 0.9 (s, 9H). <sup>13</sup>C NMR (100 MHz, Chloroform-*d*) δ 179.6, 172.5, 172.0, 168.9, 155.9, 136.0, 128.3, 128.0, 127.8, 75.3, 66.7, 66.7, 58.6, 52.0, 50.9, 50.7, 45.8, 40.3, 38.0, 32.8, 30.2, 29.6, 28.0, 27.6, 16.8.

**Benzyl ((2S,3R)-3-(tert-butoxy)-1-(((S)-1-(((S)-1-hydroxy-3-((S)-2-oxopyrrolidin-3-yl)propan-2-yl)amino)-4,4-dimethyl-1-oxopentan-2-yl)amino)-1-oxobutan-2-yl)carbamate (MPI16e).** MPI16e was prepared as a white solid following a similar procedure to MPI11e (yield 66%). <sup>1</sup>H NMR (400 MHz, Chloroform-*d*) δ 8.1 (d, *J* = 8.7 Hz, 1H), 7.5 (d, *J* = 8.0 Hz, 1H), 7.3 – 7.1 (m, 6H), 6.8 (s, 1H), 5.1 – 4.9 (m, 2H), 4.4 (q, *J* = 6.9 Hz, 2H), 4.1 (dd, *J* = 6.3, 3.8 Hz, 1H), 4.0 – 3.9 (m, 1H), 3.9 (q, *J* = 10.1, 9.2 Hz, 1H), 3.6 – 3.4 (m, 2H), 3.1 (dtd, *J* = 17.2, 9.3, 8.7, 5.0 Hz, 2H), 2.4 – 2.1 (m, 3H), 1.8 – 1.6 (m, 2H), 1.3 (dd, *J* = 14.3, 6.9 Hz, 2H), 1.2 (s, 9H), 0.9 (d, *J* = 6.3 Hz, 3H), 0.8 (s, 9H). <sup>13</sup>C NMR (100 MHz, Chloroform-*d*) δ 181.7, 172.7, 169.0, 156.3, 136.3, 128.4, 128.0, 127.9, 75.6, 67.2, 66.7, 65.2, 58.6, 53.4, 51.2, 49.1, 45.4, 40.5, 38.5, 33.9, 30.2, 29.5, 28.1, 16.5.

**Benzyl ((2S,3R)-3-(tert-butoxy)-1-(((S)-4,4-dimethyl-1-oxo-1-(((S)-1-oxo-3-((S)-2-oxopyrrolidin-3-yl)propan-2-yl)amino)pentan-2-yl)amino)-1-oxobutan-2-yl)carbamate (MPI16).** MPI16 was prepared as a white solid following a similar procedure to MPI11 (yield 40%). <sup>1</sup>H NMR (400 MHz, Chloroform-*d*) δ 9.4 (s, 1H), 8.1 (d, *J* = 6.6 Hz, 1H), 7.5 (d, *J* = 8.3 Hz, 1H), 7.3 – 7.2 (m, 5H), 6.8 (s, 1H), 5.9 (d, *J* = 5.1 Hz, 1H), 5.0 (q, *J* = 12.2 Hz, 2H), 4.5 (td, *J* = 8.5, 4.1 Hz, 1H), 4.3 (dq, *J* = 10.8, 5.4, 4.8 Hz, 1H), 4.1 (d, *J* = 5.8 Hz, 2H), 3.3 – 3.1 (m, 2H), 2.3 (p, *J* = 8.3 Hz, 1H), 2.3 – 2.2 (m, 1H), 1.9 (td, *J* = 12.4, 10.2, 5.7 Hz, 1H), 1.8 (ddt, *J* = 11.8, 8.3, 3.9 Hz, 2H), 1.7 (tt, *J* = 12.3, 6.2 Hz, 1H), 1.4 (dd, *J* = 14.4, 8.6 Hz, 1H), 1.1 (d, *J* = 81.8 Hz, 12H), 0.9 (d, *J* = 7.3 Hz, 9H). <sup>13</sup>C NMR (100 MHz, Chloroform-*d*) δ 199.6, 180.0, 173.3, 169.3, 156.2, 136.2, 128.6, 128.2, 128.1, 75.6, 67.0, 66.8, 58.9, 57.3, 51.2, 46.1, 40.5, 37.8, 30.5, 29.9, 29.8, 29.7, 28.2, 17.0.

**Methyl (S)-2-((2S,3R)-2-(((benzyloxy)carbonyl)amino)-3-(tert-butoxy)butanamido)-3-cyclopropylpropanoate (MPI17b).** MPI17b was prepared with *Z*-Thr(*t*Bu)-OH and methyl (S)-2-amino-3-cyclopropylpropanoate hydrochloride as a white solid following a similar procedure to MPI11b (yield 79%). <sup>1</sup>H NMR (400 MHz, Chloroform-*d*) δ 7.7 (d, *J* = 7.5 Hz, 1H), 7.3 (d, *J* = 4.3 Hz, 5H), 5.9 (d, *J* = 5.3 Hz, 1H), 5.1 – 5.0 (m, 2H), 4.6 (q, *J* = 6.3 Hz, 1H), 4.2 – 4.1 (m, 2H), 3.7 (s, 3H), 1.6 (ddt, *J* = 27.6, 13.9, 7.1 Hz, 2H), 1.2 (s, 8H), 1.0 (d, *J* = 6.4 Hz, 4H), 0.6 (p, *J* = 6.3 Hz, 1H), 0.4 (d, *J* = 8.1 Hz, 2H), -0.0 (q, *J* = 8.7, 7.3 Hz, 2H). <sup>13</sup>C NMR (100 MHz, Chloroform-*d*) δ 172.2, 169.0, 156.0, 136.2, 128.4, 128.0, 127.9, 75.4, 66.8, 66.7, 58.5, 52.7, 52.0, 36.9, 28.1, 16.5, 6.9, 4.2, 4.0.

**(S)-2-((2S,3R)-2-(((benzyloxy)carbonyl)amino)-3-(tert-butoxy)butanamido)-3-cyclopropylpropanoic acid (MPI17c).** MPI17c was prepared as a white solid following a similar procedure to MPI11c (yield 90%).

**Methyl (5S,8S,11S)-5-((R)-1-(tert-butoxy)ethyl)-8-(cyclopropylmethyl)-3,6,9-trioxo-11-(((S)-2-oxopyrrolidin-3-yl)methyl)-1-phenyl-2-oxa-4,7,10-triazadodecan-12-oate (MPI17d).** MPI17d was prepared as a white solid following a similar procedure to MPI11d (yield 60%). <sup>1</sup>H NMR (400 MHz, Chloroform-*d*) δ 7.8 (d, *J* = 7.4 Hz, 1H), 7.6 (d, *J* = 7.9 Hz, 1H), 7.2 (d, *J* = 12.4 Hz, 5H), 7.0 (s, 1H), 5.9 (d, *J* = 6.0 Hz, 1H), 5.0 (t, *J* = 10.8 Hz, 2H), 4.5 (q, *J* = 7.1 Hz, 1H), 4.4 (ddd, *J* = 11.4, 7.7, 3.8 Hz, 1H), 4.1 – 4.0 (m, 2H), 3.6 (s, 3H), 3.2 (dt, *J* = 16.5, 9.1 Hz, 2H), 2.3 (ddq, *J* = 28.6, 13.9, 7.6 Hz, 2H), 2.1 (ddd, *J* = 15.6, 11.7, 4.2 Hz, 1H), 1.8 – 1.6 (m, 2H), 1.6 (q, *J* = 7.7 Hz, 2H), 1.2 (s, 8H), 1.0 (d, *J* = 6.2 Hz, 4H), 0.7 (td, *J* = 8.0, 4.2 Hz, 1H), 0.4 (dd, *J* = 8.1, 5.0 Hz, 2H), 0.0 (d, *J* = 4.9 Hz, 2H). <sup>13</sup>C NMR (100 MHz, Chloroform-*d*) δ 179.8, 172.1, 171.7, 169.2, 156.1, 136.2, 128.5, 128.1, 128.0, 75.2, 66.8, 58.9, 53.6, 53.5, 52.2, 50.9, 40.4, 38.2, 37.6, 33.0, 28.2, 27.9, 17.3, 7.1, 4.4, 4.2.

**Benzyl ((2S,3R)-3-(tert-butoxy)-1-(((S)-3-cyclopropyl-1-(((S)-1-hydroxy-3-((S)-2-oxopyrrolidin-3-yl)propan-2-yl)amino)-1-oxopropan-2-yl)amino)-1-oxobutan-2-yl)carbamate (MPI17e).** MPI17e was prepared as a white solid following a similar procedure to MPI11e (yield 85%). <sup>1</sup>H NMR (400 MHz, Chloroform-*d*) δ 7.6 (t, *J* = 7.0 Hz, 2H), 7.3 (d, *J* = 4.3 Hz, 5H), 7.0 (s, 1H), 6.1 (d, *J* = 6.3 Hz, 1H), 5.1 – 4.9 (m, 2H), 4.4 (t, *J* = 7.2 Hz, 1H), 4.2 (d, *J* = 6.6 Hz, 1H), 4.2 – 4.0 (m, 2H), 4.0 (ddt, *J* = 13.4, 9.3, 4.5 Hz, 1H), 3.6 – 3.4 (m, 2H), 3.2 (s, 2H), 2.4 – 2.2 (m, 2H), 2.0 (d, *J* = 12.4 Hz, 1H), 1.8 – 1.4 (m, 4H), 1.1 (d, *J* = 66.6 Hz, 12H), 0.6 (t, *J* = 7.0 Hz, 1H), 0.4 (q, *J* = 8.3, 7.4 Hz, 2H), 0.0 (s, 2H). <sup>13</sup>C NMR (100 MHz, Chloroform-*d*) δ 181.0, 171.8, 169.4, 156.2, 136.1, 128.4, 128.1, 128.0, 75.1, 67.8, 66.8, 65.1, 59.1, 54.0, 49.7, 40.5, 38.2, 37.3, 32.4, 28.1, 28.0, 17.6, 7.2, 4.3, 4.3.

**Benzyl ((2S,3R)-3-(tert-butoxy)-1-(((S)-3-cyclopropyl-1-oxo-1-(((S)-1-oxo-3-((S)-2-oxopyrrolidin-3-yl)propan-2-yl)amino)propan-2-yl)amino)-1-oxobutan-2-yl)carbamate (MPI17).** MPI17 was prepared as a white solid following a similar procedure to MPI11 (yield 54%). <sup>1</sup>H NMR (400 MHz, Chloroform-*d*) δ 9.4 (s, 1H), 8.1 (d, *J* = 6.3 Hz, 1H), 7.5 (t, *J* = 8.6 Hz, 1H), 7.3 (s, 5H), 6.4 – 6.1 (m, 1H), 5.9 (d, *J* = 5.4 Hz, 1H), 5.0 (q, *J* = 12.3 Hz, 2H), 4.4 (dt, *J* = 34.9, 6.6 Hz, 1H), 4.3 (p, *J* = 5.6, 4.6 Hz, 1H), 4.1 (t, *J* = 5.9 Hz, 2H), 3.3 (d, *J* = 8.6 Hz, 1H), 3.2 – 3.2 (m, 1H), 2.3 (d, *J* = 14.0 Hz, 1H), 2.2 (s, 2H), 2.0 – 1.9 (m, 1H), 1.9 (t, *J* = 6.8 Hz, 1H), 1.7 (dt, *J* = 15.4, 8.5 Hz, 1H), 1.6 (dd, *J* = 12.9, 6.3 Hz, 1H), 1.1 (d, *J* = 72.7 Hz, 12H), 0.7 (d, *J* = 9.1 Hz, 1H), 0.4 (q, *J* = 8.5 Hz, 2H), 0.0 (d, *J* = 5.1 Hz, 2H). <sup>13</sup>C NMR (100 MHz, Chloroform-*d*) δ 199.7, 180.1, 172.4, 169.6, 156.3, 136.2, 128.7, 128.4, 128.2, 75.5, 67.1, 66.9, 59.2, 57.7, 55.0, 40.6, 38.0, 37.5, 29.9, 28.6, 28.3, 17.7, 7.4, 4.7, 4.5.

**(S)-methyl 2-((S)-2-(((benzyloxy)carbonyl)amino)-3,3-dimethylbutanamido)-4,4-dimethylpentanoate (MPI18b).** MPI18b was prepared with Cbz-L-tert-leucine and methyl (S)-2-amino-4,4-dimethylpentanoate hydrochloride as a white solid following a similar procedure to MPI11b (yield 81%). <sup>1</sup>H NMR (400 MHz, Chloroform-*d*) δ 7.40 – 7.19 (m, 5H), 6.51 – 6.17 (m, 1H), 5.64 – 5.46 (m, 1H), 5.09 (s, 2H), 4.74 – 4.54 (m, 1H), 4.06 – 3.96 (m, 1H), 3.70 (d, *J* = 2.5 Hz, 3H), 1.83 – 1.74 (m, 1H), 1.52 – 1.38 (m, 1H), 1.00 (d, *J* = 2.4 Hz, 9H), 0.91 (d, *J* = 2.6 Hz, 9H). <sup>13</sup>C NMR (100 MHz, Chloroform-*d*): δ 173.5, 170.2, 156.4, 136.3, 128.5, 128.1, 127.92, 127.90, 66.9, 60.4, 52.3, 49.7, 46.1, 34.8, 30.7, 29.4, 26.4, 21.1.

**(S)-2-((S)-2-(((benzyloxy)carbonyl)amino)-3,3-dimethylbutanamido)-4,4-dimethylpentanoic acid (MPI18c).** MPI18c was prepared as a white solid following a similar procedure to MPI11c (yield 79%). <sup>1</sup>H NMR (400 MHz, Chloroform-*d*): δ 7.40 – 7.27 (m, 5H), 7.03 – 6.56 (m, 1H), 5.85 (s, 1H), 5.08 (q, *J* = 12.5 Hz, 2H), 4.64 – 4.42 (m, 1H), 4.14 – 3.94 (m, 1H), 1.85 – 1.72 (m, 1H), 1.59 – 1.43 (m, 1H), 0.94 (s, 9H), 0.89 (s, 9H).

**(5S,8S,11S)-methyl 5-(tert-butyl)-8-neopentyl-3,6,9-trioxo-11-(((S)-2-oxopyrrolidin-3-yl)methyl)-1-phenyl-2-oxa-4,7,10-triazadodecan-12-oate (MPI18d).** MPI18d was prepared as a white solid following a similar procedure to MPI11d (yield 60%). <sup>1</sup>H NMR (400 MHz, Chloroform-*d*): δ 7.73 (d, *J* = 8.2 Hz, 1H), 7.60 (d, *J* = 9.0 Hz, 1H), 7.38 – 7.27 (m, 5H), 7.18 – 7.08 (m, 1H), 5.62 (d, *J* = 9.8 Hz, 1H), 5.06 (d, *J* = 2.4 Hz, 2H), 4.75 – 4.61 (m, 1H), 4.61 – 4.50 (m, 1H), 4.00 (dd, *J* = 9.6, 5.3 Hz, 1H), 3.67 (s, 3H), 3.41 – 3.21 (m, 2H), 2.51 – 2.32 (m, 2H), 2.29 – 2.16 (m, 1H), 1.94 – 1.74 (m, 3H), 1.49 – 1.44 (m, 1H), 0.96 (s, 9H), 0.89 (s, 9H). <sup>13</sup>C NMR (100 MHz, Chloroform-*d*): δ 179.9, 173.0, 171.9, 170.2, 156.6, 136.3, 128.5, 128.5, 128.2, 128.1, 127.9, 67.0, 62.7, 55.5, 52.3, 50.8, 50.5, 46.8, 40.6, 38.2, 34.6, 30.6, 29.5, 27.8, 26.5, 26.4.

**Benzyl ((S)-1-(((S)-1-(((S)-1-hydroxy-3-((S)-2-oxopyrrolidin-3-yl)propan-2-yl)amino)-4,4-dimethyl-1-oxopentan-2-yl)amino)-3,3-dimethyl-1-oxobutan-2-yl)carbamate (MPI18e).** MPI18e was prepared as a white solid following a similar procedure to MPI11e (yield 67%). <sup>1</sup>H NMR (400 MHz, Chloroform-*d*): δ 8.73 – 8.45 (m, 1H), 8.15 – 7.94 (m, 1H), 7.62 – 7.43 (m, 1H), 7.42 – 7.25 (H), 5.83 – 5.63 (m, 1H), 5.07 (d, *J* = 4.2 Hz, 2H), 4.93 – 4.75 (m, 1H), 4.49 – 4.33 (m, 1H), 4.01 – 3.85 (m, 1H), 3.85 – 3.67 (m, 1H), 3.51 – 3.22 (m, 3H), 3.22 – 3.03 (m, 1H), 2.35 – 2.23 (m, 1H), 2.20 – 2.10 (m, 1H), 1.90 – 1.55 (m, 4H), 1.55 – 1.37 (m, 1H), 0.93 (s, 9H), 0.90 (s, 9H). <sup>13</sup>C NMR (100 MHz, Chloroform-*d*): δ 180.3, 173.5, 169.8, 156.5, 136.2, 128.6, 128.5, 128.2, 128.1, 128.0, 67.2, 65.0, 61.7, 53.4, 50.5, 47.2, 40.5, 38.2, 35.3, 34.8, 30.6, 29.6, 26.5.

**Benzyl ((S)-1-(((S)-4,4-dimethyl-1-oxo-1-(((S)-1-oxo-3-((S)-2-oxopyrrolidin-3-yl)propan-2-yl)amino)pentan-2-yl)amino)-3,3-dimethyl-1-oxobutan-2-yl)carbamate (MPI18).** MPI18 was prepared as a white solid following a similar procedure to MPI11 (yield 67%). <sup>1</sup>H NMR (400 MHz, Chloroform-*d*) δ 9.50 (s, 1H), 8.16 – 7.99 (m, 1H), 7.42 – 7.28 (m., 5H), 6.90 – 6.74(m, 1H), 5.55 (dd, *J* = 22.5, 9.6 Hz, 1H), 5.08 (d, *J* = 2.7 Hz, 2H), 4.72 – 4.58 (m, 1H), 4.38 (dd, *J* = 10.6, 5.9 Hz, 1H), 3.96 (dd, *J* = 13.1, 9.4 Hz, 1H), 3.47 – 3.25 (m, 2H), 2.51 – 2.29 (m, 2H), 2.09 – 1.77 (m, 4H), 1.53 – 1.43 (m, 1H), 1.13 – 0.71 (m, 18H). <sup>13</sup>C NMR (100 MHz, Chloroform-*d*): δ 199.3, 18.0, 173.7, 170.3, 156.5, 136.3, 128.5, 128.2, 127.9, 67.1, 62.6, 57.0, 50.8, 46.6, 40.5, 37.8, 36.5, 34.7, 30.6, 29.9, 29.5, 28.0, 26.5.

**Methyl (S)-2-((S)-2-(((benzyloxy)carbonyl)amino)-3,3-dimethylbutanamido)-3-cyclopropylpropanoate (MPI19b).** MPI19b was prepared with Cbz-L-tert-leucine and methyl (S)-2-amino-3-cyclopropylpropanoate hydrochloride as a colorless oil following a similar procedure to MPI11b (yield 73%).

**(S)-2-((S)-2-(((benzyloxy)carbonyl)amino)-3,3-dimethylbutanamido)-3-cyclopropylpropanoic acid (MPI19c).** MPI19c was prepared as a white solid following a similar procedure to MPI11c (yield 82%). <sup>1</sup>H NMR (400 MHz, Chloroform-*d*) δ 7.41 – 7.28 (m, 5H), 6.89 (d, *J* = 7.6 Hz, 1H), 5.85 (d, *J* = 9.7 Hz, 1H), 5.10 (s, 2H), 4.67 (q, *J* = 7.7, 6.3 Hz, 1H), 4.16 (d, *J* = 9.7 Hz, 1H), 1.72 (dtd, *J* = 27.3,

13.9, 6.4 Hz, 2H), 0.99 (s, 9H), 0.67 (pd,  $J = 7.5, 3.7$  Hz, 1H), 0.42 (td,  $J = 8.1, 5.0$  Hz, 2H), 0.07 (td,  $J = 4.7, 2.3$  Hz, 2H).

**Methyl (5S,8S,11S)-5-(tert-butyl)-8-(cyclopropylmethyl)-3,6,9-trioxo-11-(((S)-2-oxopyrrolidin-3-yl)methyl)-1-phenyl-2-oxa-4,7,10-triazadodecan-12-oate**

**(MPI19d).** MPI19d was prepared as a white solid following a similar procedure to MPI11d (yield 64%).  $^1\text{H}$  NMR (400 MHz, Chloroform-*d*)  $\delta$  7.80 (d,  $J = 7.4$  Hz, 1H), 7.41 – 7.28 (m, 5H), 6.96 (d,  $J = 8.3$  Hz, 1H), 6.33 (d,  $J = 9.9$  Hz, 1H), 5.55 (t,  $J = 10.4$  Hz, 1H), 5.09 (s, 2H), 4.67 – 4.48 (m, 2H), 3.96 (t,  $J = 9.2$  Hz, 1H), 3.71 (s, 3H), 3.43 – 3.27 (m, 2H), 2.53 – 2.32 (m, 2H), 2.17 (ddd,  $J = 16.5, 12.2, 4.8$  Hz, 1H), 1.87 (dddd,  $J = 17.6, 11.4, 8.6, 2.9$  Hz, 1H), 1.80 – 1.68 (m, 2H), 1.60 (dt,  $J = 13.9, 7.0$  Hz, 1H), 0.99 (s, 9H), 0.73 (td,  $J = 7.5, 3.9$  Hz, 1H), 0.42 (ddq,  $J = 11.4, 7.7, 3.8$  Hz, 2H), 0.16 – 0.01 (m, 2H).

**Benzyl ((S)-1-(((S)-3-cyclopropyl-1-(((S)-1-hydroxy-3-((S)-2-oxopyrrolidin-3-yl)propan-2-yl)amino)-1-oxopropan-2-yl)amino)-3,3-dimethyl-1-oxobutan-2-yl)carbamate (MPI19e).** MPI19e was prepared as a white solid following a similar procedure to MPI11e. It was used in the next step without further purification.

**Benzyl ((S)-1-(((S)-3-cyclopropyl-1-oxo-1-(((S)-1-oxo-3-((S)-2-oxopyrrolidin-3-yl)propan-2-yl)amino)propan-2-yl)amino)-3,3-dimethyl-1-oxobutan-2-yl)carbamate (MPI19).**

**MPI19** was prepared as a white solid following a similar procedure to MPI11 (yield 48%).  $^1\text{H}$  NMR (400 MHz, Chloroform-*d*)  $\delta$  9.51 (s, 1H), 8.20 (d,  $J = 6.7$  Hz, 1H), 7.32 (d,  $J = 4.2$  Hz, 5H), 7.17 (d,  $J = 8.3$  Hz, 1H), 6.67 (s, 1H), 5.68 (d,  $J = 9.4$  Hz, 1H), 5.08 (s, 2H), 4.67 (q,  $J = 7.3$  Hz, 1H), 4.42 (p,  $J = 4.9$  Hz, 1H), 4.02 (d,  $J = 9.4$  Hz, 1H), 3.31 (dq,  $J = 17.4, 9.5$  Hz, 2H), 2.44 (p,  $J = 8.1$  Hz, 1H), 2.34 (dt,  $J = 14.9, 8.5$  Hz, 1H), 2.07 – 1.86 (m, 2H), 1.86 – 1.74 (m, 1H), 1.65 (ddt,  $J = 20.5, 13.6, 6.9$  Hz, 2H), 0.98 (s, 9H), 0.70 (h,  $J = 7.1, 6.6$  Hz, 1H), 0.43 (d,  $J = 8.0$  Hz, 2H), 0.08 (d,  $J = 5.1$  Hz, 2H).  $^{13}\text{C}$  NMR (100 MHz, Chloroform-*d*)  $\delta$  199.3, 180.0, 172.6, 170.4, 156.6, 136.3, 128.5, 128.2, 128.0, 77.3, 67.1, 62.9, 57.4, 53.7, 40.6, 37.9, 37.7, 34.7, 29.9, 28.4, 26.5, 7.3, 4.5, 4.3.

**(S)-methyl 2-((S)-2-(((benzyloxy)carbonyl)amino)-2-cyclopropylacetamido)-4,4-dimethylpentanoate (MPI20b).** MPI20b was obtained from methyl (S)-2-amino-4,4-dimethylpentanoate hydrochloride and (S)-2-(((benzyloxy)carbonyl)amino)-2-cyclopropylacetic acid following a similar procedure to MPI11b. The crude product was purified by silica gel column chromatography (15-50% EtOAc in *n*-hexane) to afford the MPI20b as a white solid (yield 80%).  $^1\text{H}$  NMR (400 MHz, Chloroform-*d*):  $\delta$  7.42 – 7.28 (m, 5H), 6.53 – 6.37 (m, 1H), 5.63 – 5.44 (m, 1H), 5.09 (s, 2H), 4.64 (td,  $J = 8.7, 3.5$  Hz, 1H), 3.71 (s, 3H), 3.68 – 3.60 (m, 1H), 1.77 (dd,  $J = 14.4, 3.6$  Hz, 1H), 1.48 (dd,  $J = 14.4, 8.8$  Hz, 1H), 1.22 – 1.07 (m, 1H), 0.93 (s, 9H), 0.72 – 0.41 (m, 4H).  $^{13}\text{C}$  NMR (100 MHz, Chloroform-*d*):  $\delta$  173.59, 170.61, 156.26, 136.20, 128.54, 128.17, 128.03, 67.06, 60.43, 52.39, 49.90, 46.06, 30.72, 29.50, 14.21, 3.60, 2.99.

**(S)-2-((S)-2-(((benzyloxy)carbonyl)amino)-2-cyclopropylacetamido)-4,4-dimethylpentanoic acid (MPI20c).**

**MPI20c** was prepared as a white solid following a similar procedure to MPI11c (yield 83%).  $^1\text{H}$  NMR (400 MHz, Chloroform-*d*)  $\delta$  7.41 – 7.29 (m, 5H), 6.61 (d,  $J = 8.2$  Hz, 1H), 5.72 (d,  $J = 7.6$  Hz, 1H), 5.09 (s, 2H), 4.62 (td,  $J = 8.7, 3.0$  Hz, 1H), 3.72 – 3.55 (m, 1H), 1.91 – 1.81 (m, 1H), 1.51 (dd,  $J = 14.5, 9.1$  Hz, 1H), 1.20 – 1.06 (m, 1H), 0.94 (s, 9H), 0.69 – 0.36 (m, 4H).  $^{13}\text{C}$  NMR (100 MHz, Chloroform-*d*):  $\delta$  176.37, 171.31, 156.49, 136.06, 128.56, 128.24, 128.06, 67.97, 67.24, 50.01, 45.68, 30.77, 29.49, 25.61, 13.90, 3.66, 3.15.

**(5S,8S,11S)-methyl 5-cyclopropyl-8-neopentyl-3,6,9-trioxo-11-(((S)-2-oxopyrrolidin-3-yl)methyl)-1-phenyl-2-oxa-4,7,10-triazadodecan-12-oate**

**(MPI20d).** MPI20d was prepared as a white solid following a similar procedure to MPI11d (yield 49%). <sup>1</sup>H NMR (400 MHz, Chloroform-*d*): δ 7.89 – 7.74 (m, 1H), 7.30 – 7.19 (m, 5H), 6.75 (s, 1H), 5.85 – 5.67 (m, 1H), 5.00 (d, *J* = 5.2 Hz, 2H), 4.55 (td, *J* = 8.7, 3.5 Hz, 1H), 4.49 – 4.34 (m, 1H), 3.61 (s, 3H), 3.60 – 3.52 (m, 1H), 3.28 – 3.14 (m, 2H), 2.39 – 2.19 (m, 2H), 2.11 (td, *J* = 12.7, 11.7, 4.1 Hz, 1H), 1.87 – 1.61 (m, 3H), 1.12 – 0.98 (m, 1H), 0.85 (s, 9H), 0.57 – 0.23 (m, 4H). <sup>13</sup>C NMR (100 MHz, Chloroform-*d*): δ 179.90, 173.11, 172.07, 170.88, 156.30, 136.24, 128.52, 128.15, 128.00, 67.02, 58.86, 55.27, 52.36, 50.89, 45.93, 40.57, 38.33, 30.55, 29.60, 28.01, 12.47, 3.30, 3.18.

**Benzyl ((S)-1-cyclopropyl-2-(((S)-1-(((S)-1-hydroxy-3-((S)-2-oxopyrrolidin-3-yl)propan-2-yl)amino)-4,4-dimethyl-1-oxopentan-2-yl)amino)-2-oxoethyl)carbamate (MPI20e).**

MPI20e was prepared as a white solid following a similar procedure to MPI11e (yield 79%). <sup>1</sup>H NMR (400 MHz, Chloroform-*d*): δ 7.70 – 7.42 (m, 2H), 7.38 – 7.21 (m, 5H), 6.79 (d, *J* = 5.1 Hz, 1H), 6.16 – 5.91 (m, 1H), 5.05 (q, *J* = 12.4 Hz, 2H), 4.62 – 4.43 (m, 1H), 4.06 – 3.87 (m, 1H), 3.63 – 3.54 (m, 2H), 3.24 (t, *J* = 9.2 Hz, 2H), 2.44 – 2.22 (m, 2H), 1.91 – 1.68 (m, 2H), 1.62 – 1.44 (m, 2H), 1.17 – 1.02 (m, 1H), 0.90 (s, 9H), 0.57 – 0.42 (m, 3H), 0.42 – 0.30 (m, 1H).

**Benzyl ((S)-1-cyclopropyl-2-(((S)-4,4-dimethyl-1-oxo-1-(((S)-1-oxo-3-((S)-2-oxopyrrolidin-3-yl)propan-2-yl)amino)pentan-2-yl)amino)-2-oxoethyl)carbamate (MPI20).**

MPI20 was prepared as a white solid following a similar procedure to MPI11 (yield 62%). <sup>1</sup>H NMR (400 MHz, Chloroform-*d*): δ 9.48 (s, 1H), 8.22 (s, 1H), 7.40 – 7.27 (m, 5H), 7.06 – 6.87 (m, 1H), 6.51 – 6.29 (m, 1H), 5.78 (s, 1H), 5.07 (s, 2H), 4.68 – 4.52 (m, 1H), 4.36 – 4.24 (m, 1H), 3.56 (ddd, *J* = 9.2, 7.0, 2.4 Hz, 1H), 3.36 – 3.19 (m, 2H), 2.50 – 2.28 (m, 2H), 2.07 – 1.84 (m, 4H), 1.84 – 1.72 (m, 1H), 1.21 – 1.07 (m, 1H), 0.95 (s, 9H), 0.66 – 0.35 (m, 4H). <sup>13</sup>C NMR (100 MHz, Chloroform-*d*): δ 199.77, 180.13, 173.80, 171.01, 156.44, 136.16, 128.55, 128.21, 128.04, 67.10, 59.12, 57.47, 51.03, 45.90, 40.59, 38.03, 30.62, 30.01, 29.64, 28.29, 13.85, 3.29, 3.22.

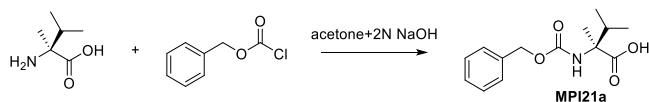

**(S)-2-(((benzyloxy)carbonyl)amino)-2,3-dimethylbutanoic acid (MPI21a).** H-L-( $\alpha$ Me)Val-OH (1.0 g, 7.63 mmol, 1.0 equiv) was dissolved in a 1:1 mixture of 1N NaOH (20 mL) : acetone (20 mL) and kept at 0 °C . Z-Cl (1.25 mL, 0.877 mmol, 0.1 equiv), diluted in acetone (5 mL), was added drop wise in 40 min and the pH was adjusted to 10.8-11.0 with 2N NaOH. After stirring the reaction mixture at room temperature for 5 h, Acetone was evaporated under reduce pressure and NaOH 2 N was added (20 mL). The unreacted Z-Cl was extracted with Et<sub>2</sub>O. The aqueous solution was acidified with KHSO<sub>4</sub>, the product was extracted with EtOAc (4x30 mL). The organic phase was washed with water (3x30 mL), and the solvent was evaporated at reduced pressure. The solid colorless product was obtained in 76% yield. <sup>1</sup>H NMR (400 MHz, Chloroform-*d*): δ 10.38, 7.38, 7.37, 7.36, 7.36, 7.35, 7.34, 7.33, 5.46, 5.12, 1.61, 1.03, 1.01, 0.99, 0.98.

**(S)-methyl 2-(((benzyloxy)carbonyl)amino)-2,3-dimethylbutanamido)-4,4-dimethylpentanoate (MPI21b).** MPI21b was obtained from methyl (S)-2-amino-4,4-dimethylpentanoate hydrochloride and MPI21a following a similar procedure to MPI11b. The crude product was purified by silica gel column chromatography (15-

50% EtOAc in n-hexane) to afford the **MPI21b** as a white solid (yield 78%). <sup>1</sup>H NMR (400 MHz, Chloroform-*d*) δ 7.53 – 7.30 (m, 5H), 6.93 (s, 1H), 5.24 (s, 1H), 5.13 – 5.01 (m, 2H), 4.68 – 4.51 (m, 1H), 3.68 (s, 3H), 1.77 (dd, *J* = 14.4, 3.6 Hz, 1H), 1.50 (dd, *J* = 14.5, 8.9 Hz, 1H), 1.45 (s, 3H), 1.08 – 0.67 (m, 15H).

**(S)-2-(((S)-2-(((benzyloxy)carbonyl)amino)-2,3-dimethylbutanamido)-4,4-dimethylpentanoic acid (MPI21c).** **MPI21c** was prepared as a white solid following a similar procedure to **MPI11c**. The crude **MPI21c** was used in the next step without further purification.

**(5S,8S,11S)-methyl 5-isopropyl-5-methyl-8-neopentyl-3,6,9-trioxo-11-(((S)-2-oxopyrrolidin-3-yl)methyl)-1-phenyl-2-oxa-4,7,10-triazadodecan-12-oate (MPI21d).** **MPI21d** was prepared as a white solid following a similar procedure to **MPI11d** (yield 63%). <sup>1</sup>H NMR (400 MHz, Methanol-*d*<sub>4</sub>) δ 8.35 (d, *J* = 8.1 Hz, 1H), 7.67 (d, *J* = 8.0 Hz, 1H), 7.37 – 7.13 (m, 5H), 6.93 (s, 1H), 5.14 – 4.93 (m, 2H), 4.43 – 4.19 (m, 2H), 3.60 (s, 3H), 3.20 – 3.10 (m, 2H), 2.45 – 2.33 (m, 1H), 2.28 – 2.18 (m, 1H), 1.97 – 1.87 (m, 1H), 1.77 – 1.61 (m, 3H), 1.50 (dd, *J* = 14.4, 8.3 Hz, 1H), 1.32 (s, 3H), 0.93 – 0.62 (m, 15H). <sup>13</sup>C NMR (100 MHz, Methanol-*d*<sub>4</sub>): δ 180.36, 174.44, 174.38, 172.08, 156.83, 136.80, 128.18, 128.09, 127.65, 127.62, 66.51, 62.93, 54.47, 51.65, 51.37, 50.73, 44.60, 42.43, 40.04, 38.06, 30.08, 28.71, 17.34, 17.12, 16.55, 16.16, 15.90.

**Benzyl ((S)-1-(((S)-1-(((S)-1-hydroxy-3-((S)-2-oxopyrrolidin-3-yl)propan-2-yl)amino)-4,4-dimethyl-1-oxopentan-2-yl)amino)-2,3-dimethyl-1-oxobutan-2-yl)carbamate (MPI21e).** **MPI21e** was prepared as a white solid following a similar procedure to **MPI11e** (yield 70%). <sup>1</sup>H NMR (400 MHz, Chloroform-*d*) δ 7.41 – 7.27 (m, 5H), 6.56 (d, *J* = 6.3 Hz, 1H), 5.99 (s, 1H), 5.47 (s, 1H), 5.22 – 5.07 (m, 2H), 4.23 (ddd, *J* = 9.1, 6.2, 2.4 Hz, 1H), 4.03 (s, 1H), 3.74 – 3.64 (m, 1H), 3.63 – 3.54 (m, 1H), 3.36 – 3.19 (m, 2H), 2.46 – 2.29 (m, 2H), 2.22 – 1.96 (m, 2H), 2.01 – 1.88 (m, 2H), 1.76 (dd, *J* = 12.2, 9.0 Hz, 1H), 1.41 (s, 3H), 1.29 (dd, *J* = 14.7, 9.6 Hz, 1H), 1.02 – 0.77 (m, 15H). <sup>13</sup>C NMR (100 MHz, Chloroform-*d*): δ 180.44, 173.62, 173.41, 156.25, 135.91, 128.67, 128.46, 128.37, 67.62, 65.70, 63.37, 53.46, 53.04, 50.63, 45.80, 40.33, 35.36, 32.36, 30.69, 29.69, 28.38, 17.45, 17.33, 17.11, 17.00.

**Benzyl ((S)-1-(((S)-4,4-dimethyl-1-oxo-1-(((S)-1-oxo-3-((S)-2-oxopyrrolidin-3-yl)propan-2-yl)amino)pentan-2-yl)amino)-2,3-dimethyl-1-oxobutan-2-yl)carbamate (MPI21).** **MPI21** was prepared as a white solid following a similar procedure to **MPI11** (yield 78%). <sup>1</sup>H NMR (400 MHz, Chloroform-*d*) δ 9.52 (s, 1H), 8.07 (d, *J* = 7.7 Hz, 1H), 7.50 – 7.26 (m, 5H), 6.77 (d, *J* = 7.4 Hz, 1H), 6.39 – 6.20 (m, 1H), 5.47 (s, 1H), 5.07 (d, *J* = 3.2 Hz, 2H), 4.57 – 4.37 (m, 1H), 4.33 – 4.16 (m, 1H), 3.35 – 3.18 (m, 2H), 2.44 – 2.29 (m, 2H), 2.14 – 2.05 (m, 2H), 1.98 – 1.92 (m, 1H), 1.90 – 1.81 (m, 1H), 1.74 (t, *J* = 9.8 Hz, 1H), 1.40 (s, 3H), 0.97 – 0.85 (m, 15H). <sup>13</sup>C NMR (100 MHz, Chloroform-*d*): δ 200.59, 173.83, 173.43, 173.17, 156.23, 136.06, 128.70, 128.63, 128.35, 128.16, 67.48, 67.28, 63.36, 57.12, 51.83, 45.78, 40.35, 37.64, 34.88, 30.65, 30.24, 29.67, 28.12, 17.44, 17.36, 17.09, 17.04.

**Methyl (S)-2-(2-(((benzyloxy)carbonyl)amino)-2-methylpropanamido)-4,4-dimethylpentanoate (MPI22b).** **MPI22b** was obtained from methyl (S)-2-amino-4,4-dimethylpentanoate hydrochloride and Z-Aib-OH following a similar procedure to **MPI11b**. The crude product was purified by silica gel column chromatography (15-50% EtOAc in hexanes as the eluent) to afford the **MPI22b** as a colorless oil (yield 79%). <sup>1</sup>H NMR (400 MHz, Chloroform-*d*) δ 7.34 (s, 5H), 6.68 (s, 1H), 5.31 (s, 1H),

5.08 (s, 2H), 4.57 (t,  $J = 8.4$  Hz, 1H), 3.69 (s, 3H), 1.91 – 1.64 (m, 2H), 1.53 (d,  $J = 6.0$  Hz, 6H), 0.94 (s, 9H).

**(S)-2-(2-(((benzyloxy)carbonyl)amino)-2-methylpropanamido)-4,4-dimethylpentanoic acid (MPI22c).** MPI22c was prepared as a white solid following a similar procedure to MPI11c (yield 85%).

**Methyl (8S,11S)-5,5-dimethyl-8-neopentyl-3,6,9-trioxo-11-(((S)-2-oxopyrrolidin-3-yl)methyl)-1-phenyl-2-oxa-4,7,10-triazadodecan-12-oate (MPI22d).** MPI22d was prepared as a white solid following a similar procedure to MPI11d (yield 66%).  $^1\text{H}$  NMR (400 MHz, Chloroform-*d*)  $\delta$  7.81 (d,  $J = 7.8$  Hz, 1H), 7.41 – 7.29 (m, 5H), 6.67 (d,  $J = 8.2$  Hz, 1H), 5.77 (s, 1H), 5.43 (s, 1H), 5.17 – 5.01 (m, 2H), 4.63 – 4.43 (m, 2H), 3.71 (s, 3H), 3.40 – 3.16 (m, 2H), 2.48 – 2.32 (m, 2H), 2.30 – 2.16 (m, 1H), 2.15 – 1.95 (m, 1H), 1.95 – 1.82 (m, 2H), 1.52 (d,  $J = 11.7$  Hz, 6H), 1.49 – 1.36 (m, 1H), 0.95 (s, 9H).

**Benzyl (1-(((S)-1-(((S)-1-hydroxy-3-((S)-2-oxopyrrolidin-3-yl)propan-2-yl)amino)-4,4-dimethyl-1-oxopentan-2-yl)amino)-2-methyl-1-oxopropan-2-yl)carbamate (MPI22e).** MPI22e was prepared as a white solid following a similar procedure to MPI11e. The crude MPI22e was used in the next step without further purification.

**Benzyl (1-(((S)-4,4-dimethyl-1-oxo-1-(((S)-1-oxo-3-((S)-2-oxopyrrolidin-3-yl)propan-2-yl)amino)pentan-2-yl)amino)-2-methyl-1-oxopropan-2-yl)carbamate (MPI22).** MPI22 was prepared as a white solid following a similar procedure to MPI11 (yield 50%).  $^1\text{H}$  NMR (400 MHz, Chloroform-*d*)  $\delta$  9.52 (s, 1H), 8.15 (d,  $J = 7.6$  Hz, 1H), 7.33 (s, 5H), 6.83 (d,  $J = 8.0$  Hz, 1H), 6.12 (s, 1H), 5.71 (s, 1H), 5.05 (q,  $J = 12.2$  Hz, 2H), 4.58 – 4.42 (m, 1H), 4.23 (ddd,  $J = 11.3, 7.6, 3.9$  Hz, 1H), 3.33 – 3.16 (m, 2H), 2.49 – 2.29 (m, 2H), 2.13 – 1.97 (m, 2H), 1.96 – 1.82 (m, 2H), 1.82 – 1.68 (m, 1H), 1.47 (d,  $J = 6.8$  Hz, 6H), 0.94 (s, 9H).  $^{13}\text{C}$  NMR (100 MHz, Chloroform-*d*)  $\delta$  200.5, 180.0, 173.8, 156.0, 136.0, 128.6, 128.3, 128.1, 67.2, 57.3, 57.1, 51.6, 45.5, 40.4, 37.7, 30.7, 30.2, 29.6, 28.3, 26.0.

**Methyl (S)-2-(1-(((benzyloxy)carbonyl)amino)cyclopropane-1-carboxamido)-3-cyclohexylpropanoate (MPI23b).** MPI23b was obtained from H-Cha-OMe hydrochloride and 1-(((benzyloxy)carbonyl)amino)cyclopropane-1-carboxylic acid following a similar procedure to MPI11b. The crude product was purified by silica gel column chromatography (50-100% EtOAc in hexanes as the eluent) to afford the MPI23b.  $^1\text{H}$  NMR (400 MHz, Chloroform-*d*)  $\delta$  7.29 (d,  $J = 3.9$  Hz, 5H), 6.72 (s, 1H), 5.05 (d,  $J = 12.0$  Hz, 2H), 4.60 – 4.33 (m, 1H), 3.63 (s, 3H), 1.78 – 0.66 (m, 18H).  $^{13}\text{C}$  NMR (100 MHz, Chloroform-*d*)  $\delta$  173.61, 171.53, 135.97, 128.63, 52.27, 50.58, 40.06, 34.09, 33.38, 32.57, 26.35, 26.15, 25.98.

**(S)-2-(1-(((benzyloxy)carbonyl)amino)cyclopropane-1-carboxamido)-3-cyclohexylpropanoic acid (MPI23c).** MPI23c was prepared as a white solid following a similar procedure to MPI11c.  $^1\text{H}$  NMR (400 MHz, Chloroform-*d*)  $\delta$  7.26 (s, 5H), 6.84 (d,  $J = 11.3$  Hz, 1H), 5.80 (s, 1H), 5.25 – 4.94 (m, 2H), 4.49 (s, 1H), 1.59 (dd,  $J = 13.3, 6.7$  Hz, 6H), 1.51 – 1.24 (m, 3H), 1.20 (s, 2H), 1.06 – 0.91 (m, 4H), 0.81 (s, 3H).  $^{13}\text{C}$  NMR (100 MHz, Chloroform-*d*)  $\delta$  176.01, 172.64, 128.63, 128.35, 67.96, 50.83, 34.07, 33.40, 32.43, 29.72, 26.34, 26.13, 25.95, 25.60.

**Methyl (S)-2-((S)-2-(1-(((benzyloxy)carbonyl)amino)cyclopropane-1-carboxamido)-3-cyclohexylpropanamido)-3-((S)-2-oxopyrrolidin-3-yl)propanoate (MPI23d).** MPI23d was prepared as a white solid following a similar



procedure to **MPI11d** (yield 62%). <sup>1</sup>H NMR (400 MHz, Methanol-*d*<sub>4</sub>) δ 7.32 – 7.13 (m, 5H), 5.14 – 4.94 (m, 2H), 4.47 – 4.26 (m, 2H), 3.62 (s, 3H), 3.13 (d, *J* = 7.5 Hz, 2H), 2.39 (d, *J* = 10.3 Hz, 1H), 2.22 – 2.02 (m, 2H), 1.82 – 1.43 (m, 9H), 1.43 – 1.30 (m, 2H), 1.17 (d, *J* = 12.4 Hz, 2H), 1.11 (q, *J* = 8.4, 7.6 Hz, 2H), 0.96 (d, *J* = 8.3 Hz, 2H), 0.89 – 0.70 (m, 2H).

**Benzyl (1-(((S)-3-cyclohexyl-1-(((S)-1-hydroxy-3-((S)-2-oxopyrrolidin-3-yl)propan-2-yl)amino)-1-oxopropan-2-yl)carbamoyl)cyclopropyl)carbamate (MPI23e).** **MPI23e** was prepared as a white solid following a similar procedure to **MPI11e** (yield 61%). <sup>1</sup>H NMR (400 MHz, Methanol-*d*<sub>4</sub>) δ 7.32 – 7.09 (m, 5H), 5.09 (d, *J* = 12.4 Hz, 1H), 4.98 (d, *J* = 12.4 Hz, 1H), 4.35 (dd, *J* = 10.4, 4.9 Hz, 1H), 3.96 – 3.74 (m, 1H), 3.42 (dd, *J* = 11.5, 5.9 Hz, 2H), 2.37 – 2.14 (m, 2H), 1.87 (t, *J* = 12.5 Hz, 1H), 1.70 – 1.41 (m, 9H), 1.42 – 1.28 (m, 2H), 1.28 – 1.19 (m, 3H), 1.19 – 0.97 (m, 4H), 0.97 – 0.72 (m, 3H). <sup>13</sup>C NMR (100 MHz, Methanol-*d*<sub>4</sub>) δ 181.30, 173.80, 173.46, 136.60, 128.14, 127.59, 66.73, 64.06, 48.26, 48.05, 47.84, 47.63, 47.41, 47.20, 46.99, 40.16, 38.24, 35.21, 34.08, 33.57, 27.55, 26.19, 26.04, 25.80.

**Benzyl (1-(((S)-3-cyclohexyl-1-oxo-1-(((S)-1-oxo-3-((S)-2-oxopyrrolidin-3-yl)propan-2-yl)amino)propan-2-yl)carbamoyl)cyclopropyl)carbamate (MPI23).** **MPI23** was prepared as a white solid following a similar procedure to **MPI11** (yield 41%). <sup>1</sup>H NMR (400 MHz, Chloroform-*d*) δ 9.43 (d, *J* = 24.1 Hz, 1H), 8.30 (s, 1H), 7.27 (d, *J* = 4.2 Hz, 5H), 6.86 (d, *J* = 56.9 Hz, 1H), 6.25 (s, 1H), 5.88 (d, *J* = 34.9 Hz, 1H), 5.18 – 4.90 (m, 2H), 4.56 (q, *J* = 4.1 Hz, 1H), 4.51 – 4.35 (m, 1H), 4.20 (s, 1H), 3.24 (d, *J* = 10.0 Hz, 2H), 2.45 – 2.20 (m, 2H), 2.03 – 1.66 (m, 7H), 1.52 – 1.35 (m, 3H), 1.22 (d, *J* = 9.4 Hz, 1H), 1.14 – 1.00 (m, 4H), 0.98 – 0.67 (m, 4H).

**(S)-methyl 2-(((S)-2-(((benzyloxy)carbonyl)amino)-2-cyclopropylacetamido)-3-cyclopropylpropanoate (MPI24b).** **MPI24b** was obtained from methyl (S)-2-amino-3-cyclopropylpropanoate hydrochloride and (S)-2-(((benzyloxy)carbonyl)amino)-2-cyclopropylacetic acid following a similar procedure to **MPI11b**. The crude product was purified by silica gel column chromatography (15-50% EtOAc in hexanes as the eluent) to afford the **MPI24b** (yield 80%). <sup>1</sup>H NMR (400 MHz, Chloroform-*d*): δ 7.58 – 7.21 (m, 5H), 6.77 (s, 1H), 5.68 – 5.49 (m, 1H), 5.10 (s, 2H), 4.66 (q, *J* = 6.4 Hz, 1H), 3.75 (s, 3H), 3.71 – 3.59 (m, 1H), 1.70 (q, *J* = 6.4 Hz, 2H), 1.20 – 1.04 (m, 1H), 0.68 – 0.41 (m, 6H), 0.20 – -0.02 (m, 2H). <sup>13</sup>C NMR (100 MHz, Chloroform-*d*): δ 172.51, 171.10, 156.27, 136.21, 128.52, 128.15, 127.98, 67.05, 58.58, 52.79, 52.36, 36.91, 14.30, 6.82, 4.20, 4.10, 3.57, 3.16.

**(S)-2-(((S)-2-(((benzyloxy)carbonyl)amino)-2-cyclopropylacetamido)-3-cyclopropylpropanoic acid (MPI24c).** **MPI24c** was prepared as a white solid following a similar procedure to **MPI11c** (yield 85%). <sup>1</sup>H NMR (400 MHz, DMSO-*d*<sub>6</sub>) δ 7.96 (d, *J* = 7.9 Hz, 1H), 7.43 (d, *J* = 8.2 Hz, 1H), 7.34 – 7.16 (m, 5H), 4.96 (s, 2H), 4.23 (td, *J* = 7.8, 5.3 Hz, 1H), 3.57 (t, *J* = 8.3 Hz, 1H), 1.64 – 1.35 (m, 2H), 1.07 – 0.87 (m, 1H), 0.82 – 0.64 (m, 1H), 0.50 – 0.19 (m, 6H), 0.12 – -0.09 (m, 2H). <sup>13</sup>C NMR (100 MHz, DMSO-*d*<sub>6</sub>): δ 173.78, 171.30, 156.15, 137.51, 128.78, 128.22, 128.13, 65.83, 58.15, 52.78, 36.62, 14.20, 8.04, 4.85, 4.53, 3.54, 3.00.

**(5S,8S,11S)-methyl 5-cyclopropyl-8-(cyclopropylmethyl)-3,6,9-trioxo-11-(((S)-2-oxopyrrolidin-3-yl)methyl)-1-phenyl-2-oxa-4,7,10-triazadodecan-12-oate (MPI24d).** **MPI24d** was prepared as a white solid following a similar procedure to **MPI11d** (yield 50%). <sup>1</sup>H NMR (400 MHz, Chloroform-*d*): δ 8.03 (d, *J* = 7.2 Hz, 1H), 7.37 – 7.26 (m, 5H), 7.19 (d, *J* = 8.0 Hz, 1H), 6.53 (s, 1H), 5.83 (d, *J* = 7.4 Hz, 1H), 5.08 (d, *J* = 3.0 Hz, 2H), 4.63 (q, *J* = 7.1 Hz, 1H), 4.57 – 4.43 (m, 1H), 3.70 (s, 4H),

3.40 – 3.18 (m, 2H), 2.51 – 2.28 (m, 2H), 2.26 – 2.09 (m, 1H), 1.95 – 1.76 (m, 2H), 1.76 – 1.55 (m, 2H), 1.52 – 1.38 (m, 1H), 1.20 – 1.03 (m, 1H), 0.79 – 0.66 (m, 1H), 0.65 – 0.33 (m, 6H), 0.17 – -0.03 (m, 2H). <sup>13</sup>C NMR (100 MHz, Chloroform-*d*): δ 179.99, 172.09, 171.94, 170.97, 156.32, 136.26, 128.53, 128.15, 128.03, 67.01, 54.81, 53.65, 52.43, 51.53, 40.60, 38.51, 37.45, 33.14, 28.31, 14.36, 7.10, 4.49, 4.22, 3.49, 3.20.

**Benzyl ((S)-1-cyclopropyl-2-(((S)-3-cyclopropyl-1-(((S)-1-hydroxy-3-((S)-2-oxopyrrolidin-3-yl)propan-2-yl)amino)-1-oxopropan-2-yl)amino)-2-oxoethyl)carbamate (MPI24e).** MPI24e was prepared as a white solid following a similar procedure to MPI11e (yield 79%). <sup>1</sup>H NMR (400 MHz, Methanol-*d*<sub>4</sub>): δ 7.34 – 6.98 (m, 5H), 5.06 – 4.87 (m, 2H), 4.23 (d, *J* = 7.3 Hz, 1H), 3.85 (d, *J* = 10.5 Hz, 1H), 3.48 – 3.27 (m, 3H), 3.16 – 3.09 (m, 1H), 2.41 – 2.25 (m, 1H), 2.27 – 2.13 (m, 1H), 1.88 – 1.77 (m, 1H), 1.70 – 1.31 (m, 4H), 1.05 – 0.90 (m, 1H), 0.73 – 0.59 (m, 1H), 0.53 – 0.20 (m, 6H), 0.15 – -0.11 (m, 2H).

**Benzyl ((S)-1-cyclopropyl-2-(((S)-3-cyclopropyl-1-oxo-1-(((S)-1-oxo-3-((S)-2-oxopyrrolidin-3-yl)propan-2-yl)amino)propan-2-yl)amino)-2-oxoethyl)carbamate (MPI24).** MPI24 was prepared as a white solid following a similar procedure to MPI11 (yield 66%). <sup>1</sup>H NMR (400 MHz, DMSO-*d*<sub>6</sub>): δ 9.35 (s, 1H), 8.38 (d, *J* = 7.7 Hz, 1H), 7.91 (dd, *J* = 22.3, 7.8 Hz, 1H), 7.57 (s, 1H), 7.52 – 7.42 (m, 1H), 7.35 – 7.16 (m, 5H), 4.94 (s, 2H), 4.34 – 4.20 (m, 1H), 4.20 – 4.07 (m, 1H), 3.57 – 3.41 (m, 1H), 3.15 – 2.91 (m, 2H), 2.30 – 2.14 (m, 1H), 2.14 – 1.99 (m, 1H), 1.81 (q, *J* = 16.5, 14.7 Hz, 1H), 1.64 – 1.27 (m, 4H), 1.04 – 0.85 (m, 1H), 0.74 – 0.55 (m, 1H), 0.48 – 0.16 (m, 6H), 0.08 – -0.11 (m, 2H). <sup>13</sup>C NMR (100 MHz, DMSO-*d*<sub>6</sub>): δ 201.20, 178.70, 172.56, 171.22, 156.23, 137.50, 128.79, 128.24, 128.15, 65.84, 58.23, 56.67, 53.57, 37.63, 29.81, 27.74, 14.07, 8.05, 4.88, 4.69, 3.59, 2.87.

**(S)-methyl 2-((2S,3R)-2-(((benzyloxy)carbonyl)amino)-3-(tert-butoxy)butanamido)-3-cyclohexylpropanoate (MPI25b).** MPI25b was obtained from methyl (S)-2-amino-3-cyclohexylpropanoate hydrochloride and N-((benzyloxy)carbonyl)-O-(tert-butyl)-L-allothreonine following a similar procedure to MPI11b. The crude product was purified by silica gel column chromatography (15–50% EtOAc in hexanes as the eluent) to afford the MPI25b (yield 84%). <sup>1</sup>H NMR (400 MHz, Chloroform-*d*) δ 7.65 (d, *J* = 7.7 Hz, 1H), 7.43 – 7.29 (m, 5H), 5.94 (d, *J* = 5.0 Hz, 1H), 5.27 – 4.90 (m, 2H), 4.52 (td, *J* = 8.4, 5.0 Hz, 1H), 4.27 – 4.16 (m, 2H), 3.72 (s, 3H), 1.79 – 1.61 (m, 7H), 1.60 – 1.47 (m, 1H), 1.30 (s, 9H), 1.22 – 1.14 (m, 3H), 1.11 (d, *J* = 6.0 Hz, 3H), 1.01 – 0.85 (m, 2H). <sup>13</sup>C NMR (100 MHz, CDCl<sub>3</sub>) δ 173.07, 169.43, 156.15, 136.28, 128.55, 128.15, 127.96, 75.57, 66.83, 60.42, 58.37, 52.16, 50.51, 39.76, 34.30, 33.51, 32.56, 28.20, 26.32, 26.18, 25.99, 21.07, 16.41.

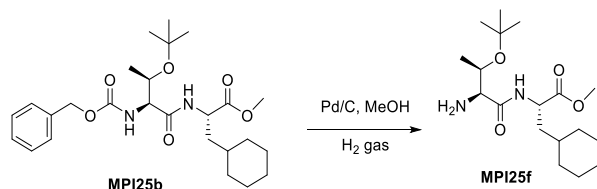

**(S)-methyl 2-((2S,3R)-2-amino-3-(tert-butoxy)butanamido)-3-cyclohexylpropanoate (MPI25f).** To a solution of MPI25b (2.73 mmol, 1.3 g) in methanol (20 mL) was added 10 % Pd/C (150 mg). The mixture was then stirred with hydrogen balloon at room temperature for 12 h. The catalyst was then filtered off and the solution was evaporated on vacuum to afford MPI25f as white solid, which was used without purification. <sup>1</sup>H NMR (400 MHz, Methanol-*d*<sub>4</sub>) δ 4.49 (dd, *J* = 9.4, 5.4

Hz, 1H), 4.01 – 3.90 (m, 1H), 3.73 (s, 3H), 3.41 – 3.28 (m, 1H), 3.20 (d,  $J = 4.5$  Hz, 1H), 1.90 – 1.59 (m, 7H), 1.51 – 1.37 (m, 1H), 1.23 (d,  $J = 9.9$  Hz, 15H), 1.11 – 0.89 (m, 2H).  $^{13}\text{C}$  NMR (100 MHz, MeOD):  $\delta$  174.31, 173.15, 73.93, 68.77, 59.84, 51.23, 50.10, 38.97, 33.92, 33.35, 32.03, 27.59, 26.10, 25.94, 25.70, 18.68.

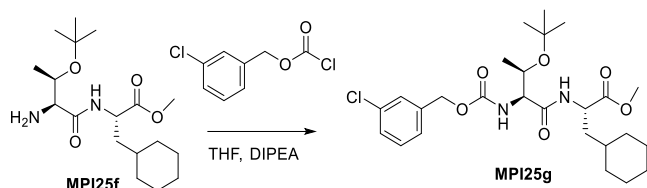

**(S)-methyl 2-((2S,3R)-3-(tert-butoxy)-2-(((3-chlorobenzyl)oxy)carbonyl)amino)butanamido)-3-cyclohexylpropanoate**

**(MPI25g).** To 3,5-dichlorobenzyl alcohol (0.201 g, 1.39 mmol) in THF (5 mL) were added  $\text{K}_2\text{CO}_3$  (193 mg, 1.39 mmol) and Triphosgene (166 mg, 0.56 mmol) and the mixture was stirred at room temperature for 1 h. The mixture was then poured into water (10 mL) and extracted with ethyl acetate (2×20 mL), combine organic layers and dried over  $\text{Na}_2\text{SO}_4$ . The organic phase was evaporated to dryness and the crude material was used directly in the next step. 3,5-Dichlorobenzyl Chloroformate in THF (5 mL) was added to drop wise to a mixture of compound **MPI25f** (400 mg, 1.39 mmol) and DIPEA (0.47 mL, 2.78 mmol). The reaction mixture stirred for 12 h. The mixture was then poured into water (30 mL) and extracted with ethyl acetate (4×20 mL). The organic layer was washed with aqueous hydrochloric acid 10% v/v (2×20 mL), saturated aqueous  $\text{NaHCO}_3$  (2×20 mL), brine (2×20 mL) and dried over  $\text{Na}_2\text{SO}_4$ . The organic phase was evaporated to dryness and the crude material purified by silica gel column chromatography (15-50% EtOAc in n-hexane as the eluent) to afford **MPI25g** white solid (410 mg, 70%).  $^1\text{H}$  NMR (400 MHz, Chloroform-*d*)  $\delta$  7.69 (d,  $J = 7.7$  Hz, 1H), 7.44 – 7.22 (m, 4H), 6.00 (d,  $J = 4.9$  Hz, 1H), 5.19 – 5.03 (m, 2H), 4.55 (td,  $J = 8.4, 5.1$  Hz, 1H), 4.22 (q,  $J = 6.9, 5.5$  Hz, 2H), 3.75 (s, 3H), 1.88 – 1.60 (m, 7H), 1.46 – 1.11 (m, 16H), 1.04 – 0.89 (m, 2H).  $^{13}\text{C}$  NMR (100 MHz,  $\text{CDCl}_3$ )  $\delta$  173.04, 171.18, 169.33, 155.86, 138.37, 134.42, 129.83, 128.24, 127.85, 125.81, 75.62, 66.84, 65.85, 60.42, 58.34, 52.17, 50.54, 39.75, 34.68, 34.31, 33.51, 32.56, 31.61, 28.19, 26.32, 26.18, 16.36.

**(S)-2-((2S,3R)-3-(tert-butoxy)-2-(((3-chlorobenzyl)oxy)carbonyl)amino)butanamido)-3-cyclohexylpropanoic acid** (**MPI25c**). **MPI25c** was prepared as a white solid following a similar procedure to **MPI11c** (yield 82%).  $^1\text{H}$  NMR (400 MHz, Chloroform-*d*)  $\delta$  7.57 (d,  $J = 7.3$  Hz, 1H), 7.39 – 7.04 (m, 4H), 6.09 (d,  $J = 5.8$  Hz, 1H), 5.16 – 4.83 (m, 2H), 4.36 (td,  $J = 8.1, 7.6, 4.7$  Hz, 1H), 4.20 – 4.01 (m, 2H), 1.72 – 1.46 (m, 7H), 1.33 – 0.95 (m, 16H), 0.95 – 0.76 (m, 2H).  $^{13}\text{C}$  NMR (100 MHz,  $\text{CDCl}_3$ ):  $\delta$  177.40, 170.06, 156.11, 138.37, 134.39, 129.82, 128.21, 127.85, 125.84, 75.56, 67.03, 65.96, 58.65, 39.41, 34.33, 33.65, 32.35, 28.20, 26.34, 26.20, 25.97, 16.82.

**(5S,8S,11S)-methyl 5-((R)-1-(tert-butoxy)ethyl)-1-(3-chlorophenyl)-8-(cyclohexylmethyl)-3,6,9-trioxo-11-(((S)-2-oxopyrrolidin-3-yl)methyl)-2-oxa-4,7,10-triazadodecan-12-oate** (**MPI25d**). **MPI25d** was prepared as a white solid following a similar procedure to **MPI11d** (yield 64%).  $^1\text{H}$  NMR (400 MHz, Chloroform-*d*)  $\delta$  7.48 (dd,  $J = 52.5, 7.6$  Hz, 2H), 7.36 – 7.01 (m, 4H), 6.30 (s, 1H), 5.90 (d,  $J = 5.1$  Hz, 1H), 5.01 (q,  $J = 12.6$  Hz, 2H), 4.54 – 4.33 (m, 2H), 4.11 (d,  $J = 5.7$  Hz, 2H), 3.65 (s, 3H), 3.39 – 3.18 (m, 2H), 2.46 – 2.25 (m, 2H), 2.20 – 2.03 (m, 1H), 1.87 – 1.40 (m, 9H), 1.11 (d,  $J = 72.3$  Hz, 16H), 0.97 – 0.79 (m, 2H).  $^{13}\text{C}$  NMR (100 MHz,

CDCl<sub>3</sub>)  $\delta$  179.92, 172.23, 172.12, 169.47, 155.95, 138.30, 134.42, 129.86, 128.28, 127.93, 125.93, 75.51, 66.73, 65.97, 58.82, 52.43, 51.49, 51.19, 40.55, 39.95, 38.64, 38.24, 34.10, 33.62, 33.13, 32.66, 28.30, 28.23, 26.39, 26.23, 26.07, 17.15.

**3-chlorobenzyl ((2S,3R)-3-(tert-butoxy)-1-(((S)-3-cyclohexyl-1-(((S)-1-hydroxy-3-((S)-2-oxopyrrolidin-3-yl)propan-2-yl)amino)-1-oxopropan-2-yl)amino)-1-oxobutan-2-yl)carbamate (MPI25e).** MPI25e was prepared as a white solid following a similar procedure to MPI11e (yield 67%). <sup>1</sup>H NMR (400 MHz, Chloroform-*d*)  $\delta$  7.54 (d, *J* = 7.6 Hz, 1H), 7.34 – 7.10 (m, 4H), 6.10 (d, *J* = 5.4 Hz, 1H), 5.89 (s, 1H), 5.01 (q, *J* = 12.6 Hz, 2H), 4.32 (q, *J* = 7.7 Hz, 1H), 4.18 – 4.03 (m, 2H), 3.94 (s, 1H), 3.55 (t, *J* = 4.0 Hz, 2H), 3.36 – 3.12 (m, 2H), 2.44 – 2.23 (m, 4H), 2.05 – 1.90 (m, 1H), 1.78 – 1.41 (m, 8H), 1.11 (d, *J* = 68.1 Hz, 15H), 0.93 – 0.77 (m, 2H). <sup>13</sup>C NMR (100 MHz, CDCl<sub>3</sub>)  $\delta$  180.95, 172.81, 169.73, 156.11, 138.27, 134.42, 129.88, 128.31, 127.97, 125.97, 75.52, 66.73, 66.06, 65.92, 59.13, 51.89, 40.52, 39.74, 38.21, 34.25, 33.62, 32.61, 28.63, 28.24, 26.36, 26.23, 26.03, 17.44.

**3-chlorobenzyl ((2S,3R)-3-(tert-butoxy)-1-(((S)-3-cyclohexyl-1-oxo-1-(((S)-1-oxo-3-((S)-2-oxopyrrolidin-3-yl)propan-2-yl)amino)propan-2-yl)amino)-1-oxobutan-2-yl)carbamate (MPI25).** MPI25 was prepared as a white solid following a similar procedure to MPI11 (yield 72%). <sup>1</sup>H NMR (400 MHz, Chloroform-*d*)  $\delta$  9.44 (s, 1H), 7.99 (d, *J* = 6.4 Hz, 1H), 7.41 (d, *J* = 7.8 Hz, 1H), 7.29 (s, 1H), 7.22 (d, *J* = 4.6 Hz, 2H), 7.16 (t, *J* = 4.5 Hz, 1H), 6.11 (s, 1H), 5.89 (d, *J* = 5.1 Hz, 1H), 5.01 (q, *J* = 12.7 Hz, 2H), 4.48 – 4.37 (m, 1H), 4.35 – 4.25 (m, 1H), 4.11 (d, *J* = 5.5 Hz, 2H), 3.36 – 3.19 (m, 2H), 2.44 – 2.26 (m, 2H), 1.98 – 1.86 (m, 2H), 1.78 – 1.70 (m, 2H), 1.60 – 1.47 (m, 3H), 1.30 – 1.15 (m, 12H), 1.16 – 1.08 (m, 3H), 1.02 (d, *J* = 6.0 Hz, 3H), 0.96 – 0.82 (m, 3H). <sup>13</sup>C NMR (100 MHz, CDCl<sub>3</sub>)  $\delta$  199.57, 179.96, 172.90, 169.62, 155.99, 138.26, 134.43, 129.88, 128.32, 127.95, 125.95, 75.51, 66.72, 66.02, 58.93, 57.58, 51.50, 40.54, 40.03, 37.92, 34.24, 33.65, 32.62, 29.81, 29.71, 28.62, 28.24, 26.35, 26.22, 26.02, 17.29.

**(S)-methyl 2-((2S,3R)-2-(((benzyloxy)carbonyl)amino)-3-(tert-butoxy)butanamido)-4-methylpentanoate (MPI26b).** MPI26b was obtained from methyl L-leucinate hydrochloride and N-((benzyloxy)carbonyl)-O-(tert-butyl)-L-allothreonine following a similar procedure to MPI11b. The crude product was purified by silica gel column chromatography (15-50% EtOAc in hexanes as the eluent) to afford the MPI26b (yield 78%). <sup>1</sup>H NMR (400 MHz, Chloroform-*d*)  $\delta$  7.66 (d, *J* = 7.8 Hz, 1H), 7.51 – 7.31 (m, 5H), 5.94 (d, *J* = 4.9 Hz, 1H), 5.26 – 4.95 (m, 2H), 4.57 – 4.42 (m, 1H), 4.28 – 4.16 (m, 2H), 3.72 (s, 3H), 1.75 – 1.52 (m, 3H), 1.30 (s, 9H), 1.11 (d, *J* = 6.2 Hz, 3H), 0.94 (dd, *J* = 6.1, 3.8 Hz, 6H). <sup>13</sup>C NMR (100 MHz, CDCl<sub>3</sub>):  $\delta$  172.95, 169.43, 156.11, 136.28, 128.54, 128.14, 127.95, 75.57, 66.89, 66.82, 60.40, 58.36, 52.15, 51.07, 41.27, 28.18, 25.01, 22.80, 21.95, 21.06, 16.39, 14.21.

**(S)-methyl 2-((2S,3R)-2-amino-3-(tert-butoxy)butanamido)-4-methylpentanoate (MPI26f).** MPI26f was prepared as a white solid following a similar procedure to MPI125f. <sup>1</sup>H NMR (400 MHz, Chloroform-*d*)  $\delta$  7.88 (d, *J* = 8.1 Hz, 1H), 4.61 – 4.43 (m, 1H), 4.19 – 4.06 (m, 1H), 3.72 (s, 3H), 3.21 (d, *J* = 3.2 Hz, 1H), 1.75 – 1.51 (m, 3H), 1.18 (s, 12H), 1.04 – 0.86 (m, 6H). <sup>13</sup>C NMR (100 MHz, CDCl<sub>3</sub>):  $\delta$  173.53, 173.48, 74.14, 67.85, 59.58, 52.11, 50.73, 41.23, 28.53, 24.90, 22.85, 21.91, 19.27.

**(S)-methyl 2-((2S,3R)-3-(tert-butoxy)-2-(((3-chlorobenzyl)oxy)carbonyl)amino)butanamido)-4-methylpentanoate (MPI26g).** MPI26g was prepared as a white solid following a similar procedure to MPI125g (yield

51%). <sup>1</sup>H NMR (400 MHz, Chloroform-*d*) δ 7.61 (d, *J* = 7.8 Hz, 1H), 7.36 – 7.09 (m, 4H), 5.91 (d, *J* = 5.0 Hz, 1H), 5.11 – 4.93 (m, 2H), 4.52 – 4.38 (m, 1H), 4.24 – 3.98 (m, 2H), 3.66 (s, 3H), 1.70 – 1.54 (m, 2H), 1.51 (q, *J* = 9.0, 8.4 Hz, 1H), 1.24 (s, 9H), 1.05 (d, *J* = 6.2 Hz, 3H), 0.87 (dd, *J* = 6.1, 3.6 Hz, 6H). <sup>13</sup>C NMR (100 MHz, CDCl<sub>3</sub>): δ 172.95, 169.36, 155.83, 138.36, 134.41, 129.83, 128.23, 127.85, 125.81, 75.64, 66.83, 65.84, 58.32, 52.19, 51.10, 41.24, 28.16, 25.02, 22.81, 21.95, 16.34.

**(S)-2-((2S,3R)-3-(tert-butoxy)-2-(((3-chlorobenzyl)oxy)carbonyl)amino)butanamido)-4-methylpentanoic acid (MPI126c).** MPI126c was prepared as a white solid following a similar procedure to MPI11c. <sup>1</sup>H NMR (400 MHz, Chloroform-*d*) δ 7.63 (d, *J* = 7.5 Hz, 1H), 7.37 – 7.09 (m, 4H), 5.97 (d, *J* = 5.4 Hz, 1H), 5.01 (q, *J* = 12.7 Hz, 2H), 4.44 (q, *J* = 7.2, 6.0 Hz, 1H), 4.25 – 4.07 (m, 2H), 1.72 – 1.59 (m, 2H), 1.59 – 1.43 (m, 1H), 1.22 (s, 9H), 1.02 (d, *J* = 6.3 Hz, 3H), 0.95 – 0.80 (m, 6H). <sup>13</sup>C NMR (100 MHz, CDCl<sub>3</sub>): δ 177.19, 169.79, 155.91, 138.31, 134.41, 129.83, 128.25, 127.86, 125.82, 75.70, 67.95, 66.91, 65.92, 58.35, 51.08, 40.96, 28.14, 25.03, 22.84, 21.84, 16.42.

**(5S,8S,11S)-methyl 5-((R)-1-(tert-butoxy)ethyl)-1-(3-chlorophenyl)-8-isobutyl-3,6,9-trioxo-11-(((S)-2-oxopyrrolidin-3-yl)methyl)-2-oxa-4,7,10-triazadodecan-12-oate (MPI126d).** MPI126d was prepared as a white solid following a similar procedure to MPI11d (yield 60%). <sup>1</sup>H NMR (400 MHz, Chloroform-*d*) δ 7.61 (d, *J* = 7.4 Hz, 1H), 7.42 (d, *J* = 7.9 Hz, 1H), 7.33 – 7.12 (m, 4H), 6.58 (s, 1H), 5.88 (d, *J* = 5.3 Hz, 1H), 5.01 (q, *J* = 12.6 Hz, 2H), 4.54 – 4.33 (m, 2H), 4.10 (d, *J* = 5.5 Hz, 2H), 3.65 (s, 3H), 3.36 – 3.18 (m, 2H), 2.52 – 2.25 (m, 2H), 2.17 – 2.05 (m, 1H), 1.87 – 1.71 (m, 2H), 1.67 – 1.59 (m, 2H), 1.49 (q, *J* = 8.9, 8.4 Hz, 1H), 1.20 (s, 9H), 1.00 (d, *J* = 6.0 Hz, 3H), 0.88 (dd, *J* = 11.7, 6.0 Hz, 6H). <sup>13</sup>C NMR (100 MHz, CDCl<sub>3</sub>): δ 179.96, 172.16, 172.07, 169.48, 155.92, 138.30, 134.41, 129.87, 128.29, 127.93, 125.94, 75.50, 66.73, 65.97, 58.83, 54.58, 52.43, 41.51, 40.82, 38.35, 33.08, 28.21, 24.78, 22.86, 22.12, 18.53, 17.18, 17.14.

**3-chlorobenzyl ((2S,3R)-3-(tert-butoxy)-1-(((S)-1-(((S)-1-hydroxy-3-((S)-2-oxopyrrolidin-3-yl)propan-2-yl)amino)-4-methyl-1-oxopentan-2-yl)amino)-1-oxobutan-2-yl)carbamate (MPI126e).** MPI126e was prepared as a white solid following a similar procedure to MPI11e (yield 73%). <sup>1</sup>H NMR (400 MHz, Chloroform-*d*) δ 7.66 (d, *J* = 7.9 Hz, 1H), 7.40 (d, *J* = 7.8 Hz, 1H), 7.33 – 7.10 (m, 4H), 6.28 – 6.06 (m, 2H), 5.08 – 4.88 (m, 2H), 4.34 (td, *J* = 8.2, 5.2 Hz, 1H), 4.14 – 4.06 (m, 1H), 4.02 – 3.80 (m, 1H), 3.74 (t, *J* = 6.4 Hz, 1H), 3.61 – 3.50 (m, 2H), 3.30 – 3.13 (m, 2H), 2.33 (dt, *J* = 8.6, 5.1 Hz, 2H), 2.15 – 1.96 (m, 1H), 1.82 – 1.68 (m, 1H), 1.64 – 1.32 (m, 4H), 1.20 (s, 9H), 1.00 (d, *J* = 6.3 Hz, 3H), 0.84 (dd, *J* = 9.0, 6.1 Hz, 6H). <sup>13</sup>C NMR (100 MHz, CDCl<sub>3</sub>): δ 181.06, 172.62, 169.58, 156.06, 138.34, 134.40, 129.86, 128.27, 127.94, 125.94, 75.52, 66.85, 65.97, 65.85, 58.98, 52.37, 50.31, 41.29, 40.55, 38.29, 32.66, 28.47, 28.21, 24.90, 22.77, 22.14, 17.21.

**3-chlorobenzyl ((2S,3R)-3-(tert-butoxy)-1-(((S)-4-methyl-1-oxo-1-(((S)-1-oxo-3-((S)-2-oxopyrrolidin-3-yl)propan-2-yl)amino)pentan-2-yl)amino)-1-oxobutan-2-yl)carbamate (MPI126).** MPI126 was prepared as a white solid following a similar procedure to MPI11 (yield 79%). <sup>1</sup>H NMR (400 MHz, Chloroform-*d*) δ 9.50 (s, 1H), 8.39 – 7.96 (m, 1H), 7.47 (d, *J* = 7.6 Hz, 1H), 7.35 (s, 1H), 7.29 (d, *J* = 4.7 Hz, 2H), 7.23 (s, 1H), 6.19 – 5.86 (m, 2H), 5.07 (q, *J* = 12.6 Hz, 2H), 4.55 – 4.34 (m, 2H), 4.18 (d, *J* = 5.3 Hz, 2H), 3.37 – 3.26 (m, 2H), 2.56 – 2.26 (m, 3H), 2.01 – 1.92 (m, 1H), 1.87 – 1.77 (m, 1H), 1.77 – 1.64 (m, 2H), 1.59 (t, *J* = 9.0 Hz, 1H), 1.27 (s, 9H), 1.08 (d, *J* = 5.9 Hz, 3H), 0.96 (dd, *J* = 10.9, 5.7 Hz, 6H). <sup>13</sup>C NMR (100 MHz, CDCl<sub>3</sub>) δ 199.64,

172.82, 169.54, 169.33, 155.98, 138.29, 134.42, 129.88, 128.31, 127.95, 125.96, 75.53, 66.74, 66.00, 58.91, 57.66, 52.11, 41.48, 40.61, 28.60, 28.22, 24.93, 22.92, 22.08, 17.21.

**(((3-chlorobenzyl)oxy)carbonyl)-L-valine (MPI27a).** MPI27a was prepared as a white solid following a similar procedure to MPI125g and followed by MPI111c protocol. <sup>1</sup>H NMR (400 MHz, DMSO-*d*<sub>6</sub>) δ 12.58 (s, 1H), 7.55 (d, *J* = 8.6 Hz, 1H), 7.47 – 7.25 (m, 4H), 5.18 – 4.98 (m, 2H), 3.87 (dd, *J* = 8.6, 5.8 Hz, 1H), 2.15 – 1.96 (m, 1H), 0.89 (t, *J* = 6.5 Hz, 6H).

**Methyl (S)-2-(((S)-2-(((3-chlorobenzyl)oxy)carbonyl)amino)-3-methylbutanamido)-3-cyclohexylpropanoate (MPI27b).** MPI27b was prepared as a white solid following a similar procedure to MPI11b (yield 56%). <sup>1</sup>H NMR (400 MHz, DMSO-*d*<sub>6</sub>) δ 8.25 (d, *J* = 7.5 Hz, 1H), 7.48 – 7.22 (m, 5H), 5.11 – 4.95 (m, 2H), 4.33 (q, *J* = 7.7, 7.2 Hz, 1H), 3.88 (t, *J* = 8.1 Hz, 1H), 3.60 (s, 3H), 2.01 – 1.89 (m, 1H), 1.72 – 1.44 (m, 7H), 1.34 (s, 1H), 1.22 – 1.00 (m, 3H), 0.98 – 0.69 (m, 8H).

**(S)-2-(((S)-2-(((3-chlorobenzyl)oxy)carbonyl)amino)-3-methylbutanamido)-3-cyclohexylpropanoic acid (MPI27c).** MPI27c was prepared as a white solid following a similar procedure to MPI11c (yield 83%).

**Methyl (5S,8S,11S)-1-(3-chlorophenyl)-8-(cyclohexylmethyl)-5-isopropyl-3,6,9-trioxo-11-(((S)-2-oxopyrrolidin-3-yl)methyl)-2-oxa-4,7,10-triazadodecan-12-oate (MPI27d).** MPI27d was prepared as a white solid following a similar procedure to MPI11d (yield 56%). <sup>1</sup>H NMR (400 MHz, Chloroform-*d*) δ 7.81 (d, *J* = 7.2 Hz, 1H), 7.35 (s, 1H), 7.32 – 7.18 (m, 3H), 6.60 (d, *J* = 8.4 Hz, 1H), 6.02 (s, 1H), 5.42 (d, *J* = 8.6 Hz, 1H), 5.15 – 5.00 (m, 2H), 4.58 (td, *J* = 8.8, 5.5 Hz, 1H), 4.49 (d, *J* = 6.6 Hz, 1H), 3.99 (dd, *J* = 8.6, 6.2 Hz, 1H), 3.72 (s, 3H), 3.41 – 3.24 (m, 2H), 2.48 – 2.35 (m, 2H), 2.23 – 2.05 (m, 2H), 2.01 – 1.58 (m, 8H), 1.56 – 1.46 (m, 1H), 1.40 – 1.04 (m, 5H), 1.04 – 0.77 (m, 8H).

**3-chlorobenzyl ((S)-1-(((S)-3-cyclohexyl-1-oxo-1-(((S)-1-oxo-3-(((S)-2-oxopyrrolidin-3-yl)propan-2-yl)amino)propan-2-yl)amino)-3-methyl-1-oxobutan-2-yl)carbamate (MPI27).** MPI27 was prepared as a white solid following a similar procedure of MPI11e followed by MPI11 procedure (yield 52%). <sup>1</sup>H NMR (400 MHz, Chloroform-*d*) δ 9.49 (s, 1H), 8.25 (d, *J* = 6.6 Hz, 1H), 7.39 – 7.11 (m, 4H), 7.02 (d, *J* = 8.3 Hz, 1H), 6.56 (s, 1H), 5.64 (d, *J* = 8.5 Hz, 1H), 5.06 (q, *J* = 12.6 Hz, 2H), 4.74 – 4.61 (m, 1H), 4.37 (s, 1H), 4.03 (t, *J* = 7.6 Hz, 1H), 3.41 – 3.22 (m, 2H), 2.50 – 2.27 (m, 2H), 2.19 – 2.07 (m, 1H), 2.07 – 1.86 (m, 3H), 1.86 – 1.48 (m, 8H), 1.39 – 1.04 (m, 5H), 1.04 – 0.81 (m, 8H). <sup>13</sup>C NMR (100 MHz, CDCl<sub>3</sub>) δ 199.5, 180.0, 173.3, 171.2, 156.4, 138.2, 134.4, 129.9, 128.3, 128.0, 126.0, 66.2, 60.6, 57.5, 51.1, 40.6, 40.2, 38.0, 34.2, 33.5, 32.5, 31.0, 29.9, 29.7, 28.4, 26.3, 26.2, 26.0, 19.2, 17.8.

**Methyl (S)-2-(((S)-2-(((S)-2-amino-3-methylbutanamido)-4-methylpentanamido)-3-(((S)-2-oxopyrrolidin-3-yl)propanoate (MPI28f).** MPI28f was prepared as a white solid following a similar procedure to MPI125f (yield 90%).

**Methyl (S)-2-(((S)-2-(((S)-2-(1H-indole-2-carboxamido)-3-methylbutanamido)-4-methylpentanamido)-3-(((S)-2-oxopyrrolidin-3-yl)propanoate (MPI28d).** MPI28d was prepared as a white solid following a similar procedure to MPI11d (yield 53%). <sup>1</sup>H NMR (400 MHz, Methanol-*d*<sub>4</sub>) δ 7.62 (d, *J* = 8.0 Hz, 1H), 7.49 – 7.39 (m, 1H), 7.22 (ddd, *J* = 8.2, 7.0, 1.2 Hz, 1H), 7.18 (d, *J* = 0.8 Hz, 1H), 7.11 – 7.01 (m, 1H), 4.53 (dd, *J* = 11.8, 3.9 Hz, 1H), 4.42 (dd, *J* = 13.8, 7.7 Hz, 2H), 3.72 (s, 3H), 2.56 (qd, *J* = 10.4, 4.0 Hz, 1H), 2.35 – 2.14 (m, 3H), 1.87 – 1.69 (m, 3H), 1.63 (t, *J* = 7.2 Hz,

2H), 1.04 (d,  $J = 6.7$  Hz, 6H), 0.94 (dd,  $J = 19.4, 6.5$  Hz, 6H).

**N-((S)-3-methyl-1-(((S)-4-methyl-1-oxo-1-(((S)-1-oxo-3-((S)-2-oxopyrrolidin-3-yl)propan-2-yl)amino)pentan-2-yl)amino)-1-oxobutan-2-yl)-1H-indole-2-carboxamide (MPI128).** MPI128 was prepared as a white solid following a similar procedure of MPI11e followed by MPI11 procedure (yield 60%).  $^1\text{H}$  NMR (400 MHz, DMSO- $d_6$ )  $\delta$  11.59 (d,  $J = 2.2$  Hz, 1H), 9.42 (s, 1H), 8.48 (d,  $J = 7.8$  Hz, 1H), 8.23 (dd,  $J = 19.8, 8.1$  Hz, 2H), 7.71 – 7.57 (m, 2H), 7.50 – 7.39 (m, 1H), 7.29 (d,  $J = 2.1$  Hz, 1H), 7.18 (ddd,  $J = 8.2, 6.9, 1.2$  Hz, 1H), 7.03 (ddd,  $J = 8.0, 6.9, 1.0$  Hz, 1H), 4.44 – 4.32 (m, 2H), 4.24 (ddd,  $J = 11.6, 7.8, 3.9$  Hz, 1H), 3.21 – 3.11 (m, 1H), 3.07 (td,  $J = 9.2, 7.0$  Hz, 1H), 2.31 (qd,  $J = 10.3, 3.9$  Hz, 1H), 2.13 (dt,  $J = 14.3, 7.9$  Hz, 2H), 1.96 – 1.85 (m, 1H), 1.73 – 1.58 (m, 3H), 1.58 – 1.43 (m, 2H), 1.02 – 0.79 (m, 12H).  $^{13}\text{C}$  NMR (100 MHz, DMSO- $d_6$ )  $\delta$  201.2, 178.8, 173.1, 171.5, 161.5, 137.0, 131.8, 127.5, 123.9, 122.0, 120.2, 112.7, 104.2, 58.8, 56.6, 51.6, 41.2, 37.6, 30.9, 29.8, 27.7, 24.7, 23.3, 22.3, 19.6, 19.2

**Table S1. Statistics of crystallographic analysis of M<sup>Pro</sup> in complexed with different inhibitors.**

| Protein/Ligand<br>(PDI entry)     | MPI11<br>(7RVM)        | MPI12<br>(7RVN)        | MPI13<br>(7RVO)        | MPI14<br>(7RVP)        |
|-----------------------------------|------------------------|------------------------|------------------------|------------------------|
| <b>Data Collection</b>            |                        |                        |                        |                        |
| Space group                       | C121                   | C121                   | P1                     | P1                     |
| cell dimensions                   |                        |                        |                        |                        |
| $a, b, c$ (Å)                     | 98.71, 81.35, 51.98    | 98.92, 81.18, 51.92    | 55.51, 60.54, 63.15    | 55.58, 60.80, 63.45    |
| $\alpha, \beta, \gamma$ (°)       | 90.00, 115.46, 90.00   | 90.00, 115.15, 90.00   | 79.98, 68.24, 70.25    | 80.06, 68.16, 70.12    |
| Resolution (Å)                    | 46.93-1.95 (2.00-1.95) | 47.00-1.63 (1.66-1.63) | 44.34-1.80 (1.84-1.80) | 58.81-1.90 (1.94-1.90) |
| $R_{\text{merge}}$                | 9.2 (72.0)             | 6.6 (77.6)             | 20.8 (57.9)            | 10.4 (145.9)           |
| $I/\sigma$                        | 9.3 (1.5)              | 12.5 (1.6)             | 3.5 (1.6)              | 5.9 (0.9)              |
| Completeness (%)                  | 97.4 (95.8)            | 95.8 (90.5)            | 89.8 (90.6)            | 95.5 (94.5)            |
| Redundancy                        | 6.9 (6.9)              | 5.9 (5.5)              | 3.7 (3.9)              | 3.6 (3.7)              |
| <b>Refinement</b>                 |                        |                        |                        |                        |
| Resolution (Å)                    | 46.93-1.95             | 47.00-1.63             | 44.34-1.80             | 43.48-1.90             |
| No. Reflections                   | 26267 (2594)           | 44233 (4238)           | 59690 (6029)           | 54436 (5351)           |
| $R_{\text{work}}/R_{\text{free}}$ | 0.2055/0.2383          | 0.1972/0.2124          | 0.2444/0.2750          | 0.2368/0.2736          |
| No. atoms                         |                        |                        |                        |                        |
| Protein                           | 2400                   | 2426                   | 4798                   | 4802                   |
| Water                             | 230                    | 183                    | 246                    | 173                    |
| $B$ factors                       |                        |                        |                        |                        |
| Protein                           | 23.652                 | 40.122                 | 31.900                 | 44.602                 |
| Water                             | 30.233                 | 43.562                 | 36.757                 | 44.891                 |
| R.m.s deviations                  |                        |                        |                        |                        |
| Bond lengths (Å)                  | 0.009                  | 0.009                  | 0.010                  | 0.010                  |
| Bond angles (°)                   | 1.67                   | 1.38                   | 2.38                   | 1.41                   |
| Protein/Ligand<br>(PDI entry)     | MPI16<br>(7RVQ)        | MPI18<br>(7RVR)        | MPI19<br>(7RVS)        | MPI20<br>(7RVT)        |
| <b>Data Collection</b>            |                        |                        |                        |                        |
| Space group                       | P1                     | P1                     | C121                   | P1                     |
| cell dimensions                   |                        |                        |                        |                        |
| $a, b, c$ (Å)                     | 56.34, 62.85, 63.57    | 54.70, 61.66, 62.10    | 98.80, 81.80, 52.03    | 55.51, 60.70, 63.34    |
| $\alpha, \beta, \gamma$ (°)       | 80.34, 68.56, 69.65    | 81.13, 69.31, 69.71    | 90.00, 115.5, 90.00    | 80.42, 68.42, 70.59    |
| Resolution (Å)                    | 24.91-2.47 (2.58-2.47) | 24.27-2.46 (2.56-2.46) | 24.41-1.85 (1.89-1.85) | 58.83-2.10 (2.16-2.10) |
| $R_{\text{merge}}$                | 41.3 (419.6)           | 21.7 (231.3)           | 6.9 (118.7)            | 30.0 (54.2)            |
| $I/\sigma$                        | 3.5 (0.3)              | 8.0 (0.5)              | 17.8 (1.6)             | 3.8 (2.6)              |
| Completeness (%)                  | 98.1 (84.8)            | 98.4 (86.8)            | 99.9 (100.0)           | 95.8 (96.3)            |
| Redundancy                        | 8.9 (5.1)              | 13.1 (7.8)             | 10.1 (7.5)             | 2.9 (3.1)              |
| <b>Refinement</b>                 |                        |                        |                        |                        |
| Resolution (Å)                    | 24.91-2.49             | 24.27-2.46             | 24.41-1.85             | 32.85 - 2.10           |
| No. Reflections                   | 13243 (1018)           | 12359 (758)            | 31512 (3128)           | 40069 (4014)           |
| $R_{\text{work}}/R_{\text{free}}$ | 0.2386/0.3222          | 0.2529/0.3231          | 0.2000/0.2265          | 0.2702/0.3076          |
| No. atoms                         |                        |                        |                        |                        |
| Protein                           | 2431                   | 2401                   | 2427                   | 2433                   |
| Water                             | 45                     | 37                     | 176                    | 144                    |
| $B$ factors                       |                        |                        |                        |                        |
| Protein                           | 50.449                 | 50.903                 | 37.652                 | 31.883                 |
| Water                             | 45.343                 | 46.359                 | 41.474                 | 34.449                 |
| R.m.s deviations                  |                        |                        |                        |                        |
| Bond lengths (Å)                  | 0.010                  | 0.010                  | 0.009                  | 0.009                  |
| Bond angles (°)                   | 1.25                   | 1.24                   | 1.31                   | 1.13                   |



Table S1 – continued

| Protein/Ligand<br>(PDI entry)     | MPI21<br>(7RVU)        | MPI22<br>(7RVV)        | MPI23<br>(7RVW)        | MPI24<br>(7RVX)        |
|-----------------------------------|------------------------|------------------------|------------------------|------------------------|
| <b>Data Collection</b>            |                        |                        |                        |                        |
| Space group                       | P1                     | P1                     | C1                     | P1                     |
| cell dimensions                   |                        |                        |                        |                        |
| $a, b, c$ (Å)                     | 55.60, 60.93, 62.87    | 46.46, 52.26, 64.12    | 95.91, 81.31, 54.47    | 56.06, 61.15, 63.76    |
| $\alpha, \beta, \gamma$ (°)       | 79.27, 68.84, 69.73    | 108.82, 97.3, 98.14    | 90.00, 116.98, 90.00   | 79.94, 68.33, 70.17    |
| Resolution (Å)                    | 57.76-2.50 (2.60-2.50) | 48.52-3.00 (3.18-3.00) | 24.27-1.85 (1.89-1.85) | 49.69-1.85 (1.89-1.85) |
| $R_{\text{merge}}$                | 47.1 (91.8)            | 10.5 (170.0)           | 13.6 (98.3)            | 8.3 (51.4)             |
| $I/\sigma$                        | 2.1 (0.8)              | 6.1 (4.0)              | 13.3 (2.1)             | 7.6 (1.5)              |
| Completeness (%)                  | 98.9 (98.7)            | 93.2 (95.9)            | 99.9 (100.0)           | 89.1 (85.9)            |
| Redundancy                        | 5.4 (5.6)              | 2.8 (2.9)              | 11.4 (9.1)             | 3.8 (3.8)              |
| <b>Refinement</b>                 |                        |                        |                        |                        |
| Resolution (Å)                    | 43.51-2.50             | 48.52-3.00             | 24.27-1.85             | 49.69-1.85             |
| No. Reflections                   | 12573 (1249)           | 10372 (1108)           | 31811 (3152)           | 56153 (5444)           |
| $R_{\text{work}}/R_{\text{free}}$ | 0.2515/0.3285          | 0.3414/0.4279          | 0.1898/0.2175          | 0.2353/0.2651          |
| No. atoms                         |                        |                        |                        |                        |
| Protein                           | 2378                   | 2376                   | 2401                   | 4840                   |
| Water                             | 43                     | 0                      | 223                    | 229                    |
| $B$ factors                       |                        |                        |                        |                        |
| Protein                           | 29.165                 | 22.608                 | 30.173                 | 40.269                 |
| Water                             | 26.273                 | 0                      | 34.473                 | 42.174                 |
| R.m.s deviations                  |                        |                        |                        |                        |
| Bond lengths (Å)                  | 0.010                  | 0.010                  | 0.009                  | 0.012                  |
| Bond angles (°)                   | 1.28                   | 1.38                   | 1.24                   | 1.50                   |
| Protein/Ligand<br>(PDI entry)     | MPI25<br>(7RVY)        | MPI26<br>(7RVZ)        | MPI27<br>(7RV0)        | MPI28<br>(7RV1)        |
| <b>Data Collection</b>            |                        |                        |                        |                        |
| Space group                       | C1                     | C121                   | C1                     | P1                     |
| cell dimensions                   |                        |                        |                        |                        |
| $a, b, c$ (Å)                     | 96.50, 81.24, 54.48    | 98.33, 80.95, 51.82    | 95.66, 80.81, 54.44    | 55.64, 61.09, 63.87    |
| $\alpha, \beta, \gamma$ (°)       | 90.00, 117.06, 90.00   | 90.00, 115.19, 90.00   | 90.00, 116.96, 90.00   | 79.27, 68.06, 69.37    |
| Resolution (Å)                    | 24.21-1.85 (1.89-1.85) | 59.88-1.90 (1.94-1.90) | 24.26-1.85 (1.89-1.85) | 59.13-2.50 (2.60-2.50) |
| $R_{\text{merge}}$                | 6.5 (38.7)             | 10.1 (141.9)           | 12.2 (90.8)            | 26.2 (37.8)            |
| $I/\sigma$                        | 12.2 (2.5)             | 8.7 (1.3)              | 8.8 (1.7)              | 4.7 (2.8)              |
| Completeness (%)                  | 92.6 (81.3)            | 96.1 (95.6)            | 99.8 (98.9)            | 97.1 (97.4)            |
| Redundancy                        | 4.2 (3.7)              | 6.4 (6.5)              | 6.8 (4.0)              | 2.9 (3.1)              |
| <b>Refinement</b>                 |                        |                        |                        |                        |
| Resolution (Å)                    | 24.21-1.85             | 43.45-1.90             | 24.26-1.85             | 46.10 - 2.50           |
| No. Reflections                   | 29597 (2613)           | 27763 (2745)           | 31429 (3102)           | 24135 (2442)           |
| $R_{\text{work}}/R_{\text{free}}$ | 0.2309/0.2680          | 0.1911/0.2199          | 0.2220/0.2534          | 0.2566/0.3160          |
| No. atoms                         |                        |                        |                        |                        |
| Protein                           | 2407                   | 2358                   | 2403                   | 4722                   |
| Water                             | 232                    | 103                    | 200                    | 122                    |
| $B$ factors                       |                        |                        |                        |                        |
| Protein                           | 22.457                 | 44.839                 | 28.397                 | 16.575                 |
| Water                             | 25.228                 | 44.799                 | 31.384                 | 15.514                 |
| R.m.s deviations                  |                        |                        |                        |                        |
| Bond lengths (Å)                  | 0.009                  | 0.008                  | 0.011                  | 0.010                  |
| Bond angles (°)                   | 1.19                   | 1.73                   | 1.39                   | 1.24                   |

## Supplementary Figure 1

M<sup>Pro</sup> was incubated with different concentrations of MPI11 for 15, 30 and 60 min and then its activity was determined by adding Sub3.

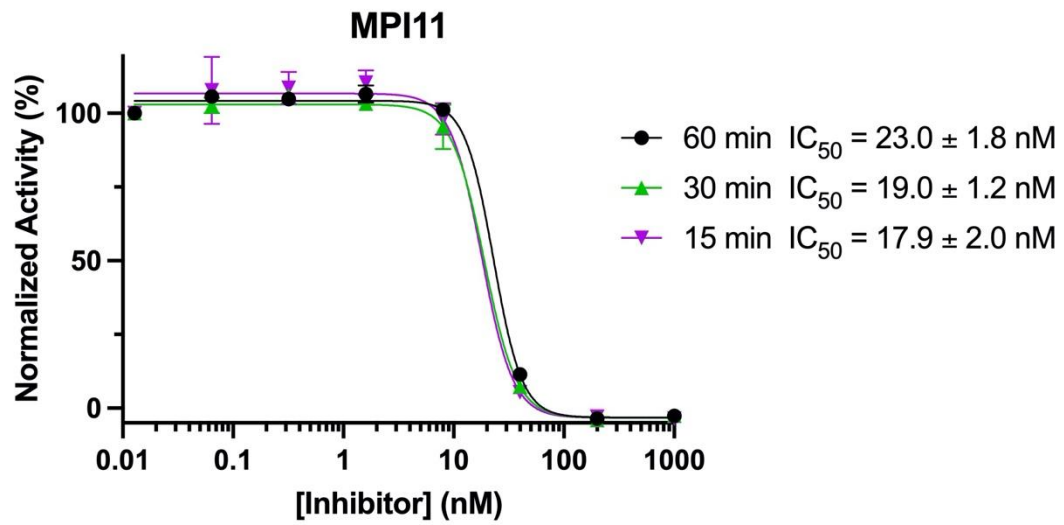

## Supplementary Figure S2

To assess the half-maximal cytotoxic concentration ( $CC_{50}$ ), stock solutions of the tested compounds were dissolved in DMSO and diluted further to the working solutions with DMEM. Briefly, the 293T cells were seeded in 96 well-plates and incubated at 37 °C and 5%  $CO_2$  for 24 h. After that, the cells were treated with different concentrations (200  $\mu$ M, 100  $\mu$ M, 50  $\mu$ M, 25  $\mu$ M, 12.5  $\mu$ M, 6.25  $\mu$ M, 3.125  $\mu$ M, 1.5625  $\mu$ M, 0.78125  $\mu$ M, 0  $\mu$ M) of the tested compounds in triplicates for 48 h. Cell viability was assessed by MTT assay to determine the  $CC_{50}$ . All data reported was normalized on a per-plate basis to wells that contained cells in the presence of 200  $\mu$ M doxorubicin (0% cell viability). The concentration caused a 50% cytotoxicity ( $CC_{50}$ ) was obtained by plotting the normalization % cell viability versus log<sub>10</sub> sample concentration.

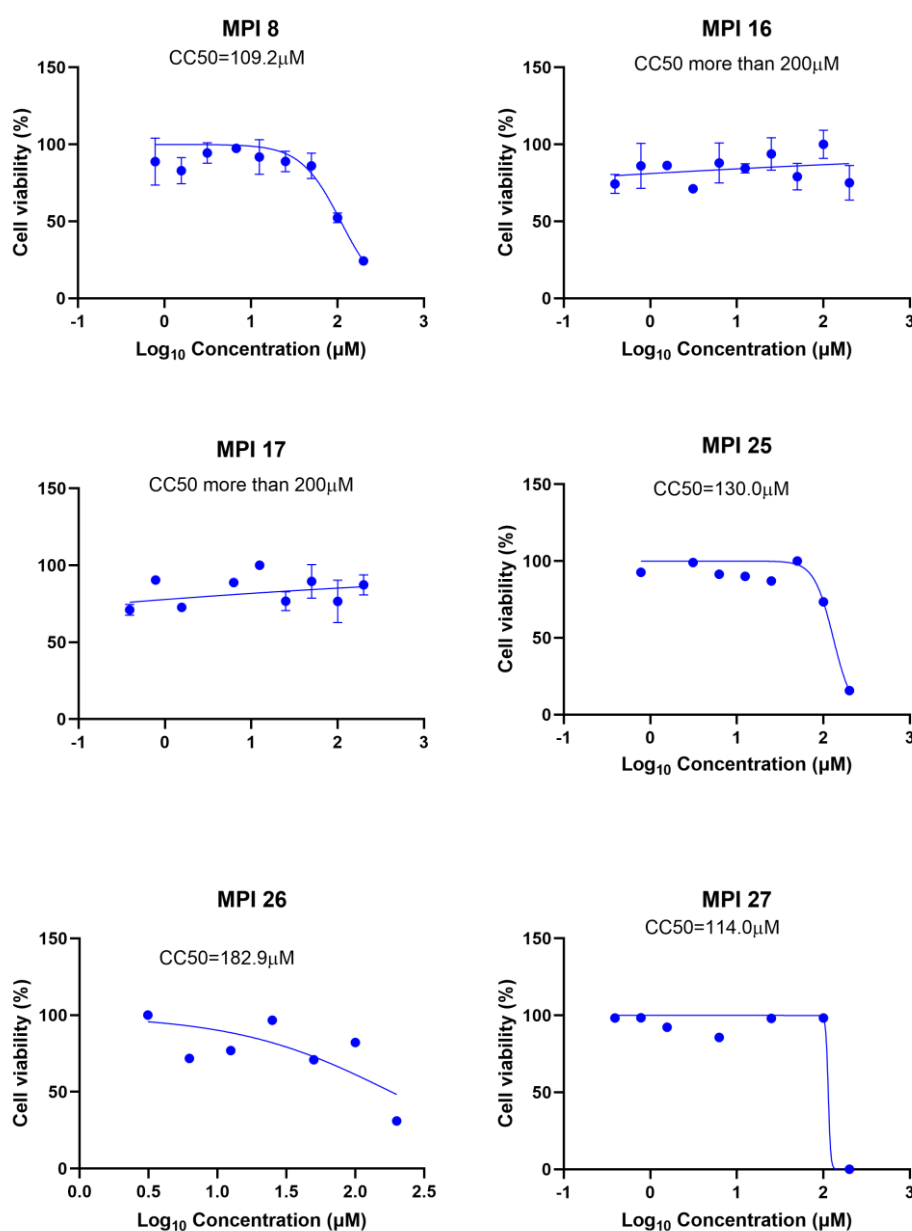

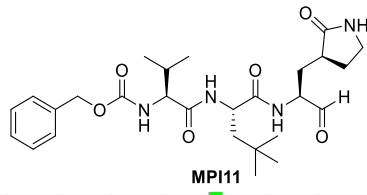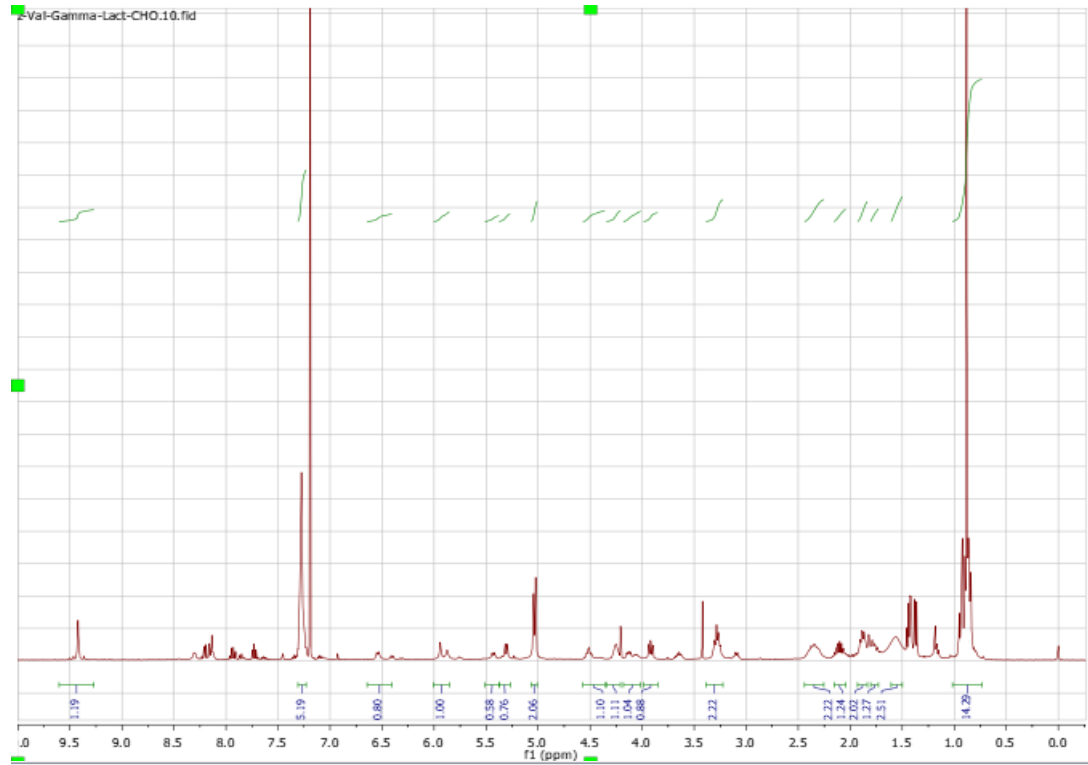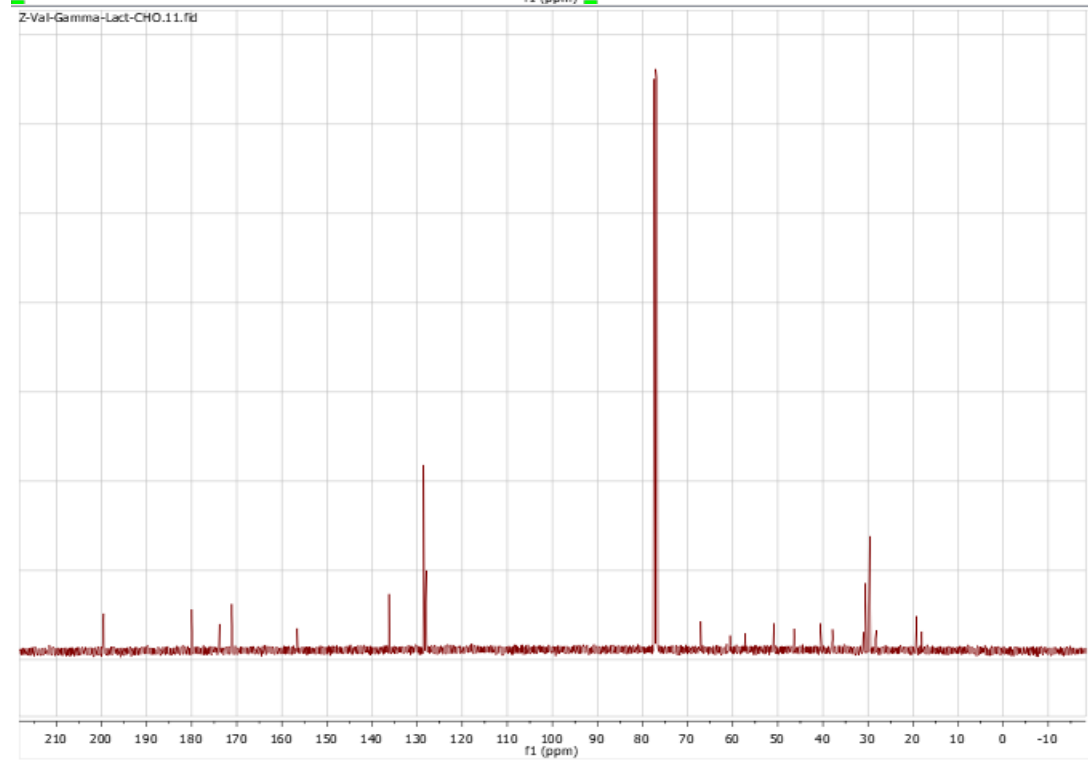



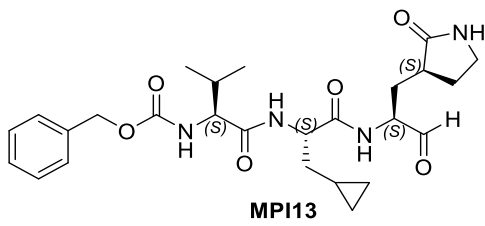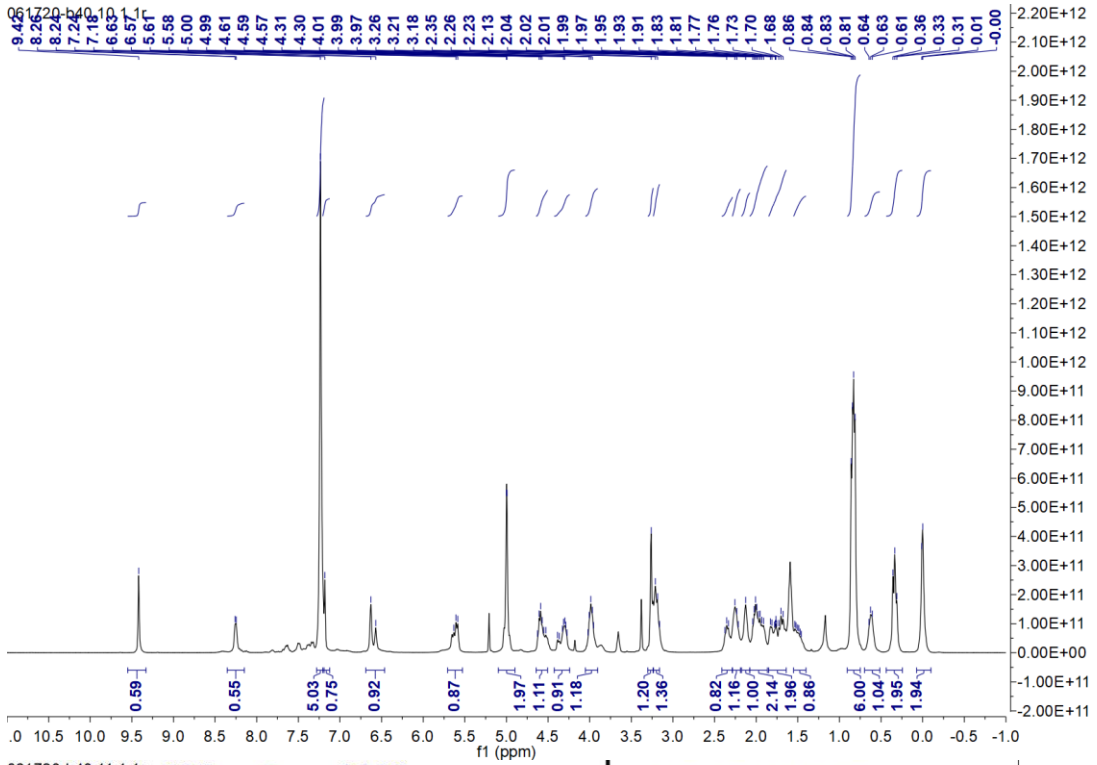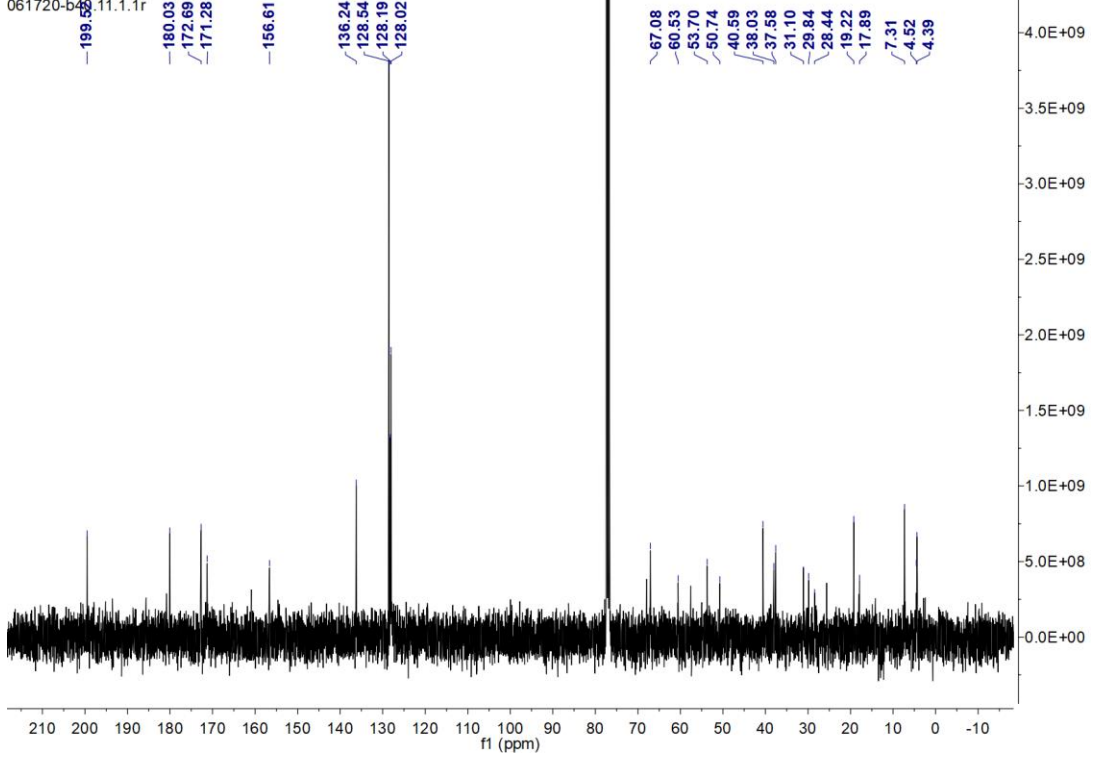

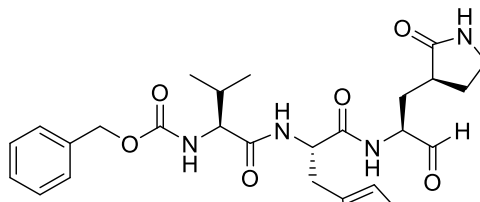

MPI14

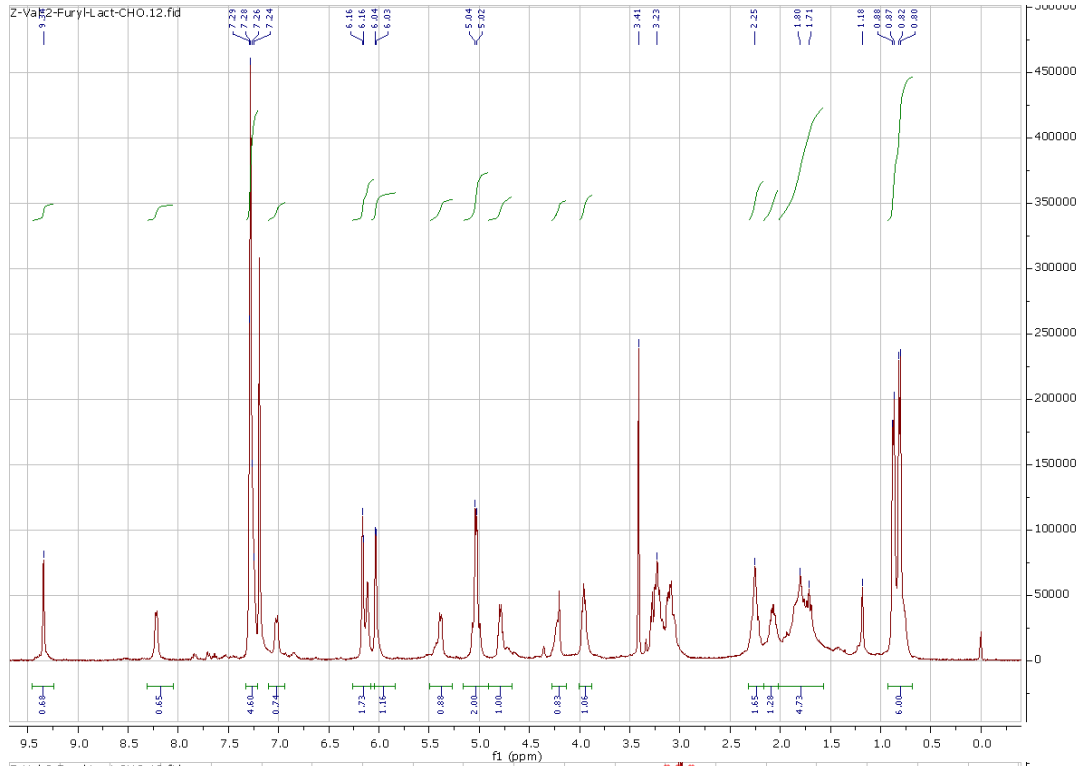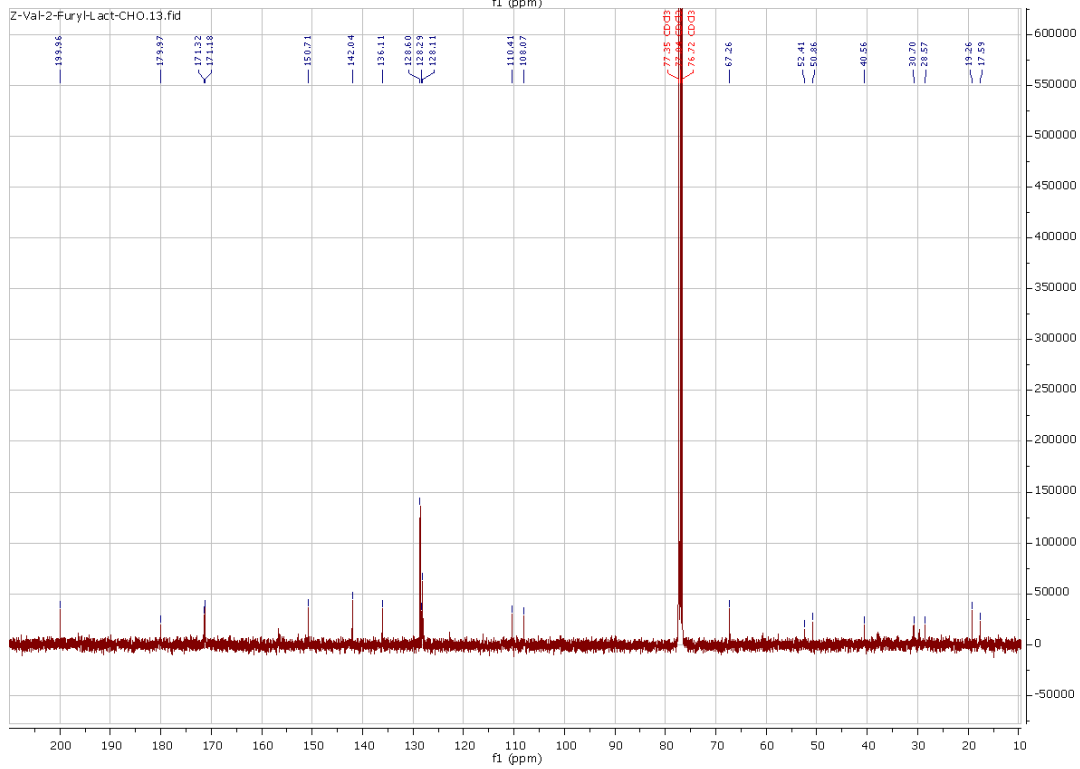

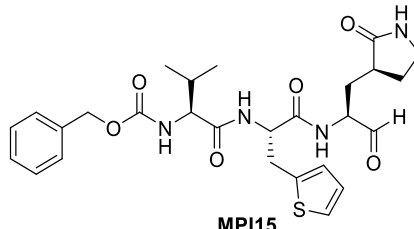

MPI15

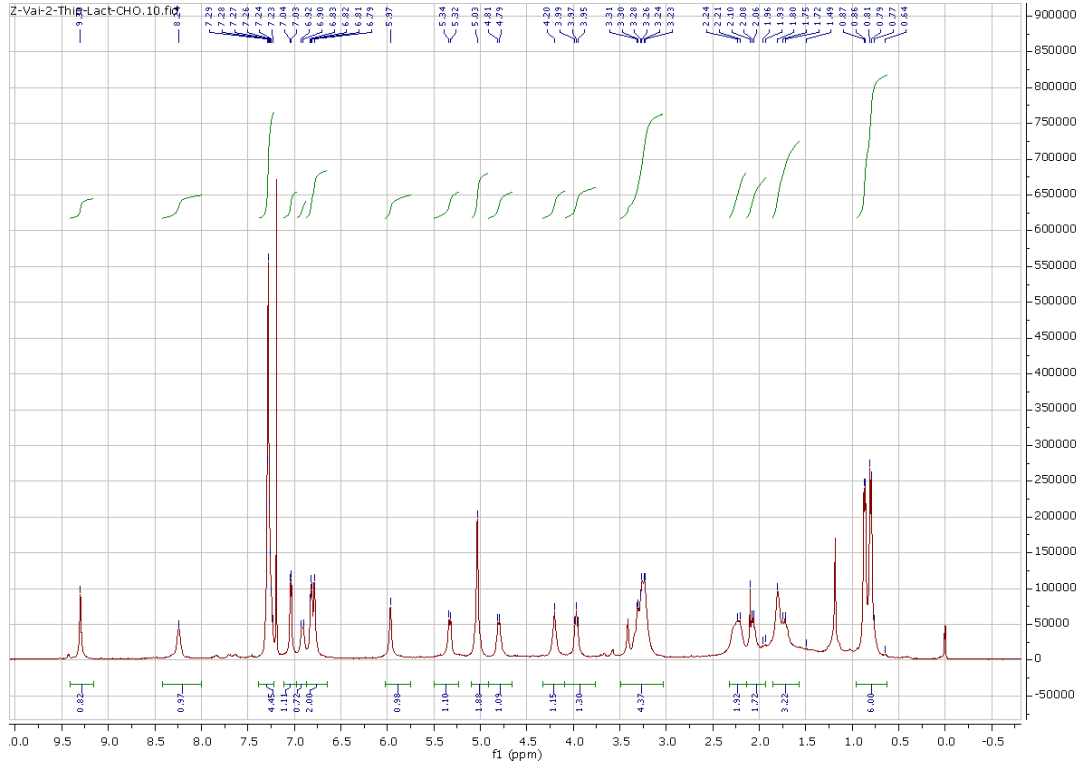



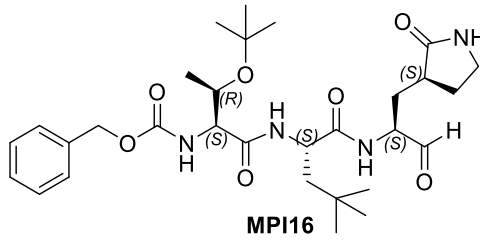

MPI16

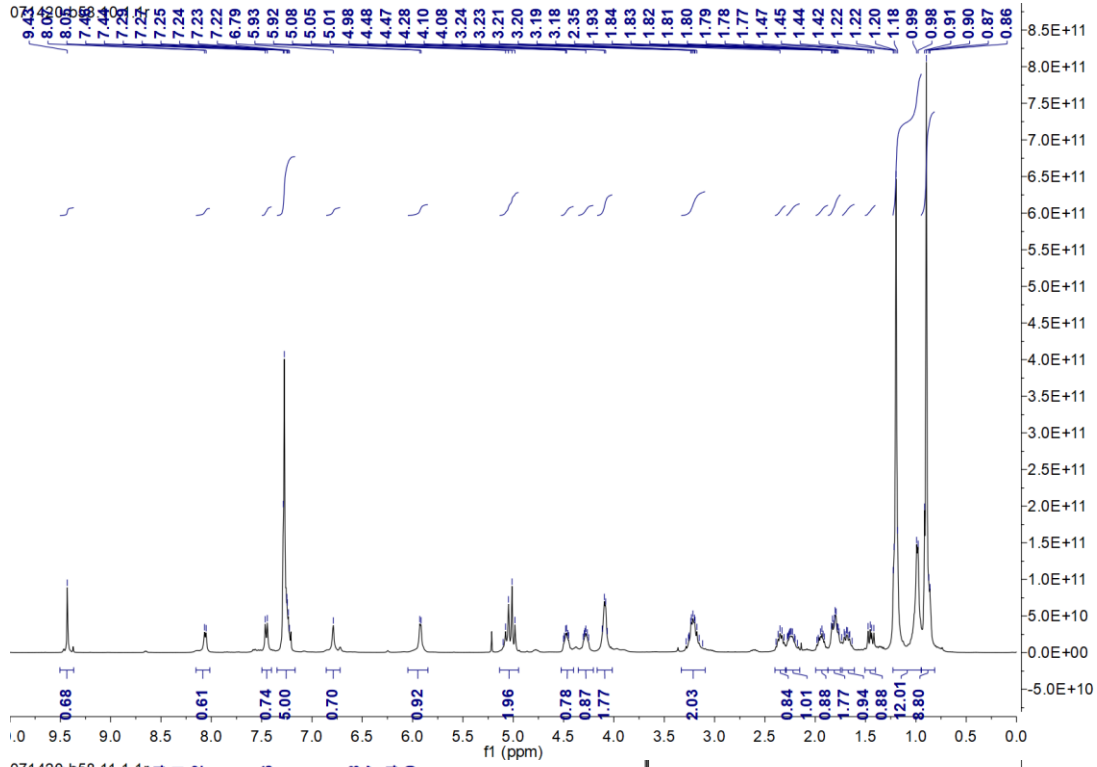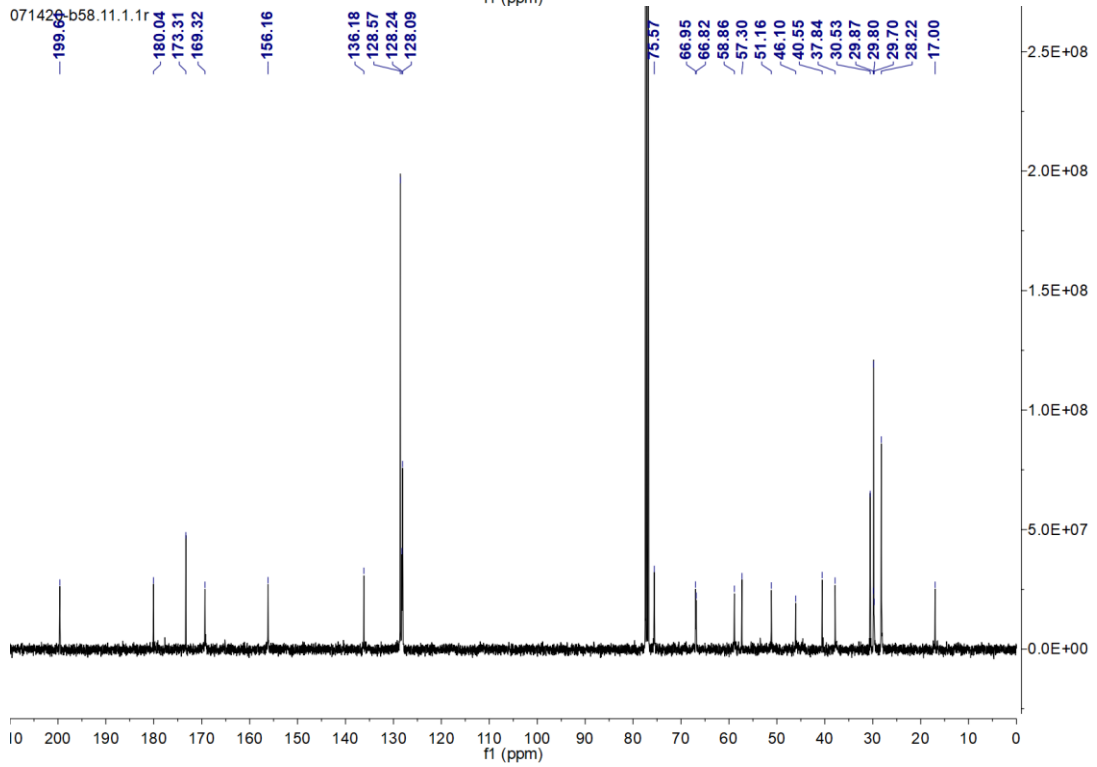

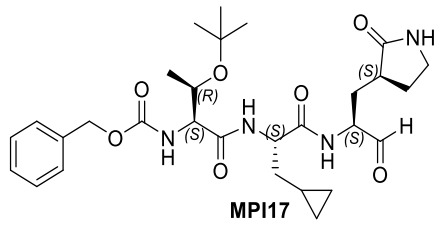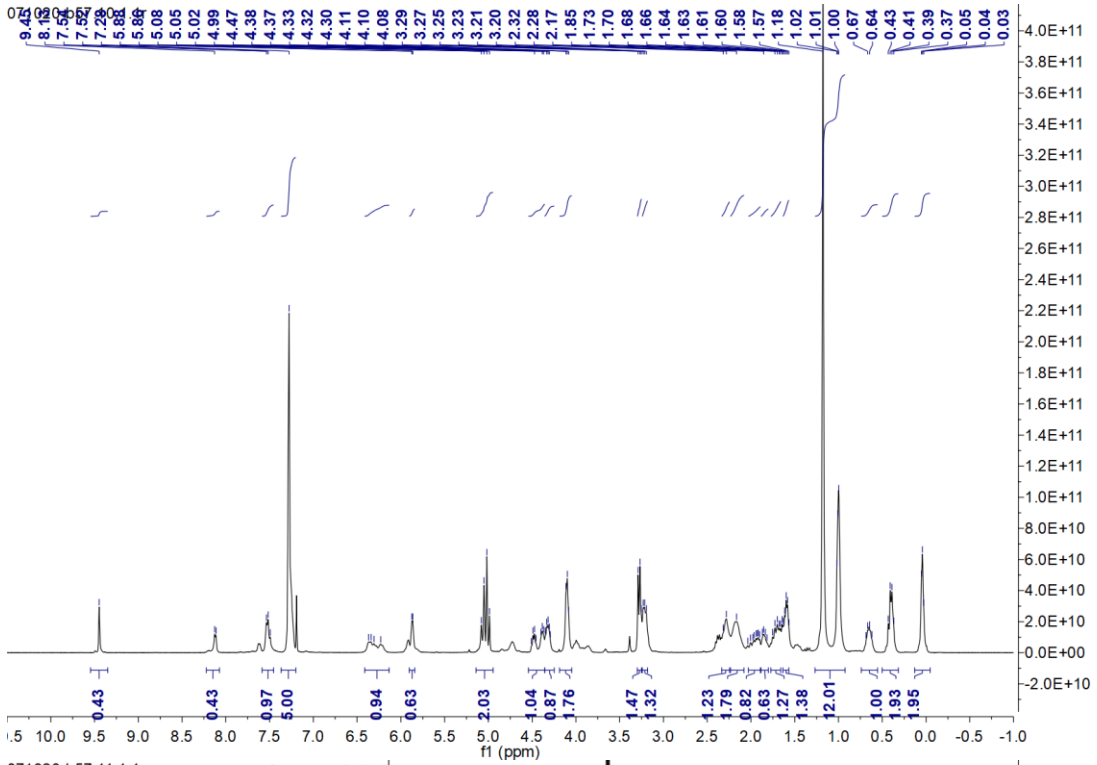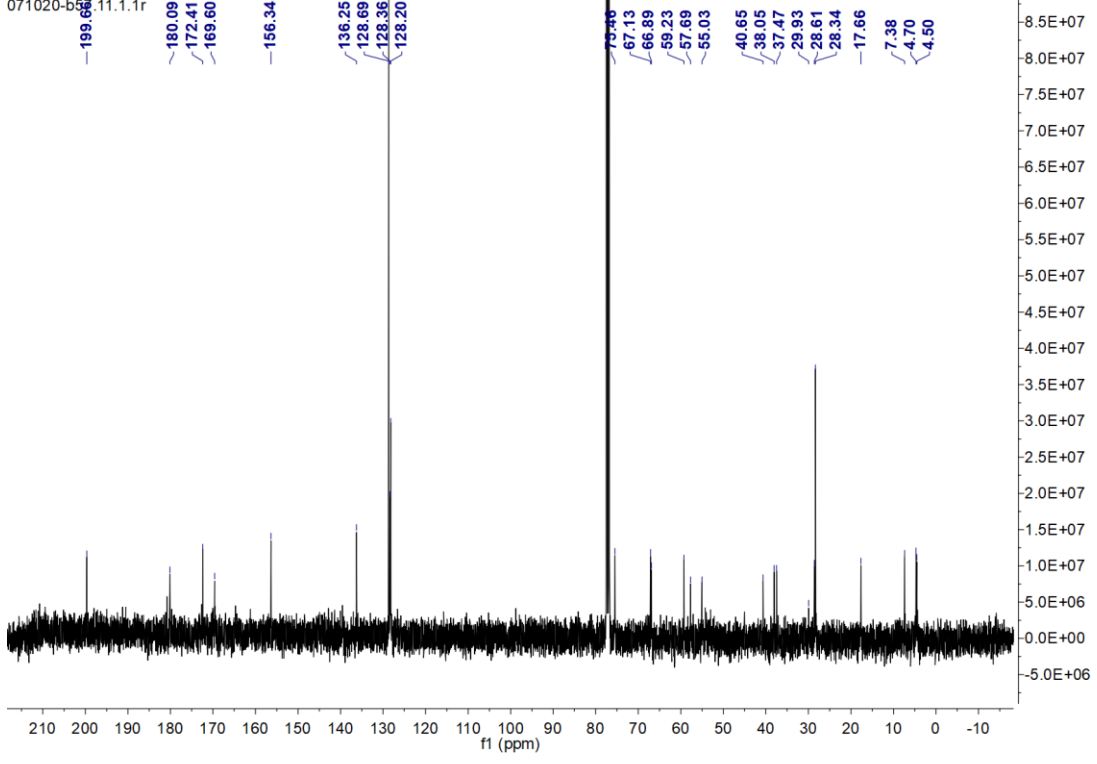

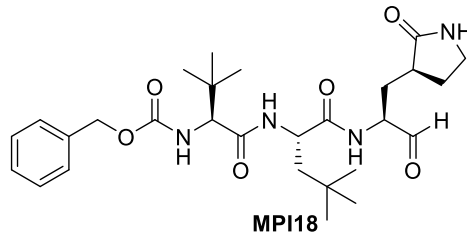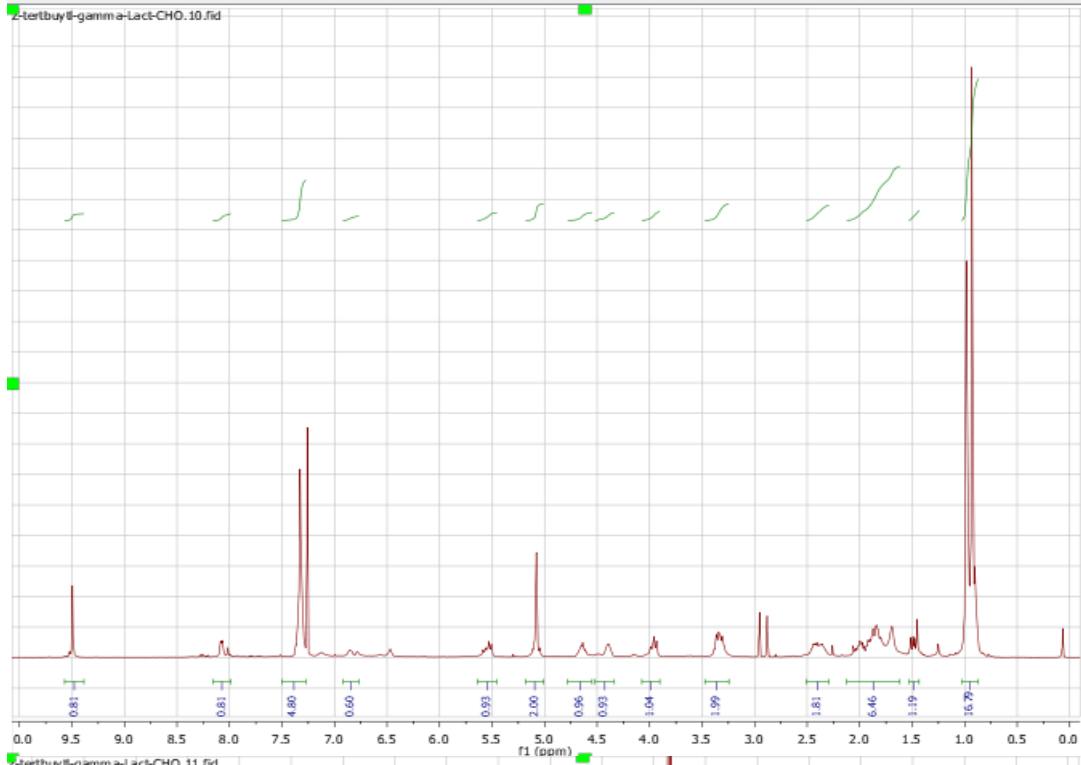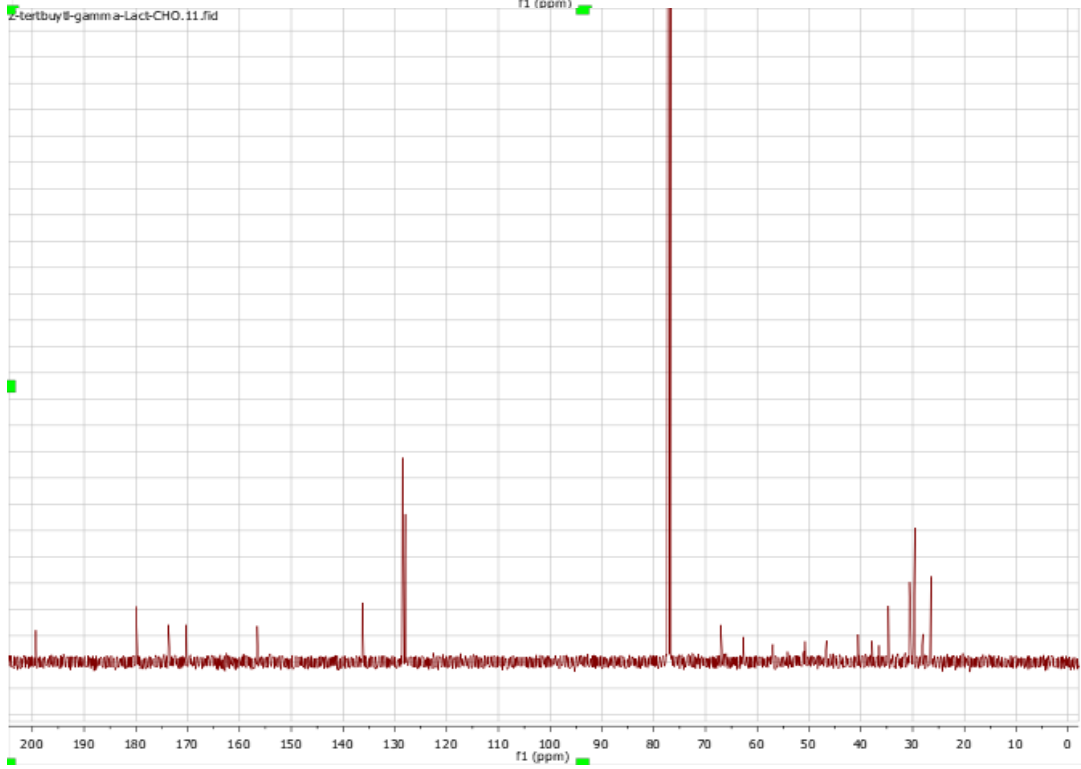

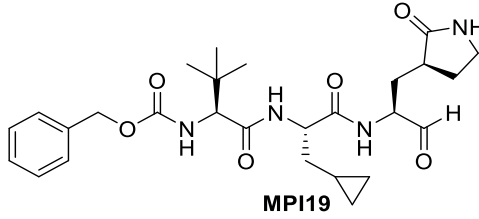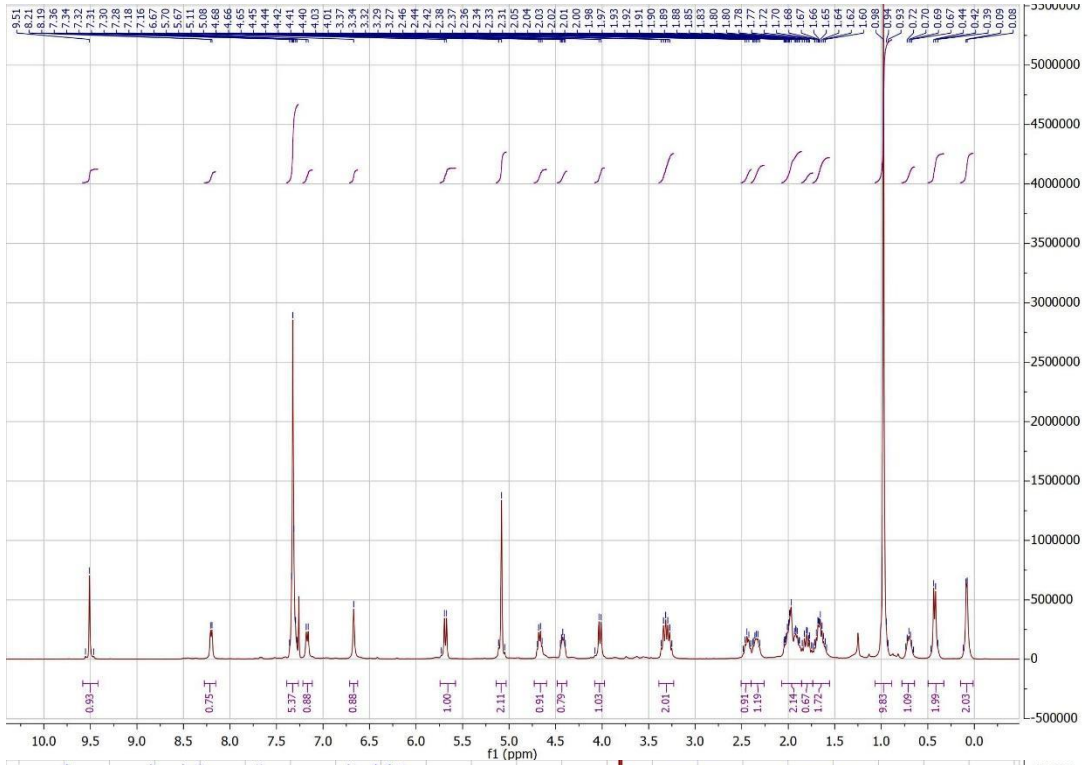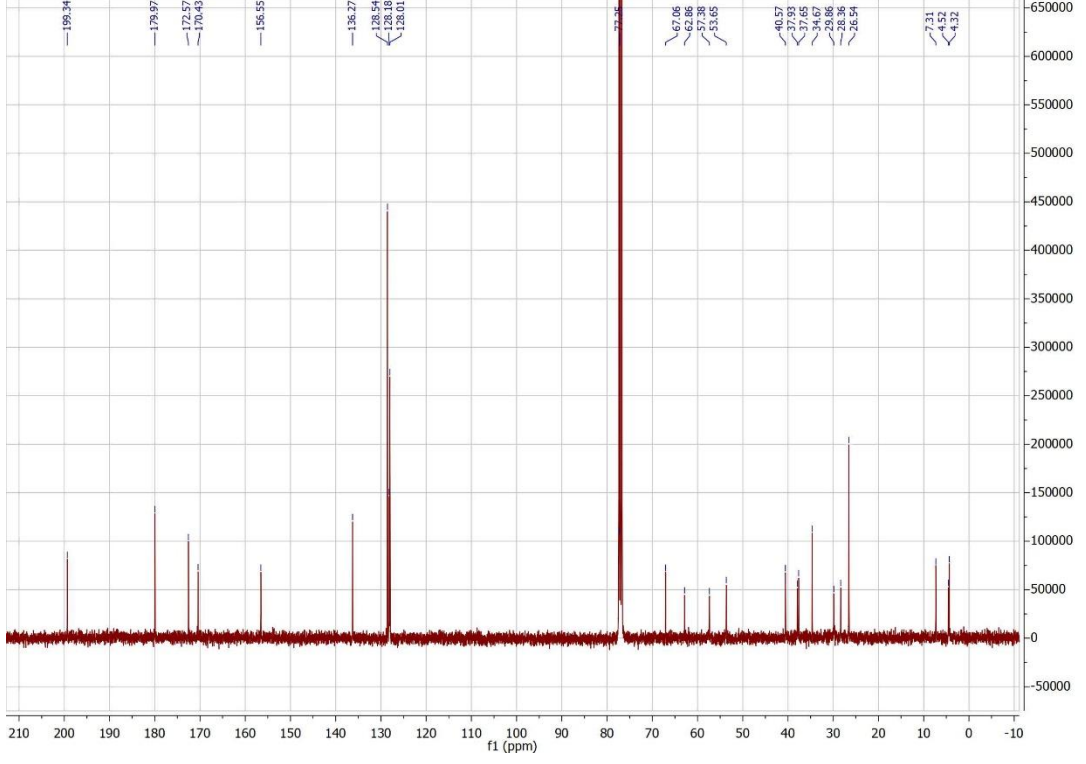

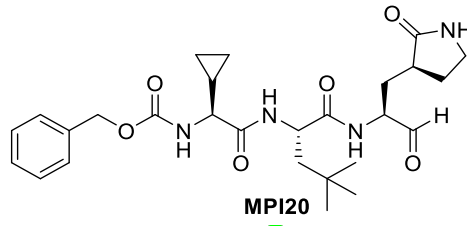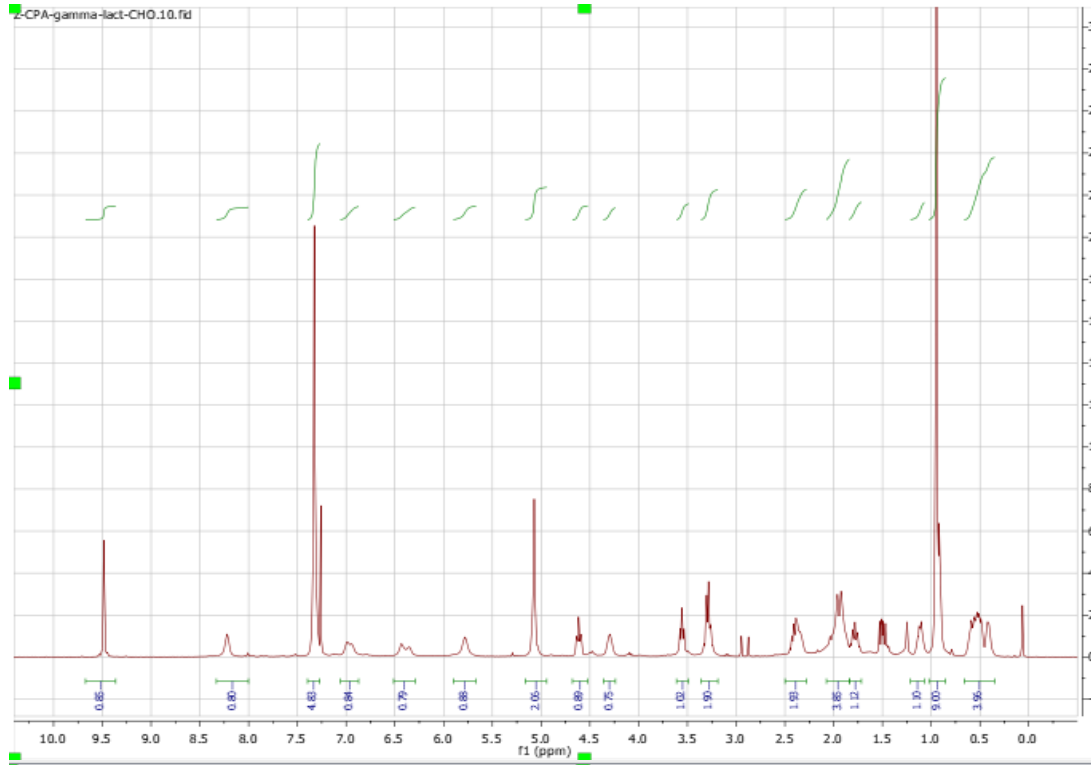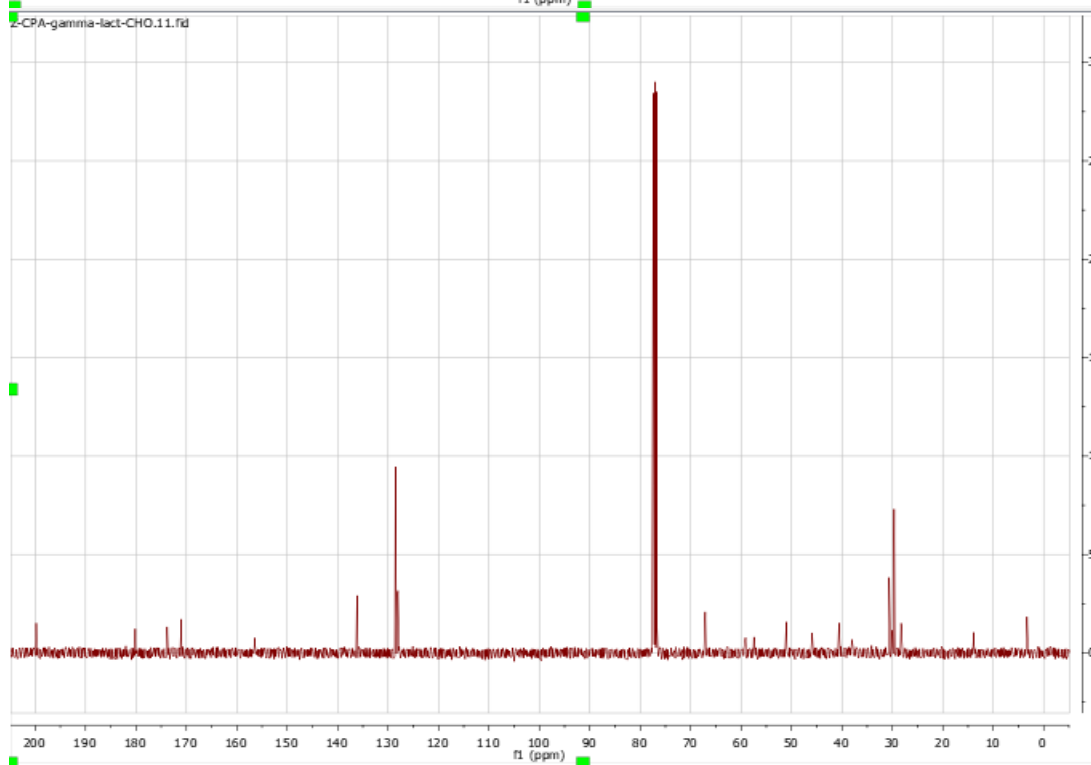

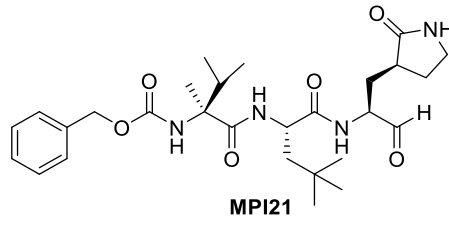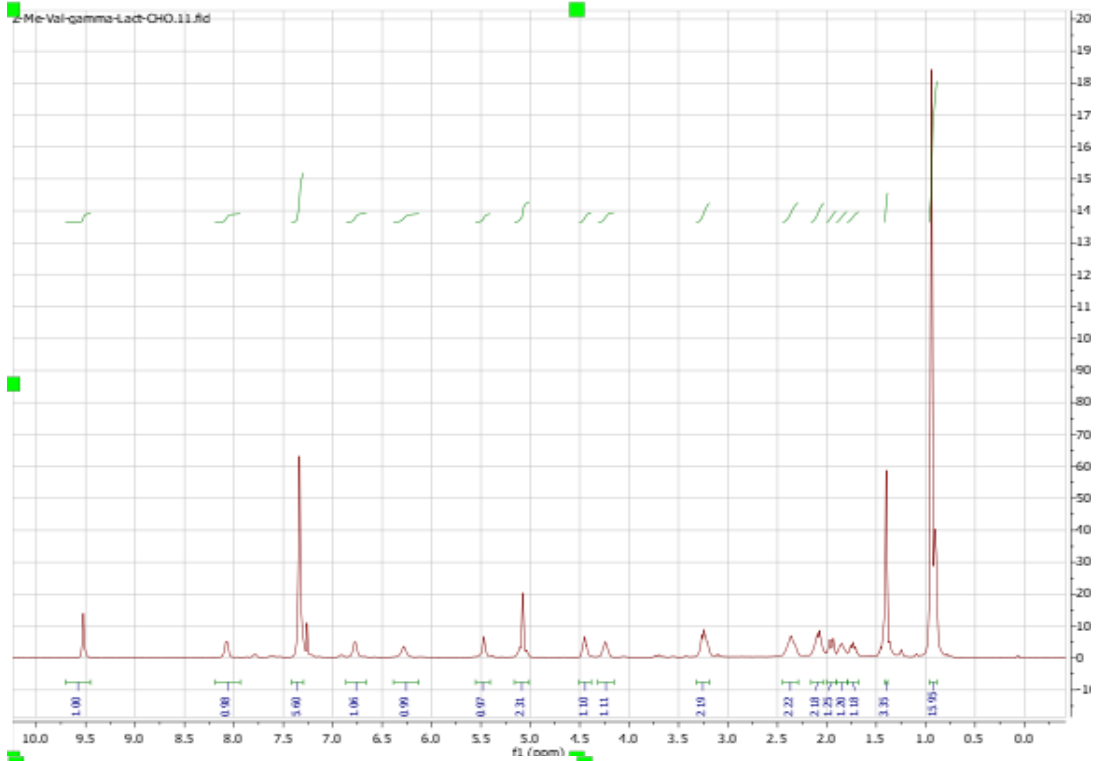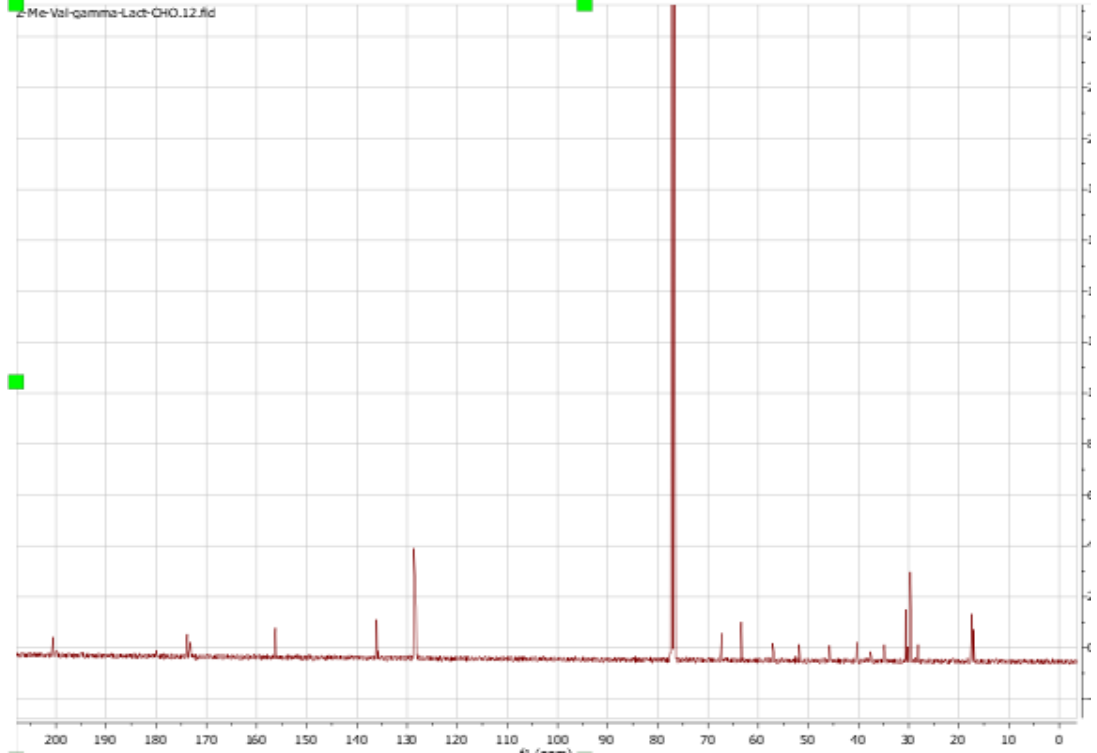

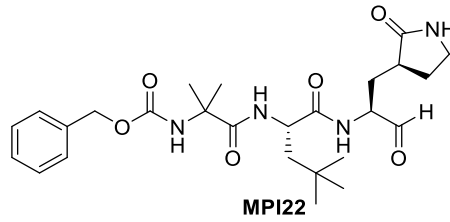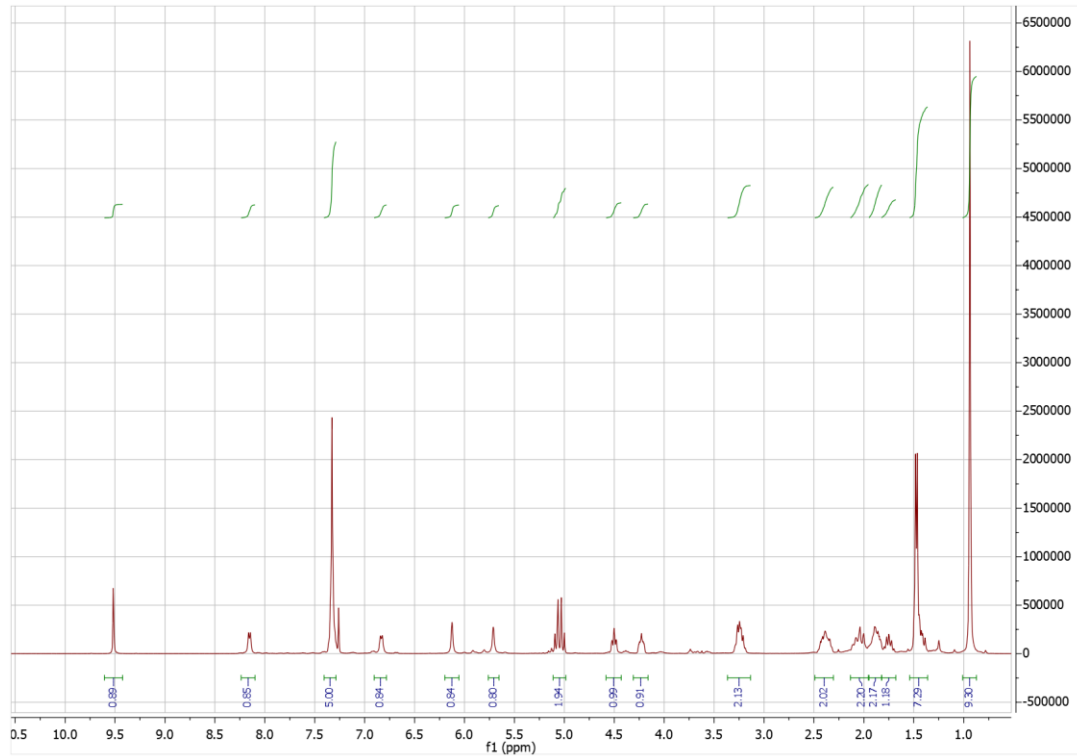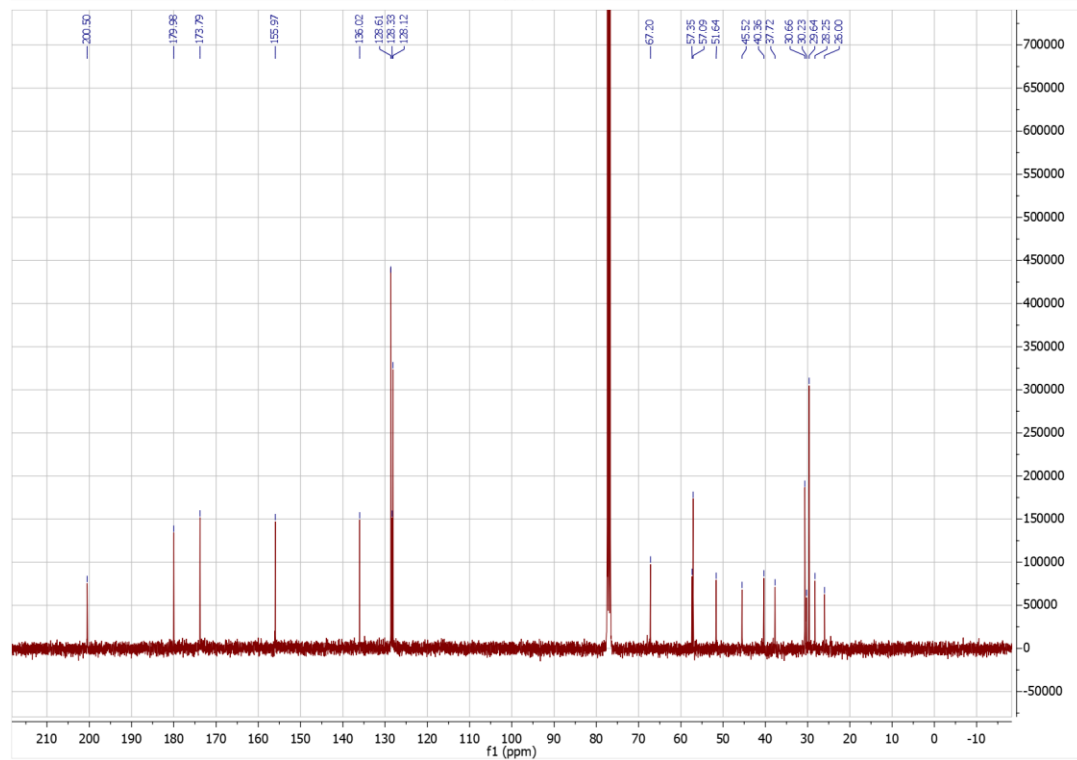

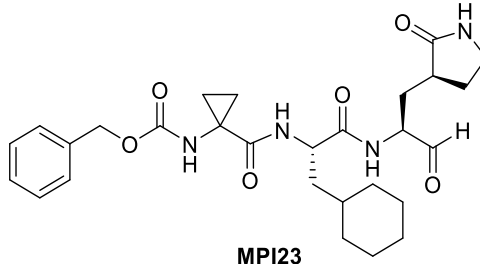

MPI23

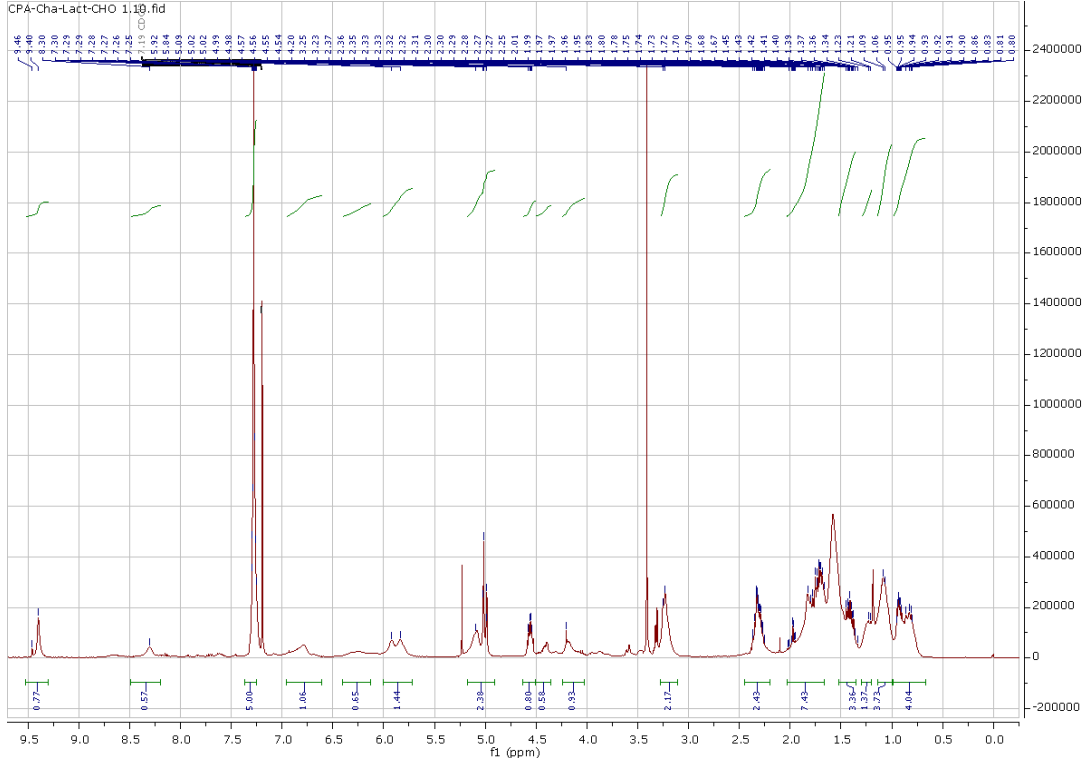



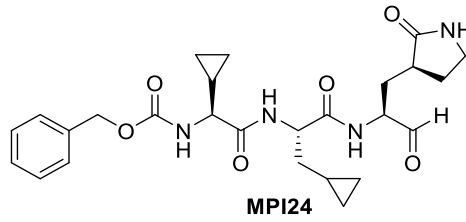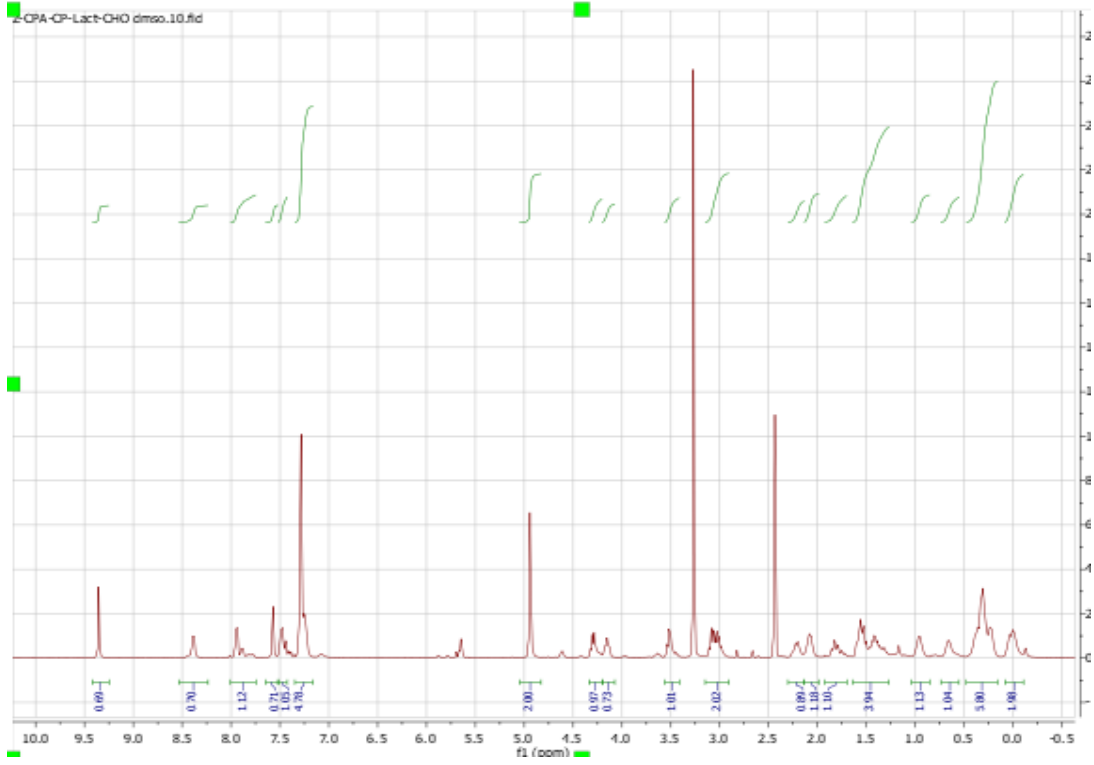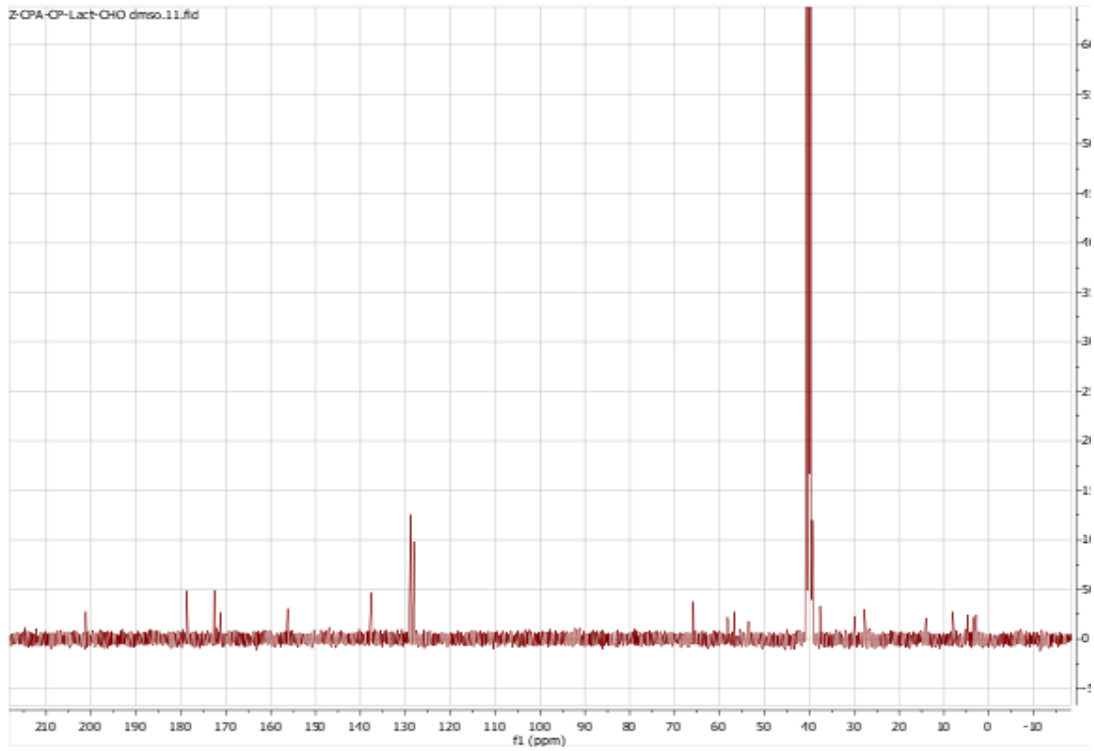

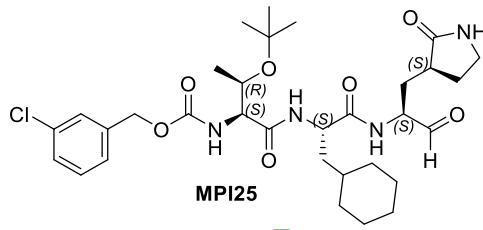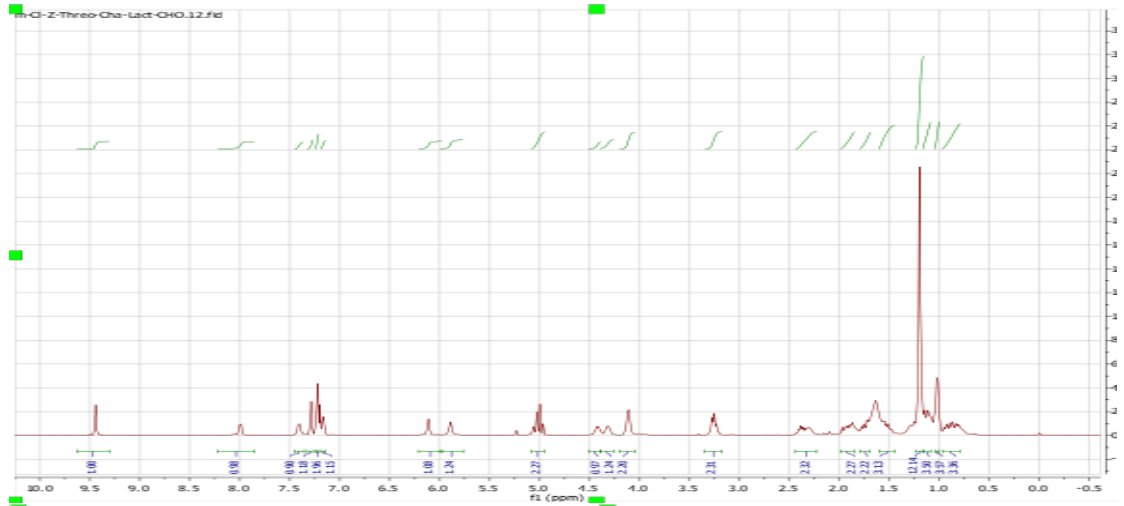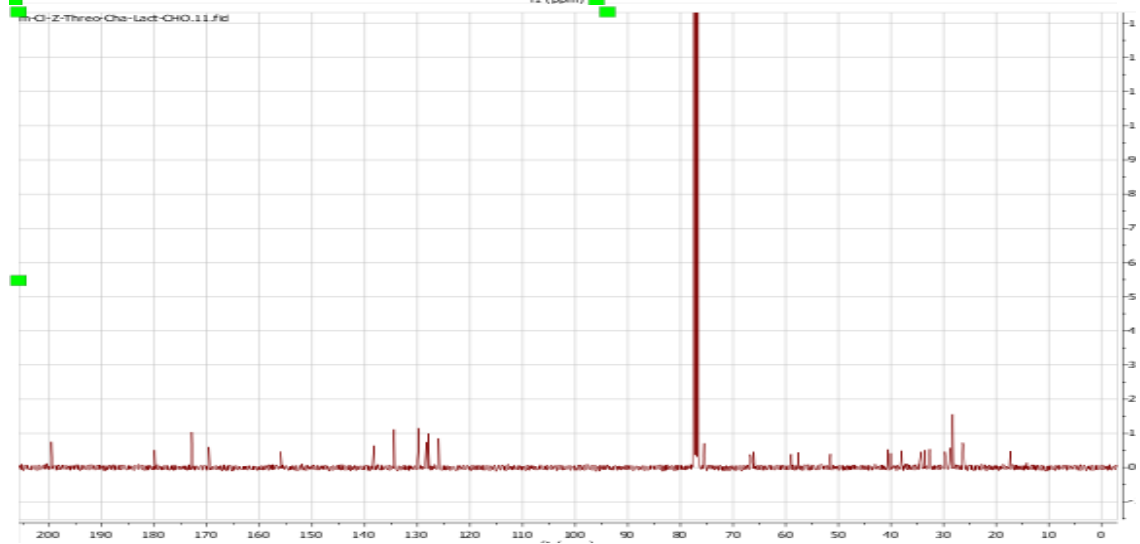

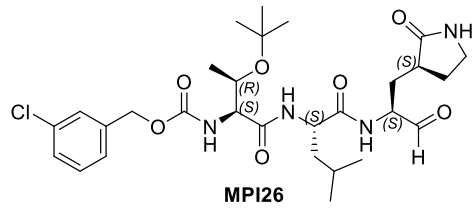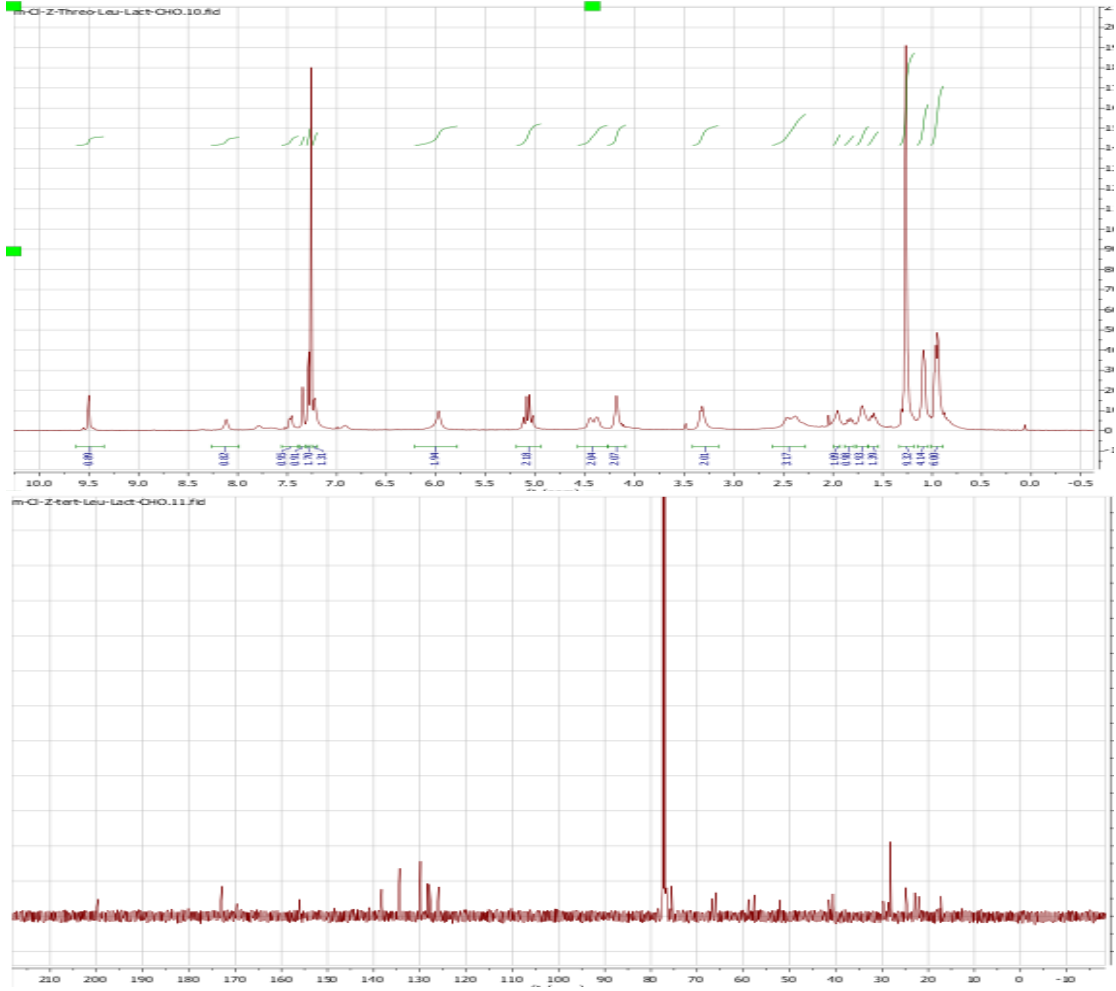

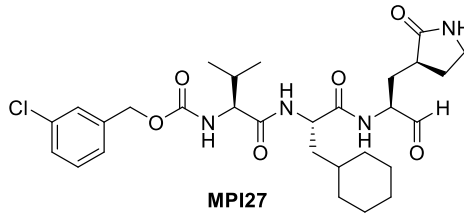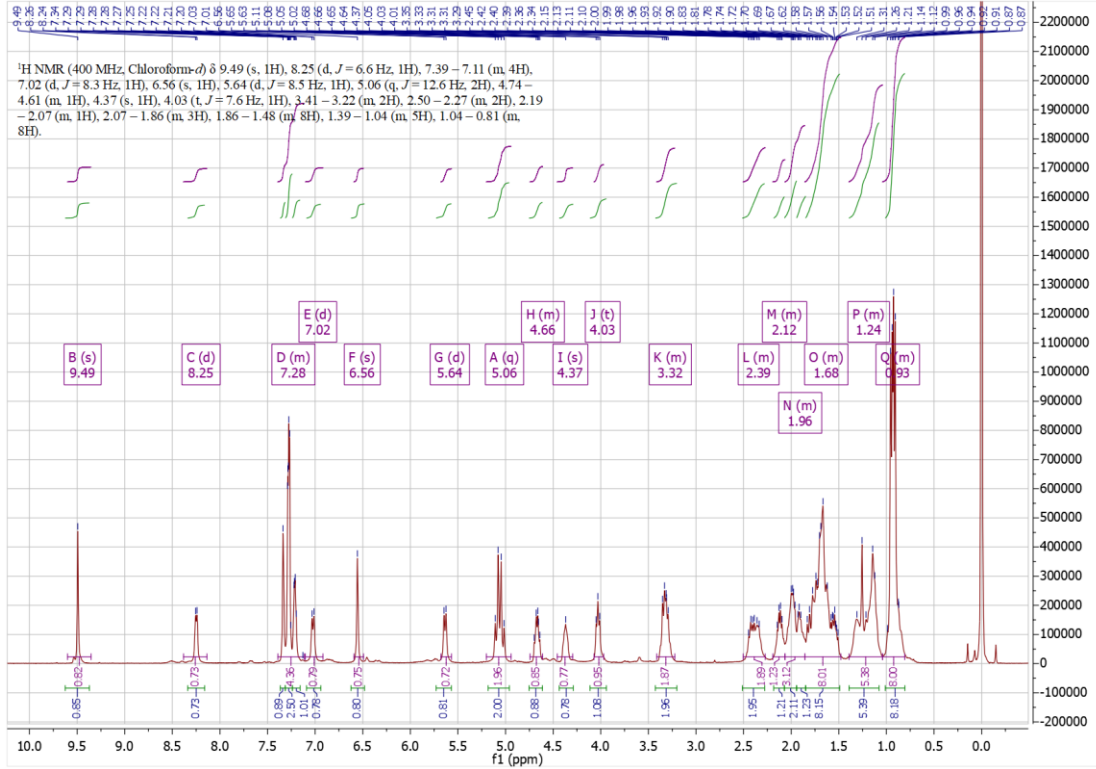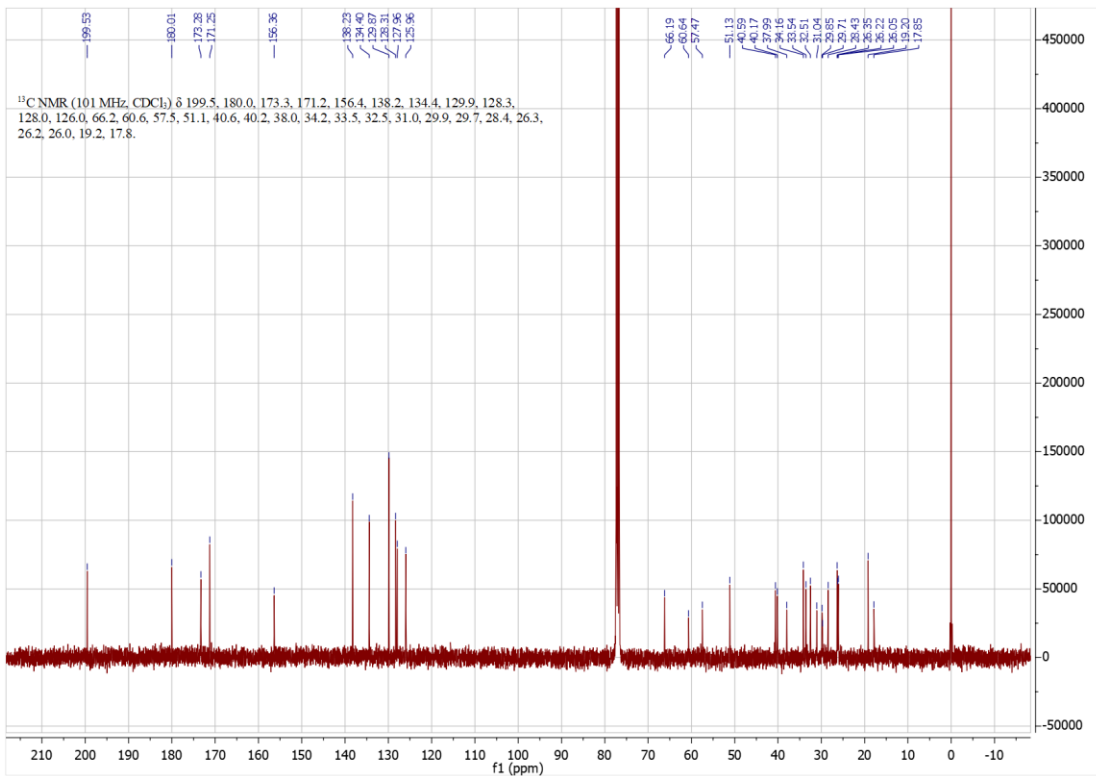

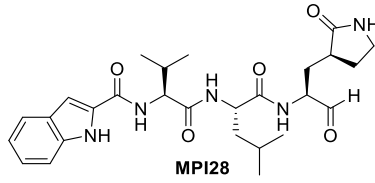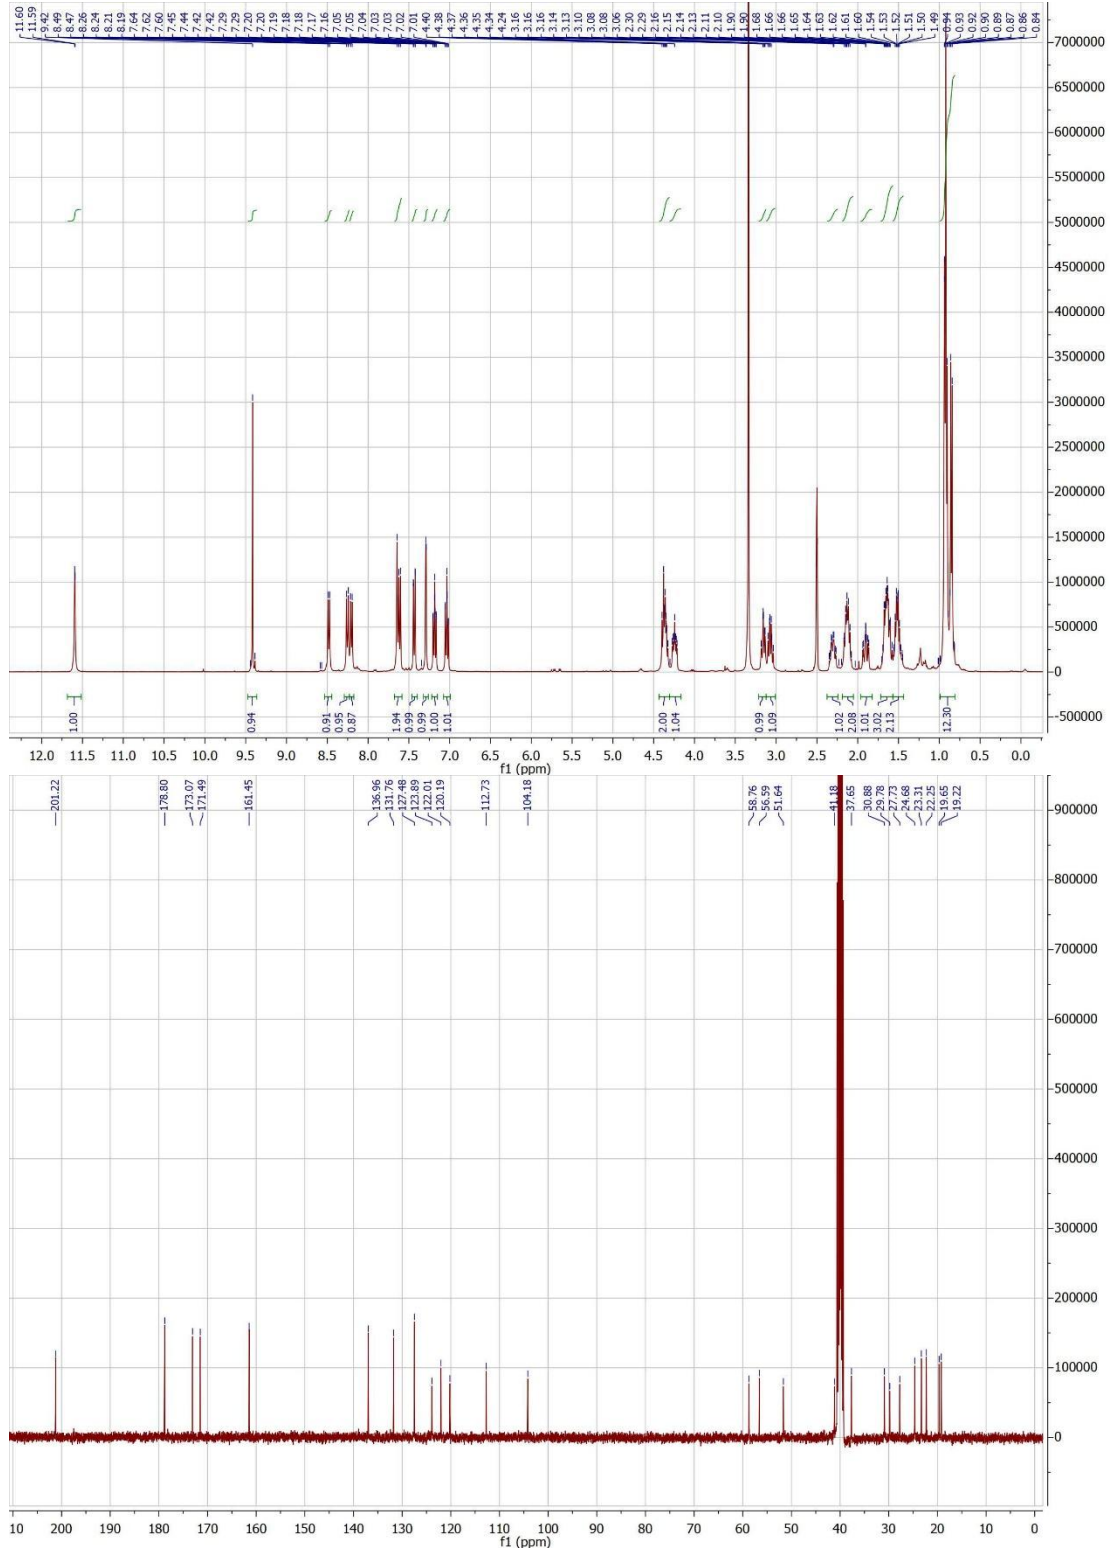

Flow cytometry images for MPI11, compound concentration labeled.

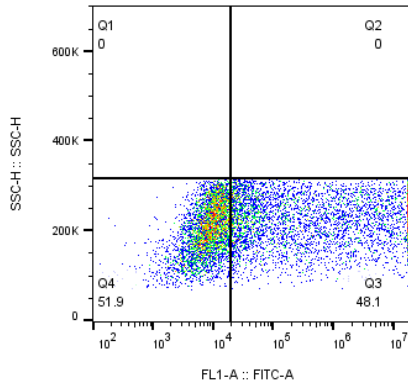

MPI11-10uM  
HEK  
8503

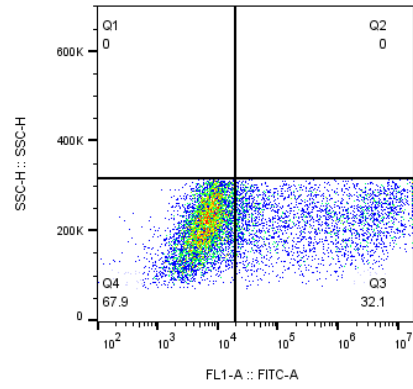

MPI11-2uM  
HEK  
8864

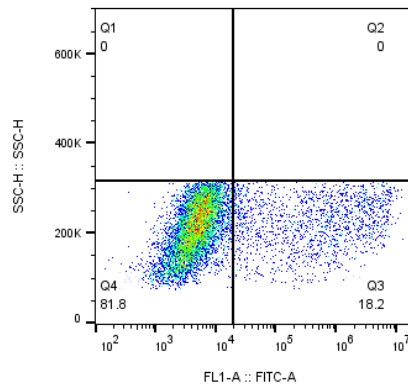

MPI11-400nM  
HEK  
8814

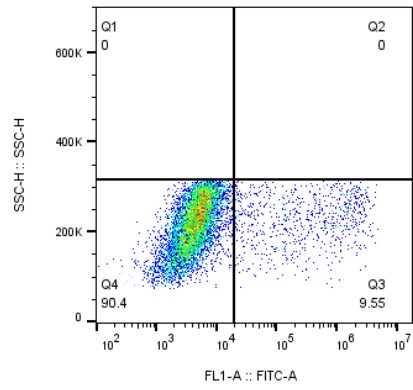

MPI11-80nM  
HEK  
8437

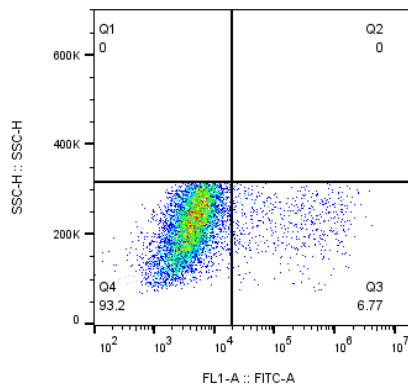

MPI11-16nM  
HEK  
8238

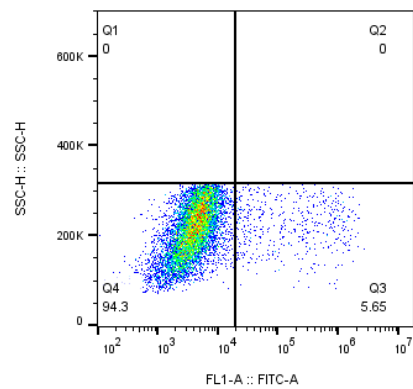

MPI11-3.2nM  
HEK  
8566

MPI12

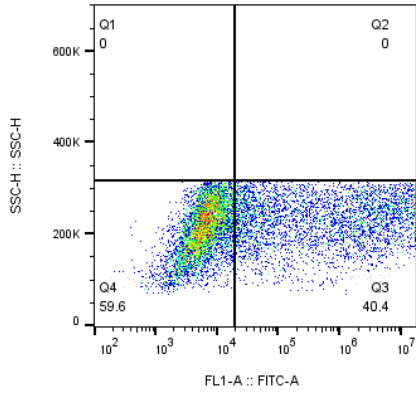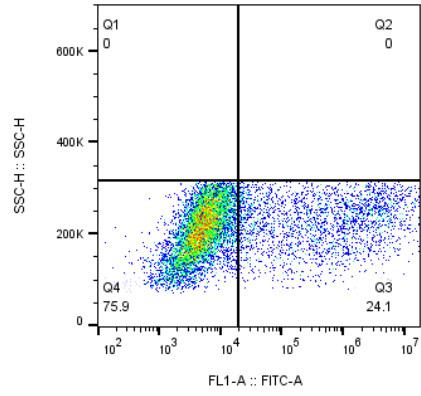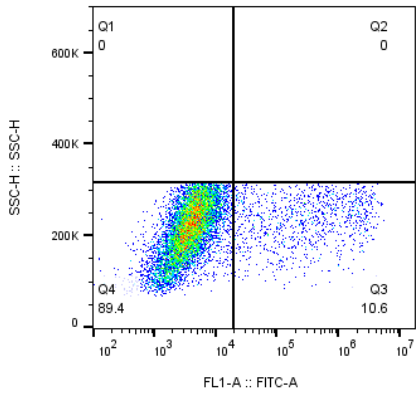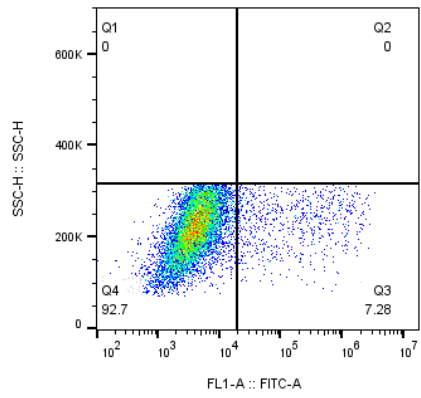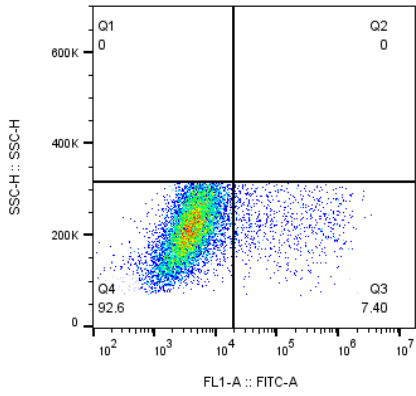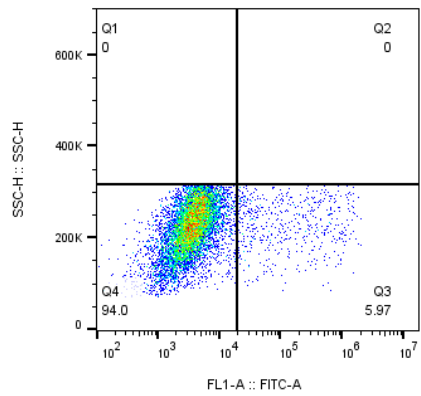

MPI13

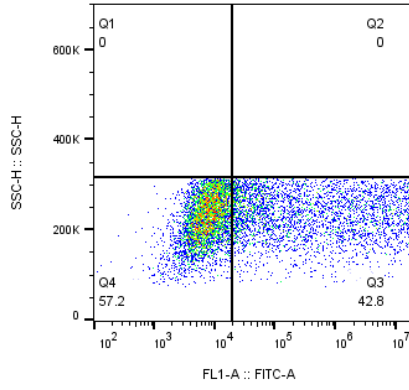

MPI13-10uM  
HEK  
8217

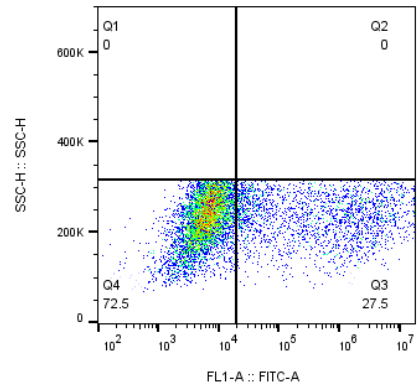

MPI13-2uM  
HEK  
8105

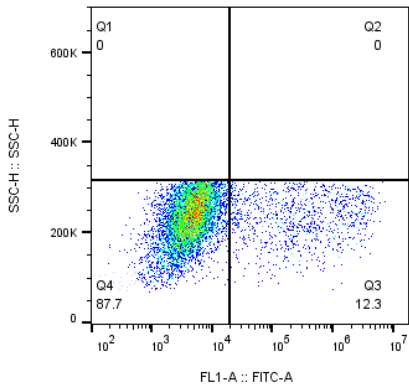

MPI13-400nM  
HEK  
8537

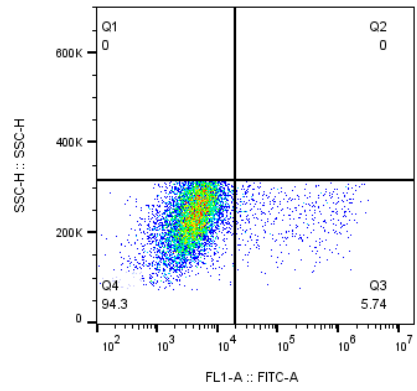

MPI13-80nM  
HEK  
8138

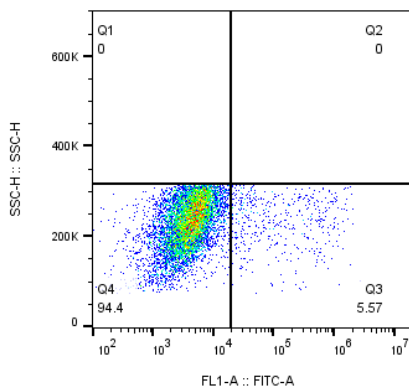

MPI13-16nM  
HEK  
8397

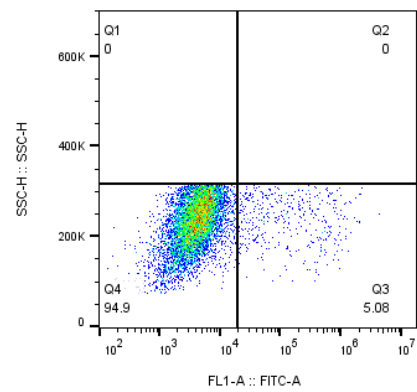

MPI13-3.2nM  
HEK  
8191

MPI14



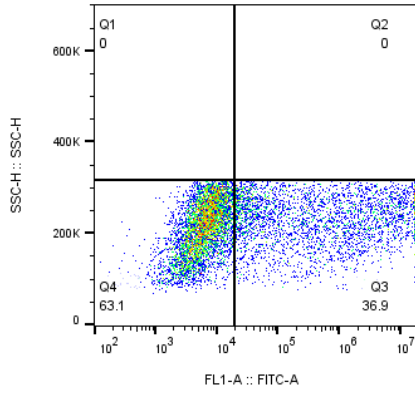

MPI14-10uM  
HEK  
8663

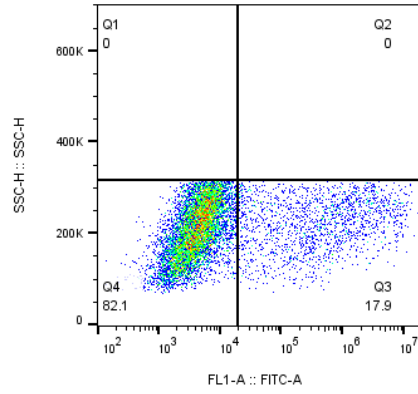

MPI14-2uM  
HEK  
9318

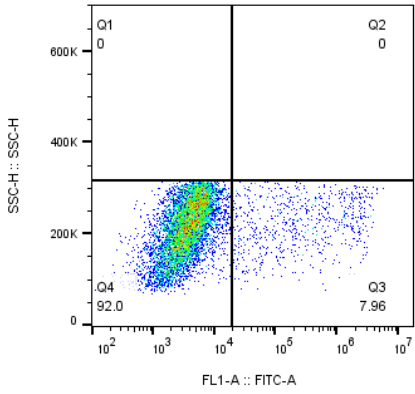

MPI14-400nM  
HEK  
8899

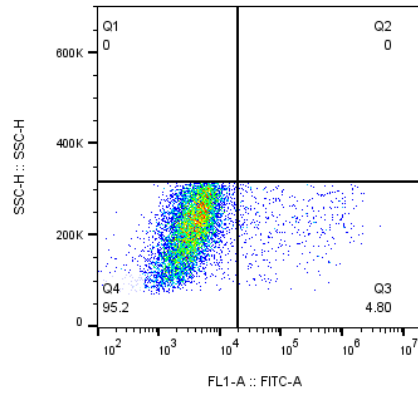

MPI14-80nM  
HEK  
8954

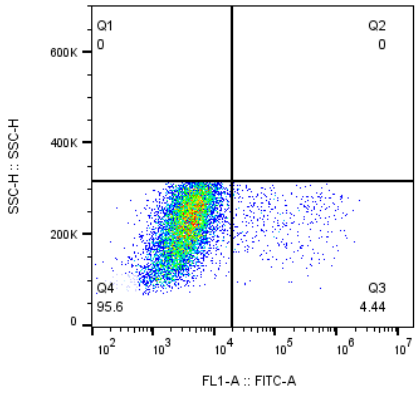

MPI14-16nM  
HEK  
8937

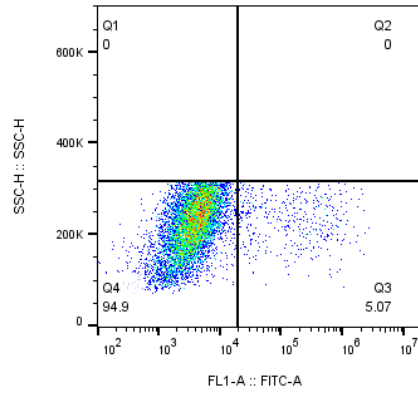

MPI14-3.2nM  
HEK  
8421

MPI16

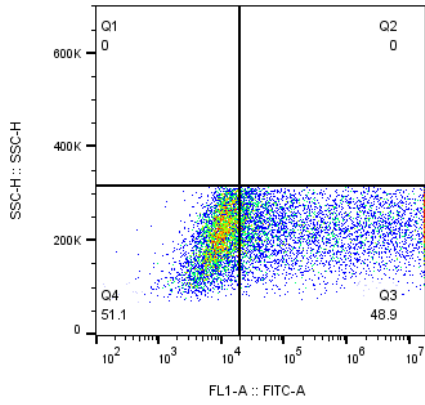

MPI16-10uM  
HEK  
9121

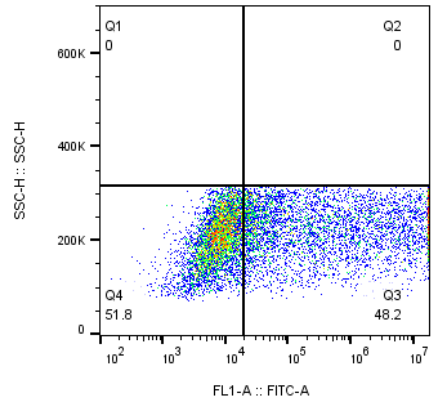

MPI16-2uM  
HEK  
9316

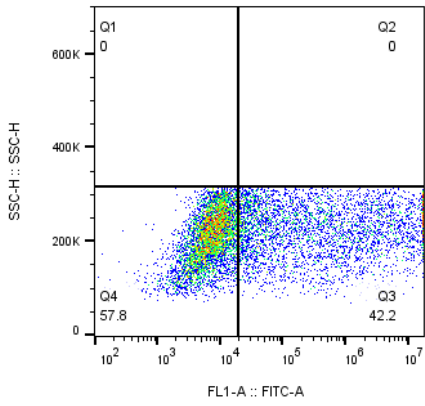

MPI16-400nM  
HEK  
9078

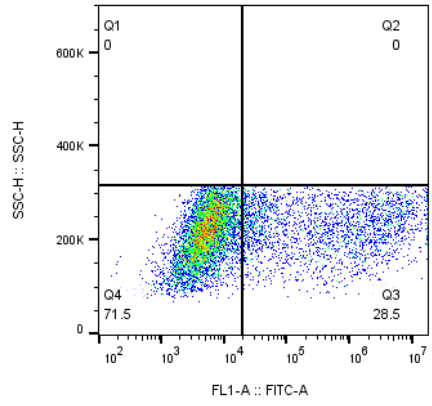

MPI16-80nM  
HEK  
9190

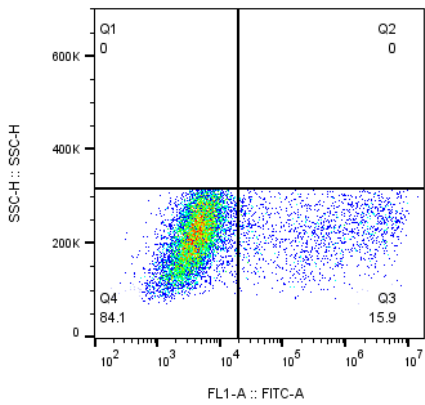

MPI16-16nM  
HEK  
9193

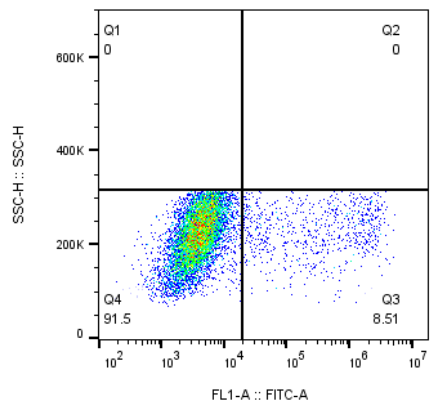

MPI16-3.2nM  
HEK  
8670

MPI17

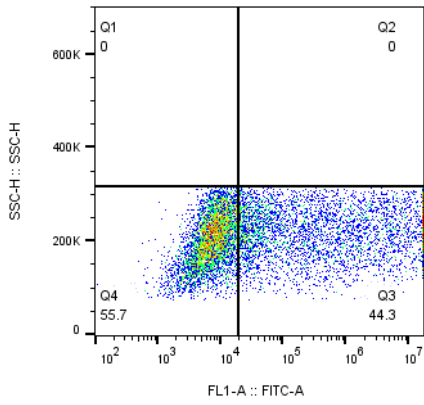

MPI17-10uM  
HEK  
9139

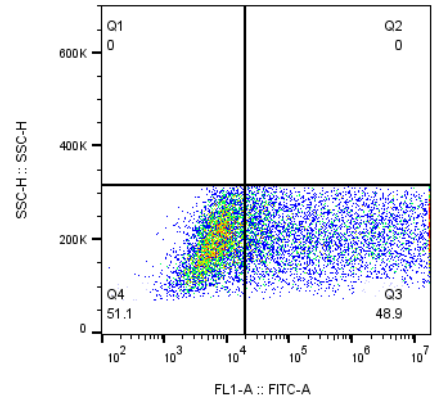

MPI17-2uM  
HEK  
9915

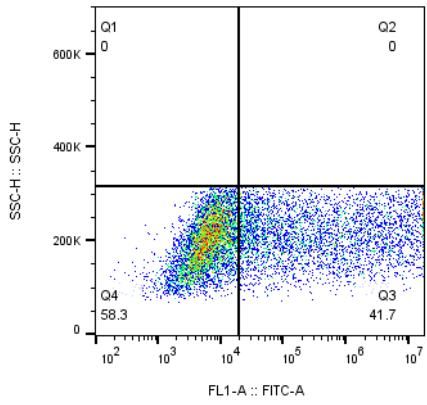

MPI17-400nM  
HEK  
9653

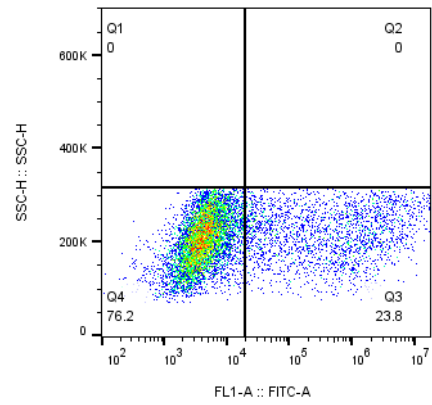

MPI17-80nM  
HEK  
9446

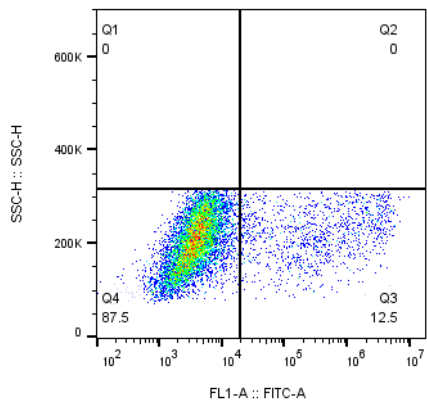

MPI17-16nM  
HEK  
9369

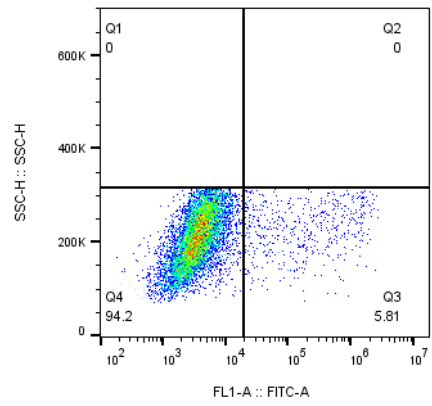

MPI17-3.2nM  
HEK  
9257

MPI18

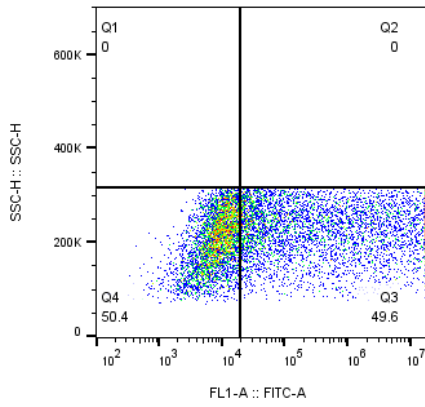

MPI18-10uM  
HEK  
9023

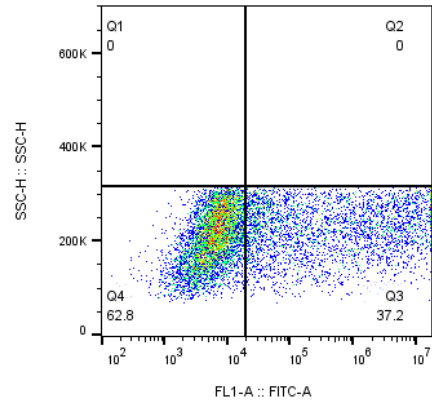

MPI18-2uM  
HEK  
9158

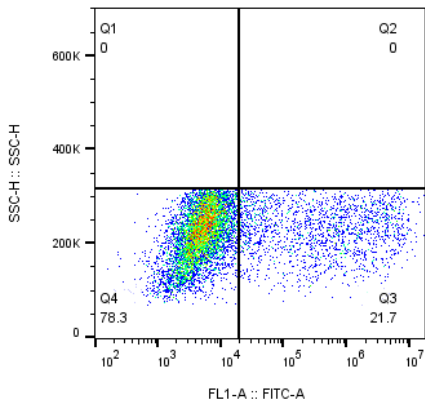

MPI18-400nM  
HEK  
8579

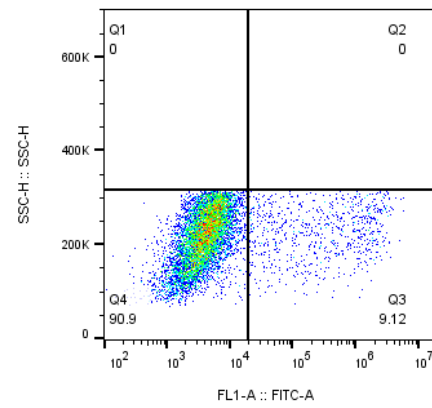

MPI18-80nM  
HEK  
8561

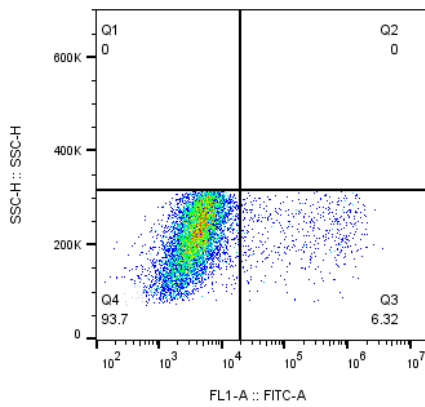

MPI18-80nM  
HEK  
8317

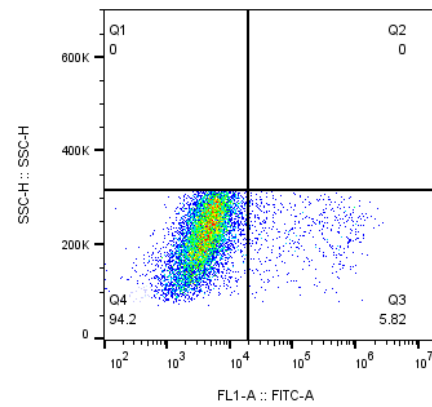

MPI18-3.2nM  
HEK  
8421

MPI19

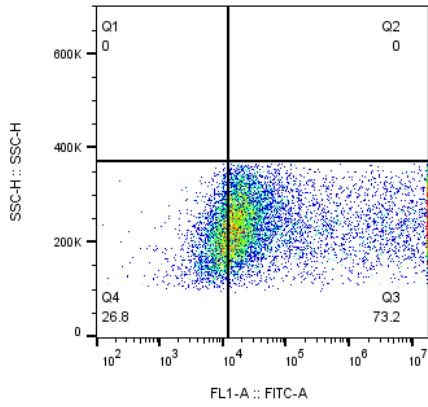

MPI19-10uM  
HEK  
9577

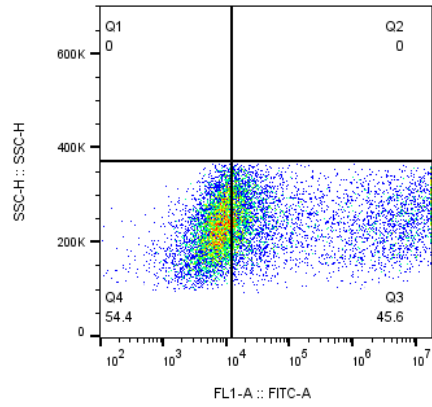

MPI19-2uM  
HEK  
9958

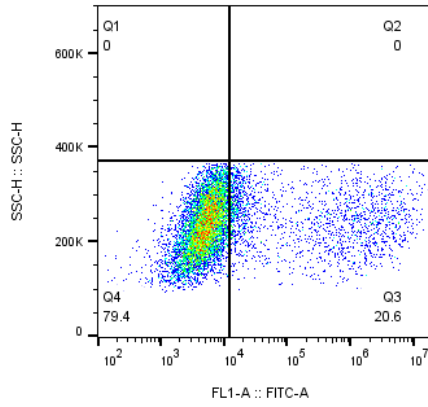

MPI19-400nM  
HEK  
9672

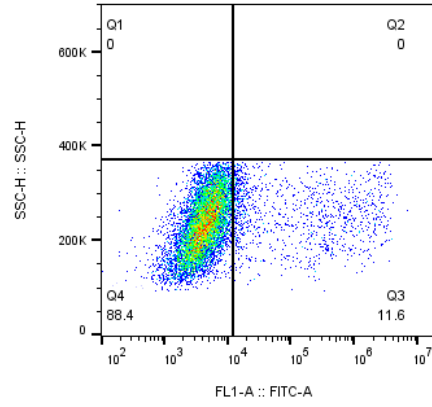

MPI19-80nM  
HEK  
9771

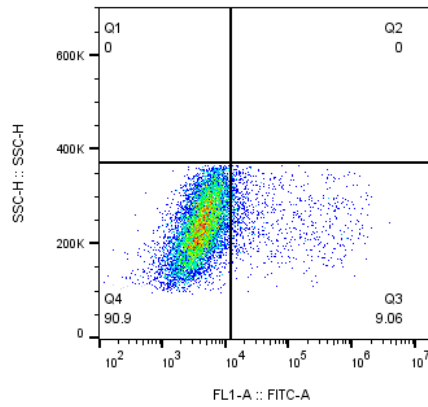

MPI19-16nM  
HEK  
9756

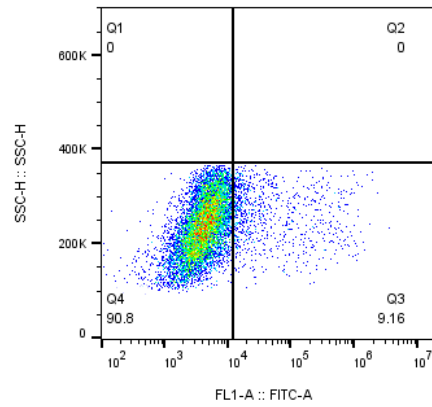

MPI19-3.2nM  
HEK  
9501

MPI20

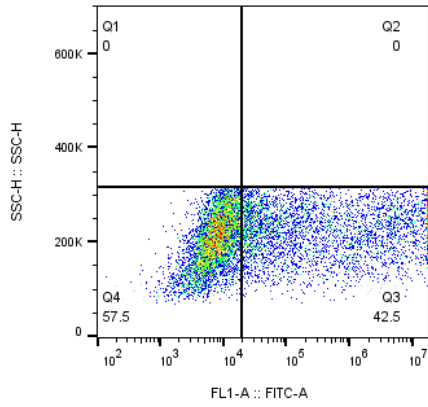

MPI20-10uM  
HEK  
9252

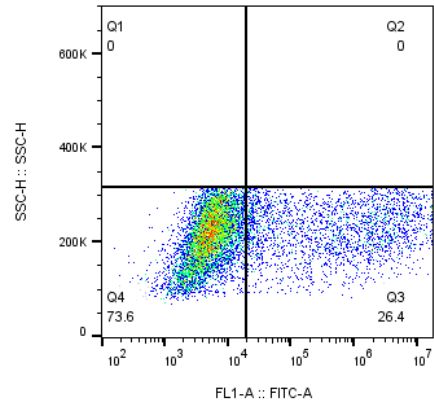

MPI20-2uM  
HEK  
9242

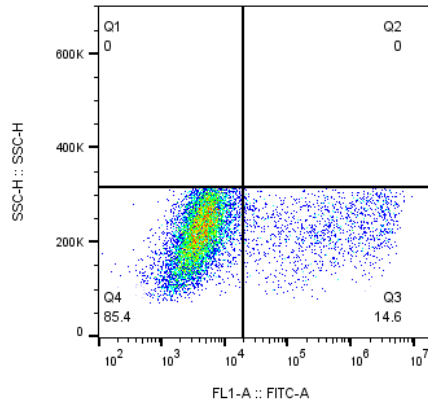

MPI20-400nM  
HEK  
8719

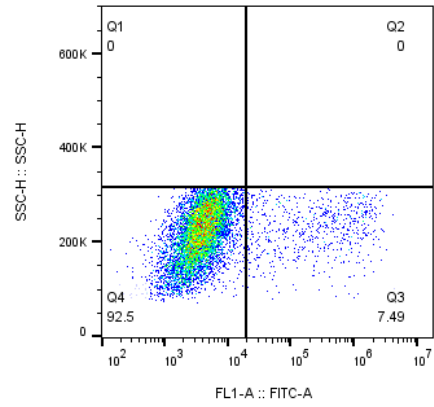

MPI20-80nM  
HEK  
8763

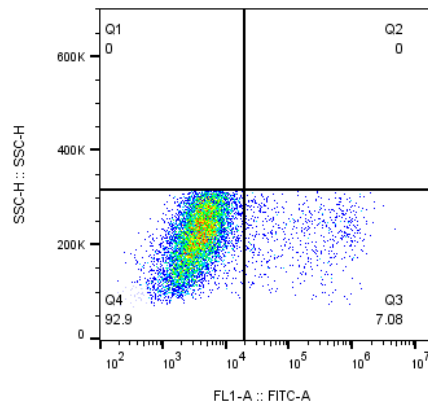

MPI20-16nM  
HEK  
8988

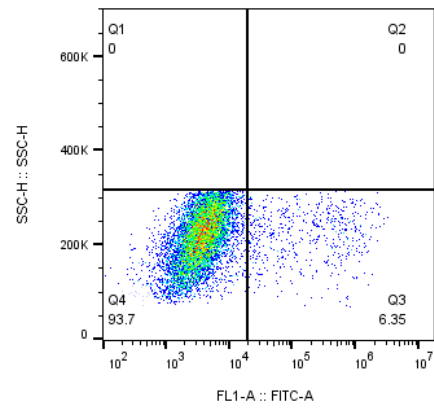

MPI20-3.2nM  
HEK  
8886

MPI21

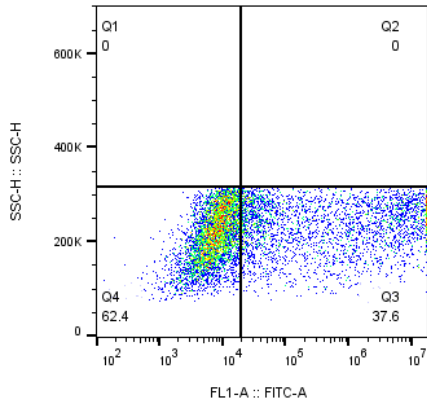

MPI21-10uM  
HEK  
8396

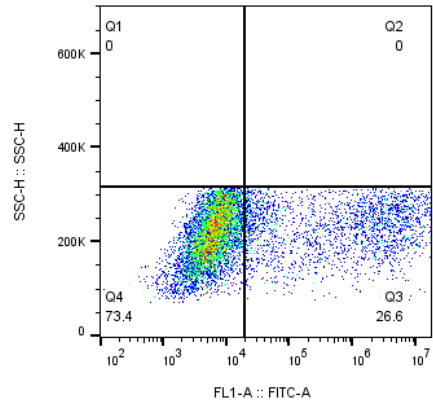

MPI21-2uM  
HEK  
8758

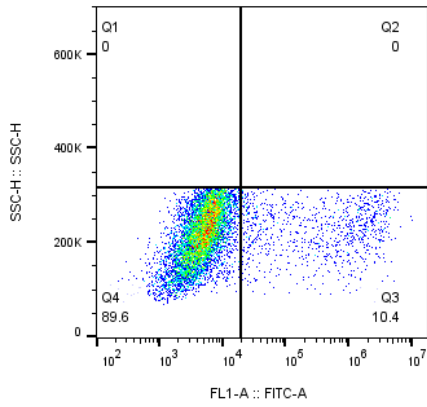

MPI21-400nM  
HEK  
8693

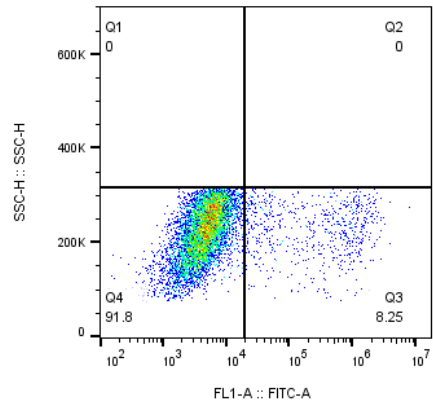

MPI21-80nM  
HEK  
8101

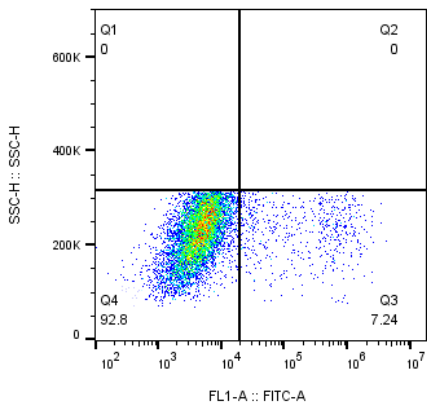

MPI21-16nM  
HEK  
8162

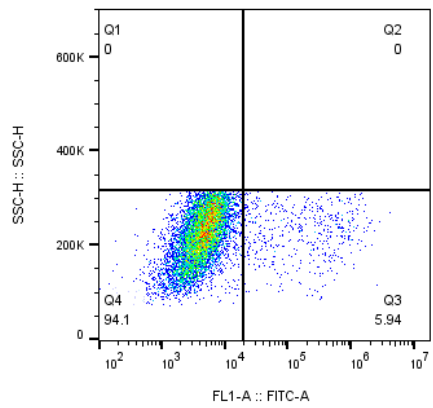

MPI21-3.2nM  
HEK  
8402

MPI22

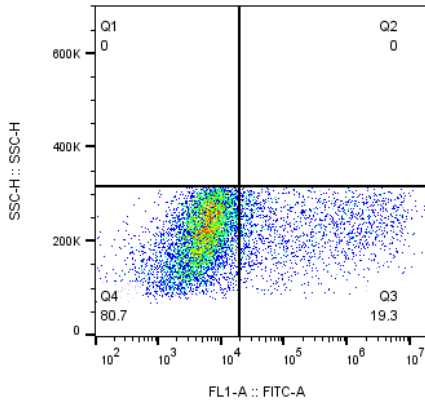

MPI22-10uM  
HEK  
9010

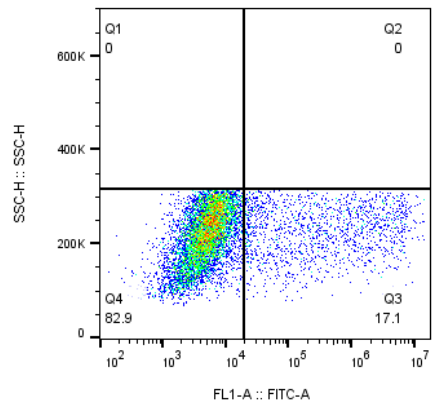

MPI22-2uM  
HEK  
8654

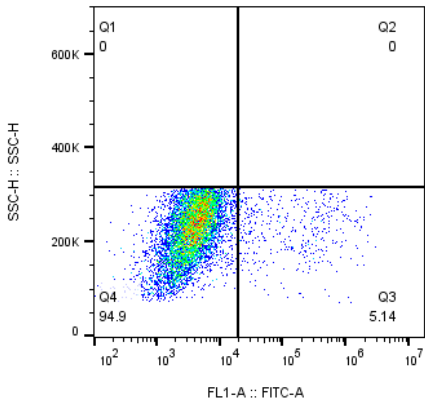

MPI22-400nM  
HEK  
8364

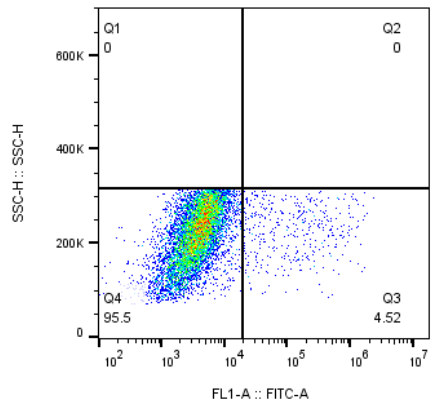

MPI22-80nM  
HEK  
8718

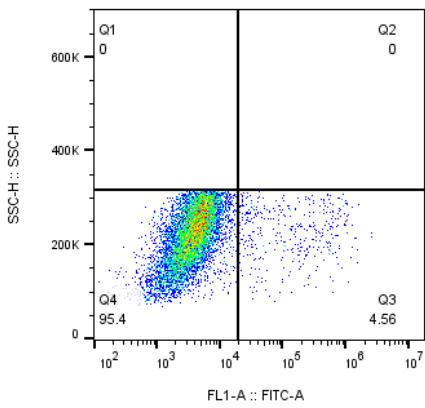

MPI22-16nM  
HEK  
8647

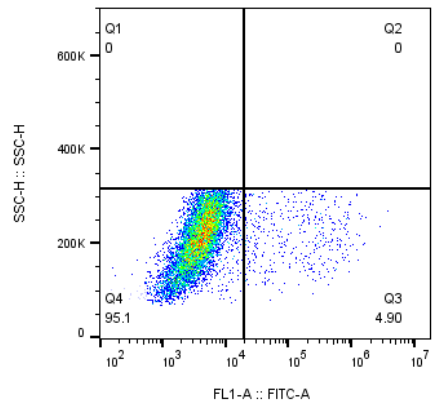

MPI22-3.2nM  
HEK  
8774

MPI23



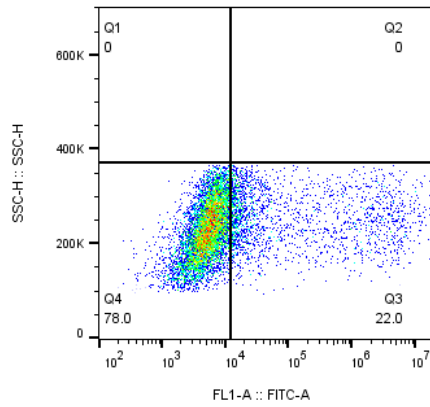

MPI23-10uM  
HEK  
9295

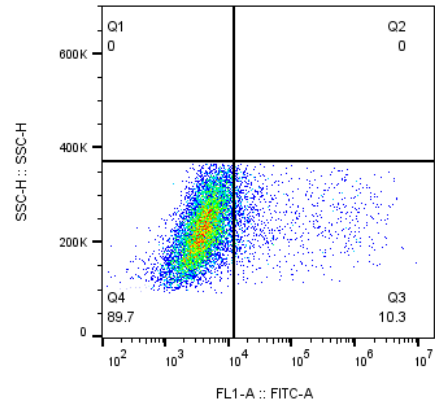

MPI23-2uM  
HEK  
9530

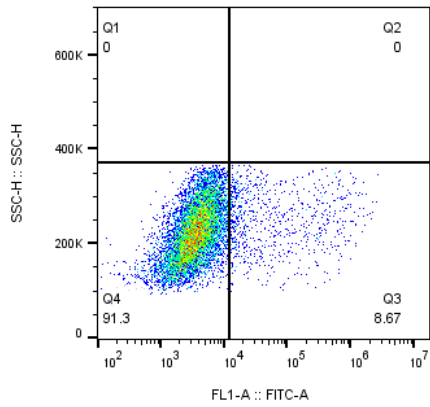

MPI23-400nM  
HEK  
9495

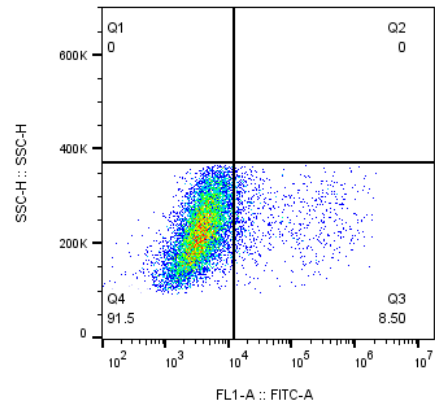

MPI23-80nM  
HEK  
10038

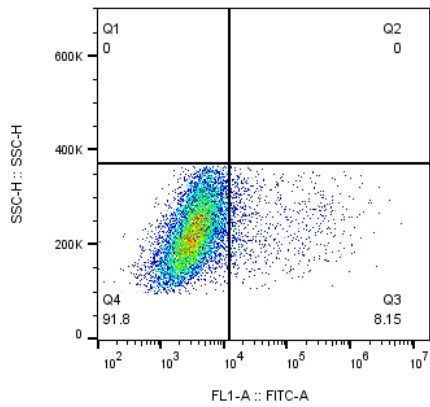

MPI23-16nM  
HEK  
9504

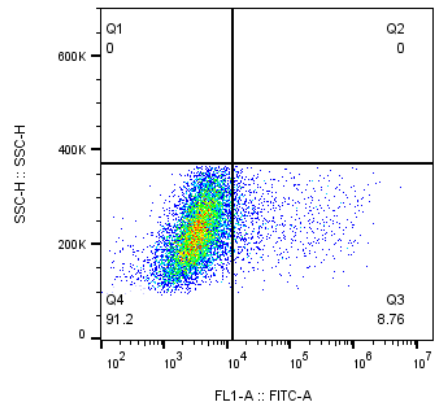

MPI23-3.2nM  
HEK  
9690

MPI24

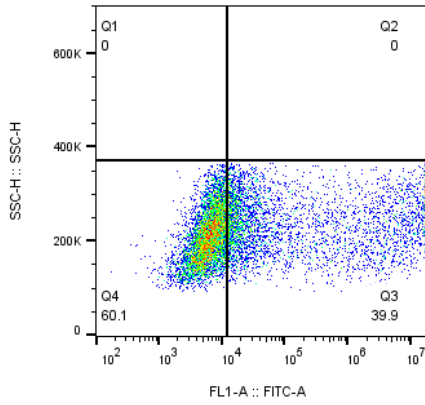

MPI24-10uM  
HEK  
9611

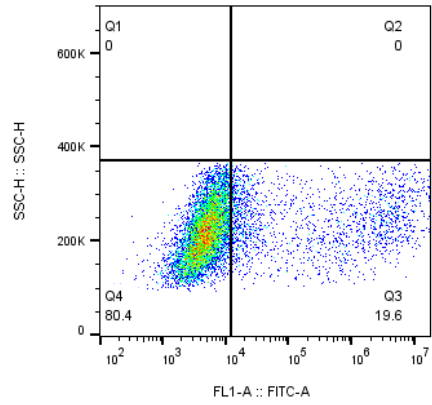

MPI24-2uM  
HEK  
9423

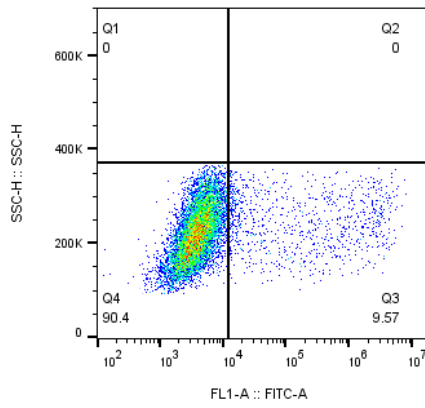

MPI24-400nM  
HEK  
9745

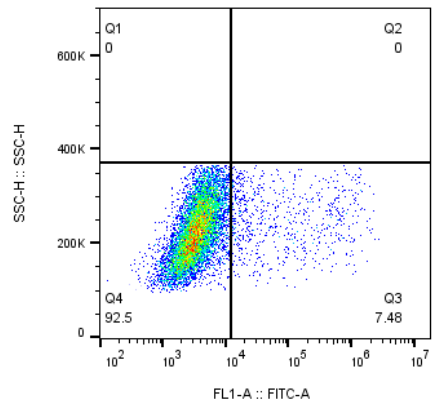

MPI24-80nM  
HEK  
9736

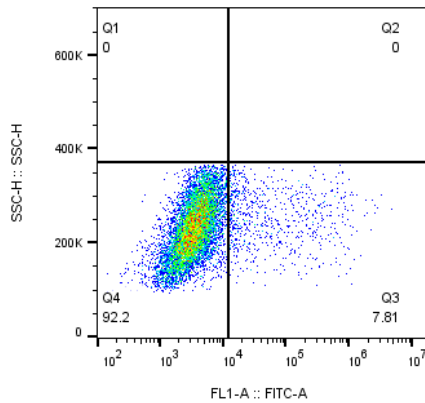

MPI24-16nM  
HEK  
9710

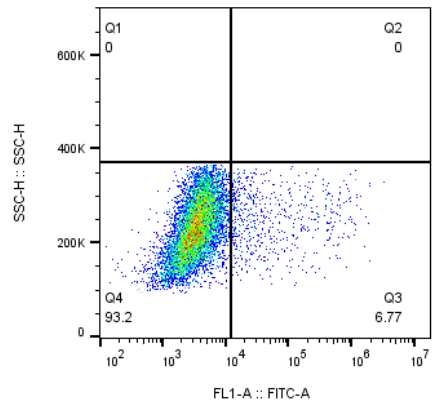

MPI24-3.2nM  
HEK  
9495

MPI25

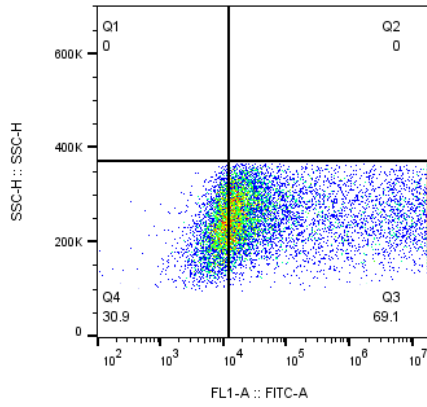

MPI25-10uM  
HEK  
9749

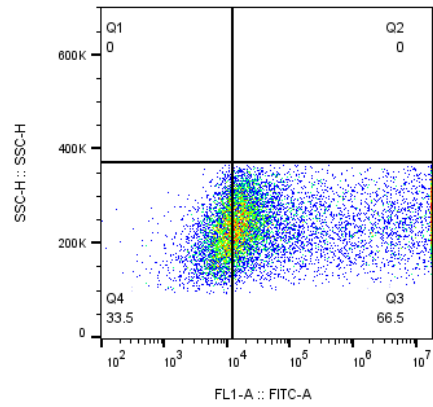

MPI25-2uM  
HEK  
9793

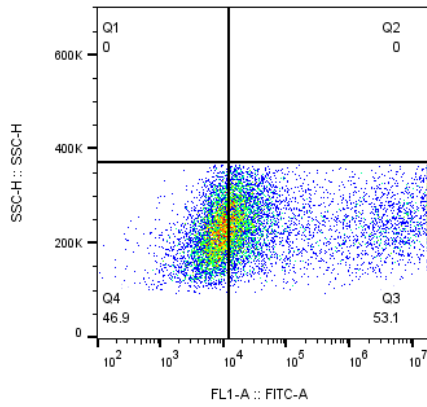

MPI25-400nM  
HEK  
9597

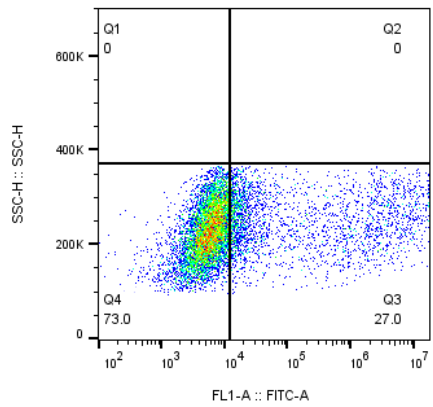

MPI25-80nM  
HEK  
9906

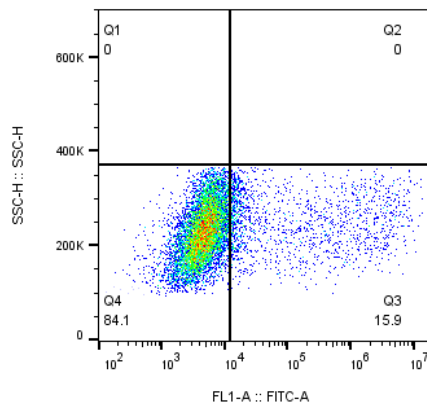

MPI25-16nM  
HEK  
10032

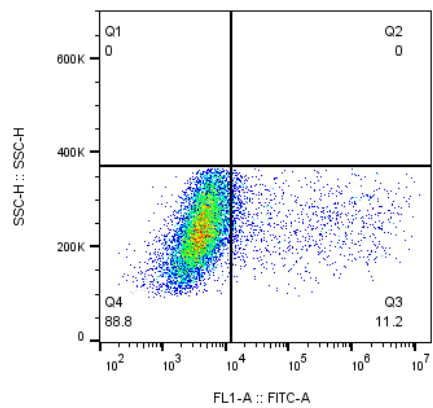

MPI25-3.2nM  
HEK  
9797

MPI26

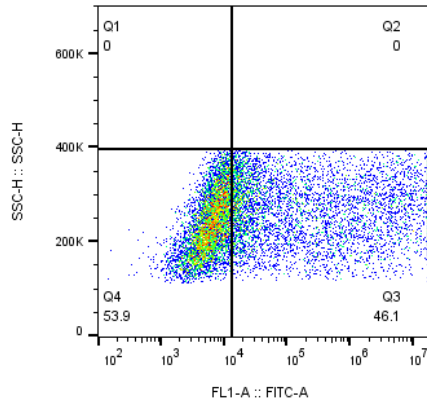

MPI26-10uM  
HEK  
11089

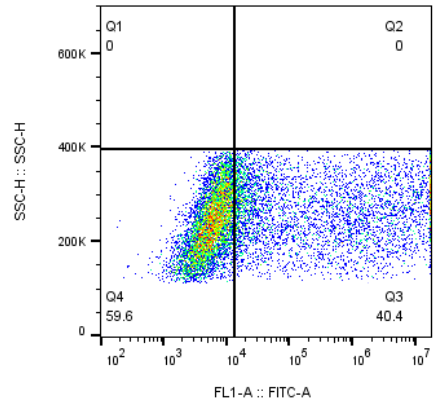

MPI26-2uM  
HEK  
11229

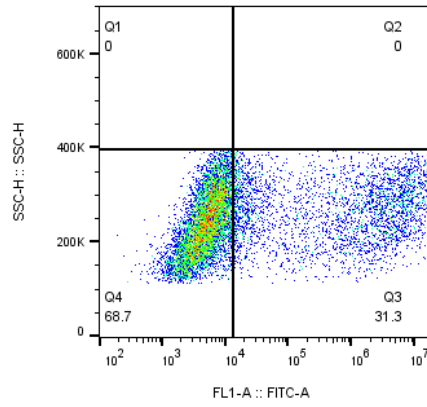

MPI26-400nM  
HEK  
10873

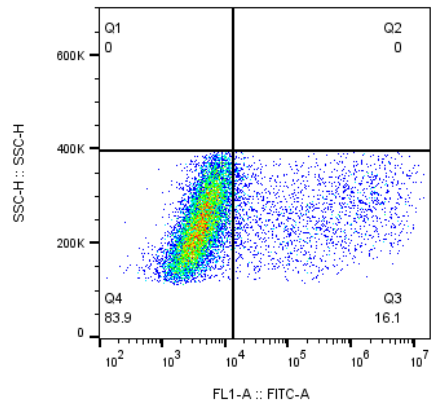

MPI26-80nM  
HEK  
11537

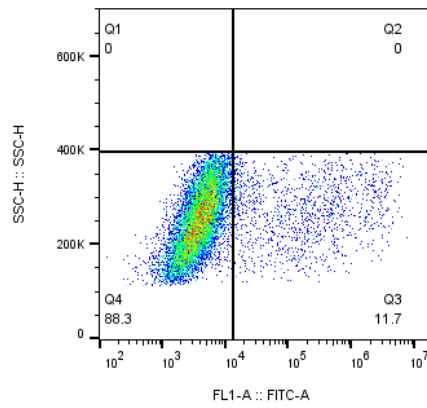

MPI26-16nM  
HEK  
11129

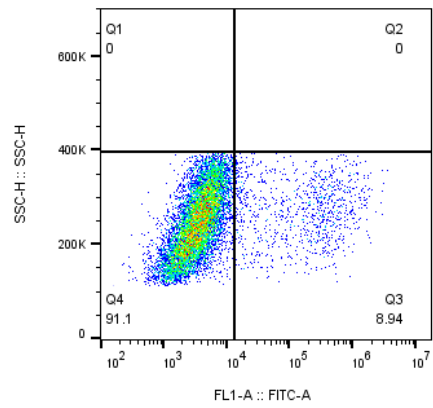

MPI26-3.2nM  
HEK  
11021

MPI27

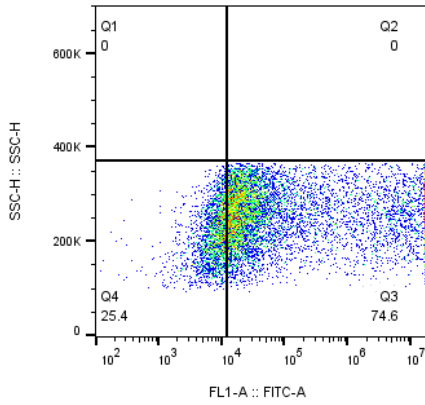

MPI27-10uM  
HEK  
9718

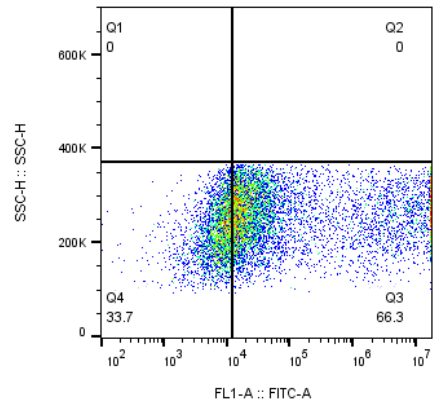

MPI27-2uM  
HEK  
9676

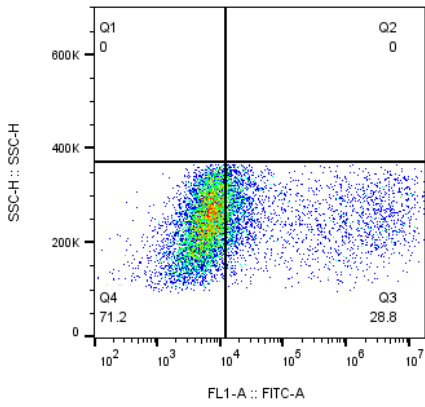

MPI27-400nM  
HEK  
9714

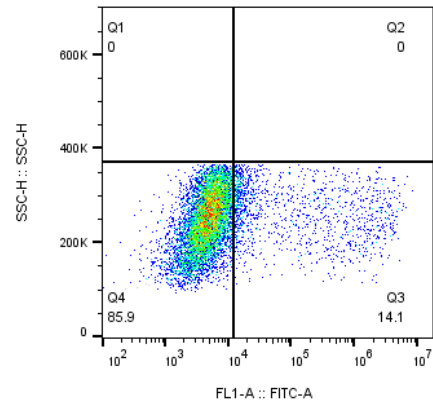

MPI27-80nM  
HEK  
9987

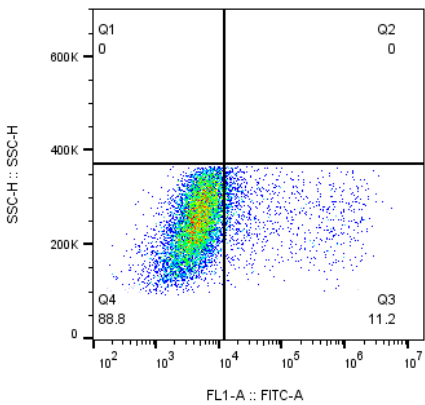

MPI27-16nM  
HEK  
9631

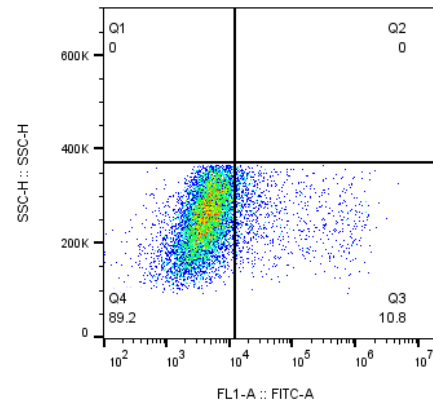

MPI27-3.2nM  
HEK  
9598

MPI28

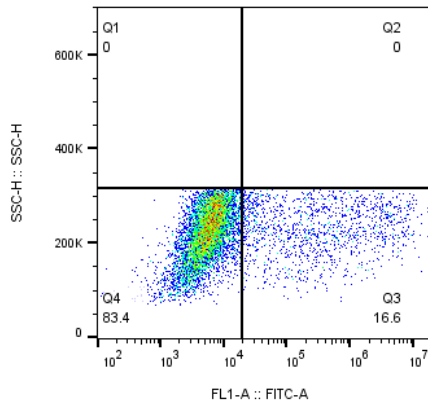

MPI28-10uM  
HEK  
8268

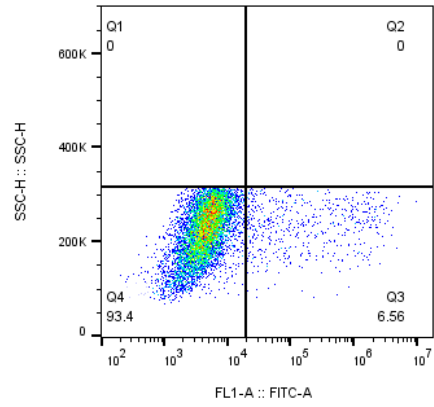

MPI28-2uM  
HEK  
8242

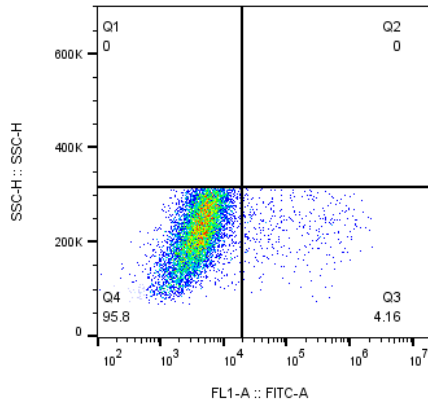

MPI28-400nM  
HEK  
8453

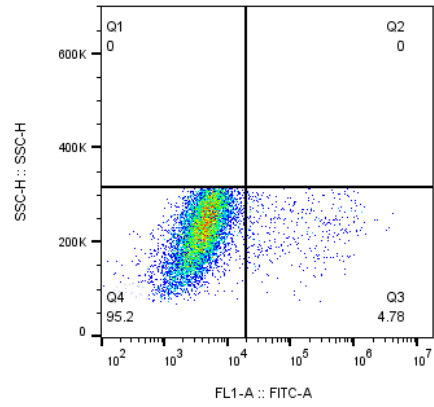

MPI28-80nM  
HEK  
8396

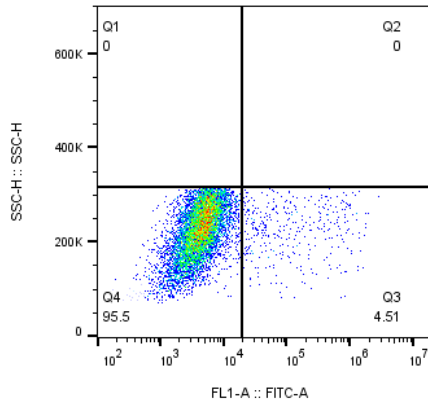

MPI28-16nM  
HEK  
8027

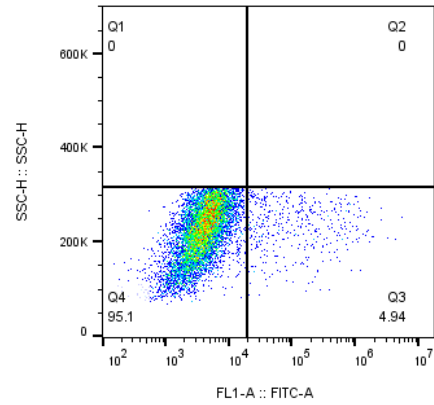

MPI28-3.2nM  
HEK  
8466

## References

1. Yang, K. S.; Ma, X. R.; Ma, Y.; Alugubelli, Y. R.; Scott, D. A.; Vatansever, E. C.; Drelich, A. K.; Sankaran, B.; Geng, Z. Z.; Blankenship, L. R.; Ward, H. E.; Sheng, Y. J.; Hsu, J. C.; Kratch, K. C.; Zhao, B.; Hayatshahi, H. S.; Liu, J.; Li, P.; Fierke, C. A.; Tseng, C. K.; Xu, S.; Liu, W. R., A Quick Route to Multiple Highly Potent SARS-CoV-2 Main Protease Inhibitors\*. *ChemMedChem* **2021**, *16* (6), 942-948.
2. Winn, M. D.; Ballard, C. C.; Cowtan, K. D.; Dodson, E. J.; Emsley, P.; Evans, P. R.; Keegan, R. M.; Krissinel, E. B.; Leslie, A. G. W.; McCoy, A.; McNicholas, S. J.; Murshudov, G. N.; Pannu, N. S.; Potterton, E. A.; Powell, H. R.; Read, R. J.; Vagin, A.; Wilson, K. S., Overview of the CCP4 suite and current developments. *Acta Crystallographica Section D Biological Crystallography* **2011**, *67* (4), 235-242.
3. Adams, P. D.; Afonine, P. V.; Bunkóczi, G.; Chen, V. B.; Davis, I. W.; Echols, N.; Headd, J. J.; Hung, L.-W.; Kapral, G. J.; Grosse-Kunstleve, R. W.; McCoy, A. J.; Moriarty, N. W.; Oeffner, R.; Read, R. J.; Richardson, D. C.; Richardson, J. S.; Terwilliger, T. C.; Zwart, P. H., PHENIX: a comprehensive Python-based system for macromolecular structure solution. *Acta Crystallographica Section D Biological Crystallography* **2010**, *66* (2), 213-221.
4. Emsley, P.; Lohkamp, B.; Scott, W. G.; Cowtan, K., Features and development of Coot. *Acta Crystallographica Section D Biological Crystallography* **2010**, *66* (4), 486-501.
